# Supplementary material for: Emergence of Dip2-mediated specific DAG-based PKC signalling axis in eukaryotes
Source: eLife journal article supplement (doi:10.7554/elife.104011), 2025-01-09
Supplement: fig1-data3 [file elife-104011-fig1-data3-v1.zip]

## Sheet: Sheet1
		Dilution factor = 500
		Volume of culture plated= 0.08ml
	WT		WT+CR		ΔDIP2		ΔDIP2+CR
	Number of colonies	Colony forming units	Number of colonies	Colony forming units	Number of colonies	Colony forming units	Number of colonies	Colony forming units
Rep1	852	5325000	11	68750	975	6093750	670	4187500
Rep2	1078	6737500	15	93750	1301	8131250	804	5025000
Rep3	1324	8275000	13	81250	1328	8300000	928	5800000
