# Supplementary material for: Emergence of Dip2-mediated specific DAG-based PKC signalling axis in eukaryotes
Source: eLife journal article supplement (doi:10.7554/elife.104011), 2025-01-09
Supplement: fig2-data1 [file elife-104011-fig2-data1-v1.zip]

## Sheet: Sheet1
	Normalized intensities of DAG species						Average	SEM	p-value
	WT
32:1	135400	202570	184586	191679	284664	205054	200659	18010.5	Reference
34:1	228200	247394	239765	212307	218361	250650	232780	5844.57	Reference
36:0	24684.3	16090.3	19936.6	18482.6	25933.9	13490.7	19769.7	1801.23	Reference
36:1	15168.4	17069.2	16035.2	16629.8	16128.6	15339.3	16061.7	271.969	Reference
	WT + CW stress (CFW)
32:1	207487	222708	181943	166293	185039	216416	196648	3374.59	0.857092
34:1	277162	231563	169393	221363	182840	187164	211581	6084.97	0.25457
36:0	259970	176409	131688	125698	135236	173648	167108	7679.3	3.22611e-05
36:1	61719	62580	104740	101586	150185	123977	100798	5261.81	0.000132062
