# Supplementary material for: Emergence of Dip2-mediated specific DAG-based PKC signalling axis in eukaryotes
Source: eLife journal article supplement (doi:10.7554/elife.104011), 2025-01-09
Supplement: fig2-figsupp1-data3 [file elife-104011-fig2-figsupp1-data3-v1.zip]

## Sheet: Sheet1
	Normalized intensities of TAG species						Average	SEM	p-value
TAG species	WT
46:0	2781.05	1606.08	1644.37	2815.24	1727.78	2473.53	2174.68	215.482	Reference
46:1	10912.4	6414.07	4582.69	11336	7053.6	8082.67	8063.57	981.528	Reference
46:2	15983.6	10293.7	6570.63	16982.5	10481.8	11558.1	11978.4	1448.96	Reference
48:0	4602.36	2619.98	7714.09	4925.52	2713.43	3724.69	4383.35	702.529	Reference
48:1	26115.3	14501.9	10888.5	27193.8	16718.3	19443.7	19143.6	2409.91	Reference
48:2	64511.8	41543.4	30092.2	68994.8	43949	53719.4	50468.4	5498.38	Reference
48:3	55268.6	39574.8	25858.6	58728.4	37969	45654.2	43842.3	4507.89	Reference
50:0	5020.04	2812.55	12003.7	5387.98	2786.56	3752.82	5293.94	1290.18	Reference
50:1	24219.7	13747.3	10055.2	24924.7	15122.7	17851.3	17653.5	2207.45	Reference
50:2	62964.9	41639	28400.4	66442.5	42120.7	50906	48745.6	5344.67	Reference
50:3	57954.3	43311.1	27862.1	61276	39624.6	49077.4	46517.6	4597.66	Reference
52:0	3484.33	2003.46	6866.46	3425.52	1888.87	2240.63	3318.21	698.45	Reference
52:1	9943.84	5869.09	3781.99	9717.54	5893.16	6673.28	6979.82	897.762	Reference
52:2	0	16543.5	10544.3	25735.8	15870.7	18692.2	14564.4	3230.69	Reference
52:3	20092	14968.2	9366.05	20397.6	12881.7	15825.7	15588.5	1580.23	Reference
52:4	1868.86	1006.73	869.314	1383.72	1087.62	1561.3	1296.26	140.969	Reference
54:0	1462.23	776.113	1811.41	1332.56	595.554	721.325	1116.53	182.004	Reference
54:1	2121.43	1238.07	740.305	1918.89	1070.18	1194.37	1380.54	197.197	Reference
54:2	3802.4	2468.07	1605.05	3612.24	2235.95	2524.46	2708.03	313.845	Reference
54:3	3750.96	2373.44	1819.68	2824.17	1852.74	2700.41	2553.57	268.263	Reference
54:4	3089.79	1893.99	1160.45	1966.28	1325.46	2280.23	1952.7	259.538	Reference
54:6	1853.93	1458.02	1026.18	1334.32	840.649	1767.75	1380.14	148.998	Reference
	WT + CW stress (CFW)
46:0	2577.9	5329.06	4382.19	3056.94	8036.25	3372.2	4459.09	306.149	0.0233843
46:1	9755.26	18614.6	19610.9	12016	30925.1	14595.4	17586.2	1147.42	0.0153009
46:2	14356.2	27237	31561.6	18226.7	45905.8	23233.3	26753.4	1706.41	0.0122754
48:0	4412.87	8248.03	7211.97	5065.02	13411.2	5587.79	7322.82	502.368	0.0875214
48:1	23481.5	44110.8	47982.9	28632.8	72935.7	35305	42074.8	2690.58	0.0137354
48:2	63112.8	107963	120617	78024.3	196408	92232.7	109726	7174.82	0.0148465
48:3	55086	94006.7	107123	69012.6	172730	82365.2	96720.6	6310.01	0.0133857
50:0	4804.98	8593.39	7974.47	5559.08	14529.3	6011.77	7912.16	540.308	0.225035
50:1	22191.6	43290.8	49170	27407.7	67594.7	34493	40691.3	2508.83	0.00916417
50:2	60576.6	107542	124489	76147.1	183316	92684.3	107459	6611.24	0.0104575
50:3	57891.4	99174.4	117519	73778.4	177007	88660.1	102338	6380.71	0.0107306
52:0	3499.23	6152.6	6172.14	4115.56	10543.9	4514.68	5833.02	388.158	0.0802922
52:1	9627.61	18814.2	22230.9	12100.5	28584.8	14962.9	17720.2	1063.4	0.00519324
52:2	23716.8	45394.9	56402.2	30428.3	70771.2	38937.8	44275.2	2629.28	0.00369655
52:3	19352.8	35245.7	45063.7	25086.8	58064.2	31852.2	35777.6	2132.95	0.00704444
52:4	2231.38	2811.35	2238.63	1935.62	5498.46	2097.45	2802.15	205.942	0.0253984
54:0	1442.12	2884.54	2795.2	1705.77	4472.88	1974.68	2545.87	168.607	0.0160789
54:1	2093.52	4171.05	4855.83	2601.14	6083.09	3225.31	3838.32	227.056	0.00347349
54:2	3984.19	7035.44	8382.62	5115.42	11338.7	5736.19	6932.1	402.273	0.00391843
54:3	3852.75	5081.6	4824.49	4035.28	11179.5	3870.26	5473.99	432.474	0.0348716
54:4	3429.54	3722.71	2637.52	3221.82	9955.65	2607.55	4262.46	429.575	0.0803414
54:6	2186.09	1796.6	1330.8	2179.16	6316.96	1567.41	2562.84	284.463	0.160671
