# Supplementary material for: Emergence of Dip2-mediated specific DAG-based PKC signalling axis in eukaryotes
Source: eLife journal article supplement (doi:10.7554/elife.104011), 2025-01-09
Supplement: fig3-data1 [file elife-104011-fig3-data1-v1.zip]

## Sheet: Sheet1
	Normalized intensities of DAG species						Average	SEM	p-value
DAG	WT
32:1	7329.37	3880.51	2803.91	7696.22	4235.52	4925.76	5145.21	800.73	Reference
32:2	9180.76	5007.56	3510.41	10272.6	5661.91	6140.19	6628.91	1053.82	Reference
34:1	4419.13	2621.36	1921.12	4588.45	2564.87	3211.3	3221.04	439.139	Reference
36:0	1372.55	1656.86	1990.2	1323.53	1803.92	1156.86	1550.65	130	Reference
36:1	476.456	336.348	219.262	524.378	274.583	382.918	368.991	47.7092	Reference
	ΔDIP2
32:1	3983.46	6464.43	4600.14	6702.56	5371.11	8786.32	5984.67	704.581	0.449503
32:2	4802.21	7498.6	5515.93	8688.24	6321.29	11294.2	7353.41	970.961	0.624089
34:1	2605.31	3796.52	3176.83	4576.97	3408.39	5535.6	3849.94	430.891	0.330771
36:0	3607.84	4754.9	5343.14	6245.1	5176.47	5970.59	5183.01	384.639	4.36635e-06
36:1	10351.3	9520.05	8445.7	9651.23	7450.84	6780.77	8699.98	566.053	4.34106e-08
	ΔDGA1ΔLRO1
32:1	16650.4	15741.5	12797.5	12077.9	9626.21	8570.43	12577.3	1312.3	0.00128184
32:2	28424.3	25135.2	19893.1	19669.3	15957.5	13367.9	20407.9	2286.1	0.000370206
34:1	0	0	9319.33	9369.73	7180.21	6524.97	5399.04	1768.94	0.414765
36:0	1098.04	1333.33	1392.16	892.157	1068.63	1323.53	1184.64	79.7848	1.35135e-06
36:1	2563.24	2780.65	2278.57	2365.58	1903.06	1703.8	2265.82	164.427	7.08209e-07
