# Supplementary material for: Emergence of Dip2-mediated specific DAG-based PKC signalling axis in eukaryotes
Source: eLife journal article supplement (doi:10.7554/elife.104011), 2025-01-09
Supplement: fig3-data1 [file Figure 3- source data 3A.xlsx]

## Sheet: Sheet1
	Normalized intensities of DAG species					Average	SEM	p-value
DAG	WT
32:0	52728.3	68736.6	55874.6	41748.7	54629.1	54743.4	3847.21	Reference
32:1	813533	713079	412506	479359	500720	583839	68305.8	Reference
34:0	54672.7	88576.5	67245.4	57709.4	43341.8	62309.2	6792.86	Reference
34:1	814272	744310	538296	404546	613729	623031	65202.4	Reference
36:0	85669	68734.1	52905.7	54422.3	54868.3	63319.9	5613.72	Reference
36:1	153411	87935.8	134857	74830.7	78429.5	105893	14336.6	Reference
	ΔDGA1
32:0	367763	443101	288383	576936	401014	415439	42647.8	6.7082e-05
32:1	1778928	1470962	1485465	1443684	1394844	1.51478e+06	60660.6	1.68823e-05
34:0	480622	200402	213229	318009	144139	271280	53128.6	0.00820269
34:1	1892776	1499848	1618222	1131477	1390932	1506651	112380	0.00029496
36:0	632945	264742	217636	172263	257110	308939	73928.6	0.0180604
36:1	838235	1200967	1238549	883385	943805	1.02099e+06	74301	4.71101e-06
