# Supplementary material for: Emergence of Dip2-mediated specific DAG-based PKC signalling axis in eukaryotes
Source: eLife journal article supplement (doi:10.7554/elife.104011), 2025-01-09
Supplement: fig3-data1 [file Figure 3- source data 3B.xlsx]

## Sheet: Sheet1
				Normalized intensities of DAG species
			DAG	WT					Average	SEM	p-value
			32:0	52728.3	68736.6	55874.6	41748.7	54629.1	54743.4	3847.21	Reference
			32:1	813533	713079	412506	479359	500720	583839	68305.8	Reference
			34:0	54672.7	88576.5	67245.4	57709.4	43341.8	62309.2	6792.86	Reference
			34:1	814272	744310	538296	404546	613729	623031	65202.4	Reference
			36:0	85669	68734.1	52905.7	54422.3	54868.3	63319.9	5613.72	Reference
			36:1	153411	87935.8	134857	74830.7	78429.5	105893	14336.6	Reference
				ΔLRO1
			32:0	329141	392293	197392	253560	247510	283979	30675.2	0.000163822
			32:1	921049	484421	559147	540405	585705	618145	69342.5	0.760645
			34:0	528589	615199	309532	380186	447266	456154	48120.9	8.81761e-05
			34:1	759632	434147	597425	477298	469899	547680	53400.9	0.446994
			36:0	251734	310330	361502	389204	256168	313788	24614.6	2.05614e-05
			36:1	306528	563881	654398	789948	671070	597165	72520.5	0.000344273
