# Supplementary material for: Emergence of Dip2-mediated specific DAG-based PKC signalling axis in eukaryotes
Source: eLife journal article supplement (doi:10.7554/elife.104011), 2025-01-09
Supplement: fig3-data1 [file Figure 3- source data 3C.xlsx]

## Sheet: Sheet1
	Normalized intensities of DAG species
DAG	WT					Average	SEM	p-value
32:0	52728.3	68736.6	55874.6	41748.7	54629.1	54743.4	3847.21	Reference
32:1	813533	713079	412506	479359	500720	583839	68305.8	Reference
34:0	54672.7	88576.5	67245.4	57709.4	43341.8	62309.2	6792.86	Reference
34:1	814272	744310	538296	404546	613729	623031	65202.4	Reference
36:0	85669	68734.1	52905.7	54422.3	54868.3	63319.9	5613.72	Reference
36:1	153411	87935.8	134857	74830.7	78429.5	105893	14336.6	Reference
	ΔDGK1
32:0	31688.7	69246.1	62769.1	60634.5	51680.5	55203.8	5828.5	0.954431
32:1	774814	746799	921144	158097	142937	548758	147824	0.852006
34:0	61102.1	62404.6	45674.7	93682.6	41881.1	60949	8174.41	0.911692
34:1	638434	483408	691886	697015	979145	697977	71743.6	0.508839
36:0	86537.6	70059.9	49657	99993.9	92730.5	79795.8	8059.42	0.171906
36:1	115860	163794	184516	97974.4	174266	147282	15239	0.114801
