# Supplementary material for: Emergence of Dip2-mediated specific DAG-based PKC signalling axis in eukaryotes
Source: eLife journal article supplement (doi:10.7554/elife.104011), 2025-01-09
Supplement: fig3-data2 [file elife-104011-fig3-data2-v1.zip]

Figure 3- source data 2

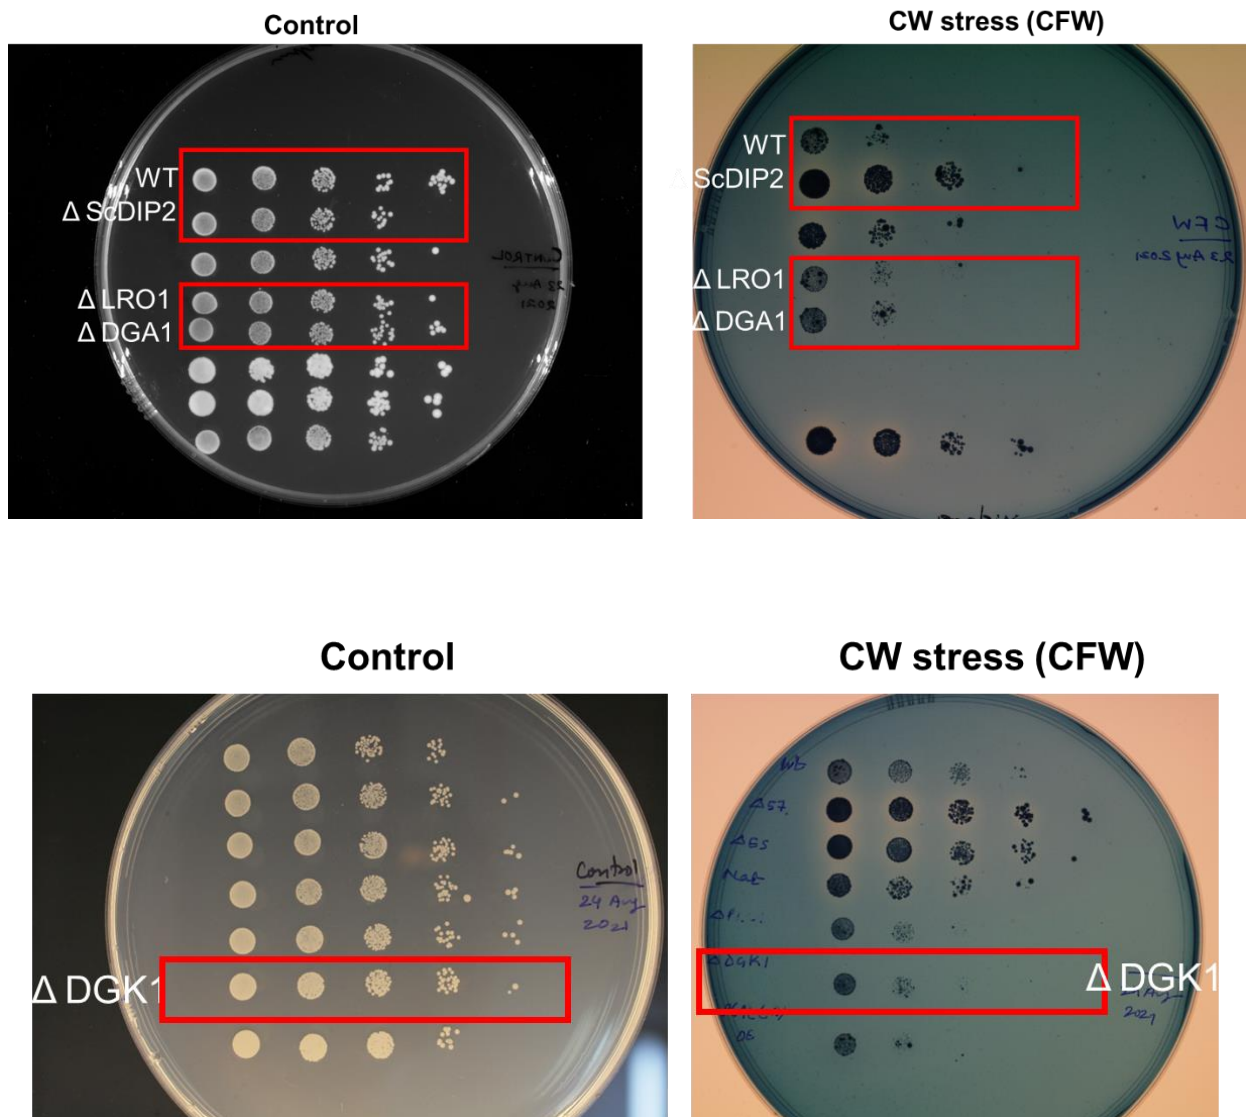

Note:  $\Delta$ DGK1 control and calcofluor white image has been taken from a different plate
