# Supplementary material for: Emergence of Dip2-mediated specific DAG-based PKC signalling axis in eukaryotes
Source: eLife journal article supplement (doi:10.7554/elife.104011), 2025-01-09
Supplement: fig4-data1 [file elife-104011-fig4-data1-v1.zip]

## Sheet: Sheet1
Fig 4B
	DAG	Normalized intensities of DAG species					Average	SEM	p-value										ΔDIP2 (Untreated)						ΔDIP2 (0.5μM U73122)						ΔDIP2 (1μM U73122)
		WT untreated																	1.01972e+06	1.21753e+06	1.13697e+06	1.82657e+06	1.29872e+06	1.41301e+06	232942	446426	318388	103103	246205	312755	132054	93498	102878	113779	132660
	36:0	73759.7	65985.9	66571.2	66689.7	84001	71401.5	3093.03	Reference										1.0494e+06	1.44116e+06	1.5281e+06	1.61172e+06	1.09576e+06	1.44204e+06	162601	349968	230432	185509	238712	214906	86556.1	100467	118662	101131	135863
	36:1	96641.7	103626	89758.8	86428.3	106708	96632.6	3474.47	Reference
		WT (0.5μM U73122)
	36:0	56533.6	52063.6	70335.3	47529.5	36766.9	52645.8	4926.2	0.0203851
	36:1	135135	54088.5	77371.7	87131.9	91163.8	88978.3	11816.4	0.593512
		WT (1μM U73122)
	36:0	37811.8	42977.5	31510.1	42160.7	55306.7	41953.4	3496.39	0.000485728
	36:1	69955.3	58974.8	56289.8	70319.8	81920.5	67492.1	4100.14	0.00127224
		ΔDIP2 (Untreated)
	36:0	1.01972e+06	1.21753e+06	1.13697e+06	1.82657e+06	1.29872e+06	1.2999e+06	124775	Reference
	36:1	1.0494e+06	1.44116e+06	1.5281e+06	1.61172e+06	1.09576e+06	1.34523e+06	102647	Reference
		ΔDIP2 (0.5μM U73122)
	36:0	232942	446426	318388	103103	246205	269413	50303.1	0.000130849
	36:1	162601	349968	230432	185509	238712	233444	28935.3	1.42742e-05
		ΔDIP2 (1μM U73122)
	36:0	132054	93498	102878	113779	132660	114974	6967	2.86232e-05
	36:1	86556.1	100467	118662	101131	135863	108536	7621.99	4.94642e-06
