# Supplementary material for: Emergence of Dip2-mediated specific DAG-based PKC signalling axis in eukaryotes
Source: eLife journal article supplement (doi:10.7554/elife.104011), 2025-01-09
Supplement: fig4-data2 [file elife-104011-fig4-data2-v1.zip]

## Sheet: Sheet2
	Normalized intensities of DAG species						Average	SEM	p-value
DAG	WT
36:0	44580.8	35433.4	42835	39563.1	22839.3	42614.6	37977.7	3013.18	Reference
36:1	38276	18655	28744	22375	31871	20982	26817.2	2793.65	Reference
32:1	159307	229258	136739	237491	177477	155970	182707	15430	Reference
34:1	197443	116143	176975	231719	205990	146133	179067	15708.4	Reference
	ΔPLC1								Compared to WT
36:0	70324.6	52207.8	28594.5	36386.8	32846.6	25884.8	41040.8	6358.85	0.699434
36:1	13822	22874	27652	22765	30283	19897	22882.2	2163.69	0.333317
32:1	343698	109728	150541	181247	184548	241118	201813	30507.6	0.621005
34:1	320497	164511	180110	129356	119550	275887	198319	30450	0.619148
	ΔDIP2								Compared to WT
36:0	635052	779175	823976	946901	482701	759343	737858	59851.2	8.81178e-07
36:1	338176	654254	565244	417615	776561	543144	549166	58894.7	1.07054e-05
32:1	109300	243642	158768	283332	186750	163759	190925	23434.5	0.794616
34:1	122284	263234	210574	127139	130479	177116	171804	21112	0.806178
	ΔPLC1ΔDIP2								Compared to ΔDIP2
36:0	240888	136221	125778	200838	175381	124798	167317	17560.7	8.07593e-06
36:1	187164	109814	116542	202974	111542	176523	150760	15899.7	0.000139013
32:1	185581	172536	137098	134508	177002	264706	178572	17613.8	0.708534
34:1	129393	119055	162142	131261	213253	199675	159130	14766	0.662947
