# Supplementary material for: Emergence of Dip2-mediated specific DAG-based PKC signalling axis in eukaryotes
Source: eLife journal article supplement (doi:10.7554/elife.104011), 2025-01-09
Supplement: fig4-data5 [file elife-104011-fig4-data5-v1.zip]

## Sheet: Sheet1
	Normalized intensities of DAG species					Average	SEM	p-value
DGA1	WT
36:0	85669	68734.1	52905.7	54422.3	54868.3	63319.9	5613.72	Reference
36:1	153411	87935.8	134857	74830.7	78429.5	105893	14336.6	Reference
	ΔPSI
36:0	285476	366678	347065	435048	274853	341824	26073.8	1.41016e-05
36:1	455114	178336	257991	280261	211301	276601	42963.6	0.00976957
	ΔDIP2
36:0	453381	641447	361389	359601	617898	486743	54452.3	0.000122236
36:1	1534334	953920	941138	849862	836251	1.0231e+06	116239	0.000112124
	ΔPSI1ΔDIP2							Compared to ΔDIP2
36:0	253037	379557	249361	335882	334104	310388	22812.4	0.0282836
36:1	425912	536203	328321	389409	555464	447062	38764.9	0.00297692
