# Supplementary material for: Emergence of Dip2-mediated specific DAG-based PKC signalling axis in eukaryotes
Source: eLife journal article supplement (doi:10.7554/elife.104011), 2025-01-09
Supplement: fig4-data6 [file elife-104011-fig4-data6-v1.zip]

Figure 4- source data 6

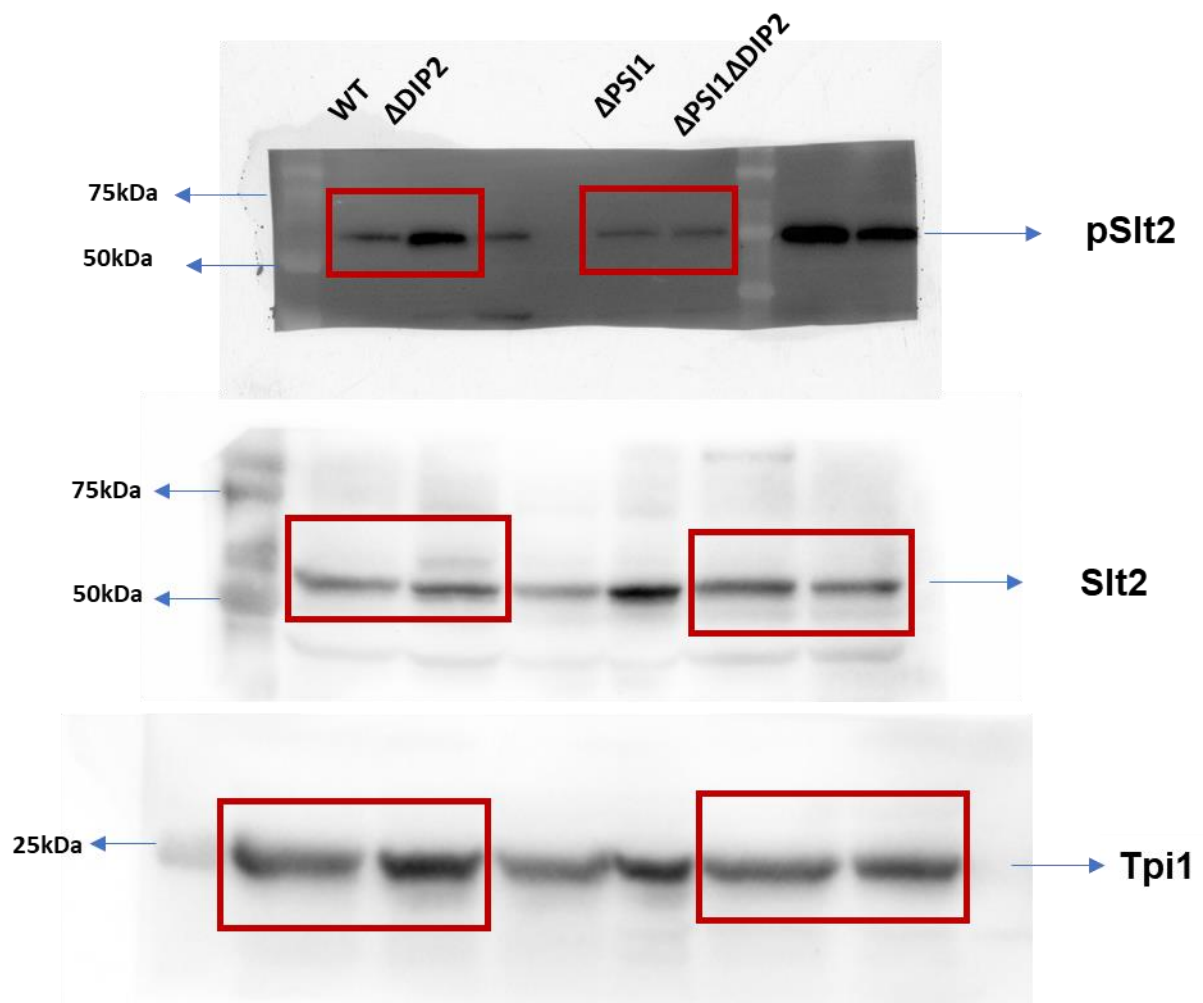

Whole blot was cut into 2 parts and probed for pSlt2 (M.W 56KDa) and Tpi1 (27KDa).  
pSlt2 blot is stripped and probed again for total Slt2 levels.
