# Supplementary material for: Emergence of Dip2-mediated specific DAG-based PKC signalling axis in eukaryotes
Source: eLife journal article supplement (doi:10.7554/elife.104011), 2025-01-09
Supplement: fig4-figsupp1-data1 [file elife-104011-fig4-figsupp1-data1-v1.zip]

## Sheet: Sheet1
	Normalized intensities of DAG species						Average	SEM	p-value
DAG	WT Untreated
32:0	66119.2	45209.2	48000	44943.6	34621.4	51006.9	48316.7	3847.3	Reference
32:1	602981	403185	388759	41733.8	378541	532211	391235	72105.6	Reference
34:0	30903.7	41735.6	62349.2	37679.7	45019.9	31656.4	41557.4	4316.92	Reference
34:1	274938	358507	443645	533421	639603	617606	477953	54101.1	Reference
	WT (0.5μM U73122)
32:0	63015.6	52106.1	36526	31161.3	34413.2	45846.1	43844.7	4543.51	0.508487
32:1	709591	408854	336135	488348	229145	554405	454413	63042.4	0.560479
34:0	61085.6	17158.8	12697.1	38831.6	38671.3	44668.4	35518.8	6700.34	0.504926
34:1	388944	108957	481390	342447	408912	323463	342352	47364.7	0.115888
	WT (1μM U73122)
32:0	64728.5	47058.9	51235.6	52738.2	47910.2		52734.3	2839.64	0.434541
32:1	870362	719078	427201	630901	801970		689902	68838.8	0.0249164
34:0	29641.2	51965.1	65555	61483.3	42922.7		50313.5	5802.64	0.440653
34:1	441151	348240	356655	429242	416988		398455	17184.9	0.462577
	ΔDIP2 (Untreated)
32:0	69949.1	35628.6	49759.5	50023.5	53091.5	38482.4	49489.1	4549.75	0.861042
32:1	792401	715848	395610	330237	478071	321514	505613	75268.9	0.340102
34:0	20537.7	33400.8	45809.3	36485.6	26752.9	33292.4	32713.1	3207.27	0.164186
34:1	411442	253712	252036	265152	438451	615959	372792	54079	0.238025
	ΔDIP2 (0.5μM U73122)								Compared to ΔDIP2
32:0	44616.5	55023.7	56312.1	52096.2	80423.4	64618.9	58848.5	4618.74	0.216949
32:1	759498	568806	382437	469387	280638	349988	468459	64868.6	0.73991
34:0	29470.8	21414.6	18195.5	12917.6	35707	25064.9	23795.1	3032.52	0.0949134
34:1	505907	300754	422230	510861	531436	402021	445535	32782.7	0.318408
	ΔDIP2 (1μM U73122)								Compared to ΔDIP2
32:0	70108.9	102908	54436	63280.5	43406.7		66828	9004.96	0.223098
32:1	645060	498175	364136	472041	563412		508565	41924.2	0.747889
34:0	29474.5	24543.2	13608.6	33936.7	54143.8		31141.4	5968.71	0.859058
34:1	271036	429941	519584	551045	682387		490799	61045.4	0.0703284
