# Supplementary material for: Emergence of Dip2-mediated specific DAG-based PKC signalling axis in eukaryotes
Source: eLife journal article supplement (doi:10.7554/elife.104011), 2025-01-09
Supplement: fig4-figsupp1-data1 [file Figure 4. figure supplement 1B.xlsx]

## Sheet: Sheet1
	Normalized intensities of DAG species						Average	SEM	p-value
DAG	WT (Untreated)
32:1	158152	223878	149583	110362	111528	112222	144288	16505.3	Reference
34:1	128485	203607	141724	104624	144123	120837	140566	12709.5	Reference
36:0	22270.4	22757	12147.2	22985.4	21611.9	21360.8	20522.1	1546.94	Reference
36:1	42373.8	30814.8	54826.1	49561.4	66922.6	47719.7	48703.1	4506.78	Reference
	WT (1mM Propranolol)
32:1	145923	125598	99076.4	207346	174514	92880.5	140890	16549.1	0.887761
34:1	122255	110682	85914.7	189136	168821	197519	145721	17042.9	0.814063
36:0	21455.7	12265.2	21466.7	22998.4	20672.7	21583	20073.6	1453.1	0.837537
36:1	42709.7	36322.3	25949.3	61409	60676.5	33587.8	43442.4	5462.41	0.475914
	ΔDIP2 (Untreated)
32:1	286506	137176	122565	321443	107343	220530	199260	33820.8	0.211955
34:1	186392	137913	208224	281699	262046	200509	212797	19472	0.0176789
36:0	804746	702283	635278	967009	556853	421040	681202	71229.2	7.15276e-06
36:1	283090	495052	531491	695578	546825	703865	542650	57531.7	1.44662e-05
	ΔDIP2 (1mM Propranolol)								Compared to ΔDIP2
32:1	187025	233628	204974	129667	132357	130997	169775	16771.6	0.492144
34:1	283550	223706	179193	186074	153139	183928	201598	17166.2	0.701972
36:0	810389	583208	458836	677917	575348	405919	585270	54649.6	0.352348
36:1	476610	604595	638708	626604	672633	477431	582763	31608.8	0.589225
