# Supplementary material for: Emergence of Dip2-mediated specific DAG-based PKC signalling axis in eukaryotes
Source: eLife journal article supplement (doi:10.7554/elife.104011), 2025-01-09
Supplement: fig4-figsupp1-data1 [file Figure 4. figure supplement 1C.xlsx]

## Sheet: Sheet1
	Normalized intensities of DAG species						Average	SEM	p-value
DAG	WT
32:1	113481	259289	257502	166001	115963	288723	200160	29057.9	Reference
34:1	235923	243220	170485	264404	230919	167306	218709	15002	Reference
36:0	33860	23883.2	32252.4	34413.4	22327.2	23020.5	28292.8	2153.58	Reference
36:1	47147.4	42039.6	31289.2	32659.5	36100.7	24301	35589.6	3027.46	Reference
	WT + aurA
32:1	101991	126826	148373	189956	289498	234217	181810	26311.1	0.678204
34:1	361181	236566	225762	162971	294840	229594	251819	25336.9	0.328855
36:0	28210.9	28726	21098	21404.7	24917.3	23894	24708.5	1214.1	0.215129
36:1	56619.6	32029.9	32187.7	22609.5	27388.4	31606.2	33740.2	4402	0.758504
	ΔDIP2
32:1	243700	235674	133593	225486	209929	148958	199557	17436	0.987362
34:1	122873	113170	254531	105034	350093	340296	214333	42965.9	0.931779
36:0	765363	803119	424664	718404	924862	858612	749171	65036.1	1.43389e-06
36:1	677340	627017	859550	765914	695450	801278	737758	32216.6	2.35712e-09
	ΔDIP2 + aurA								Compared to ΔDIP2
32:1	154013	168680	127051	278828	288101	211909	204763	24943.6	0.879
34:1	159859	152253	137704	255605	134157	140253	163305	17231.9	0.338025
36:0	493378	911541	849641	631896	491202	639802	669576	65857.5	0.450641
36:1	425068	819748	757124	567142	433057	431459	572266	65895.4	0.0664279
