# Supplementary material for: Emergence of Dip2-mediated specific DAG-based PKC signalling axis in eukaryotes
Source: eLife journal article supplement (doi:10.7554/elife.104011), 2025-01-09
Supplement: fig4-figsupp2-data1 [file elife-104011-fig4-figsupp2-data1-v1.zip]

## Sheet: Sheet2
	Normalized intensities of DAG species						Average	SEM	p-value
DAG	WT
36:0	44580.8	35433.4	42835	39563.1	22839.3	42614.6	37977.7	3013.18	Reference
36:1	38276	18655	28744	22375	31871	20982	26817.2	2793.65	Reference
32:1	159307	229258	136739	237491	177477	155970	182707	15430	Reference
34:1	197443	116143	176975	231719	205990	146133	179067	15708.4	Reference
	ΔPLC1								Compared to WT
36:0	70324.6	52207.8	28594.5	36386.8	32846.6	25884.8	41040.8	6358.85	0.699434
36:1	13822	22874	27652	22765	30283	19897	22882.2	2163.69	0.333317
32:1	343698	109728	150541	181247	184548	241118	201813	30507.6	0.621005
34:1	320497	164511	180110	129356	119550	275887	198319	30450	0.619148
	ΔDIP2								Compared to WT
36:0	635052	779175	823976	946901	482701	759343	737858	59851.2	8.81178e-07
36:1	338176	654254	565244	417615	776561	543144	549166	58894.7	1.07054e-05
32:1	109300	243642	158768	283332	186750	163759	190925	23434.5	0.794616
34:1	122284	263234	210574	127139	130479	177116	171804	21112	0.806178
	ΔPLC1ΔDIP2								Compared to ΔDIP2
36:0	240888	136221	125778	200838	175381	124798	167317	17560.7	8.07593e-06
36:1	187164	109814	116542	202974	111542	176523	150760	15899.7	0.000139013
32:1	185581	172536	137098	134508	177002	264706	178572	17613.8	0.708534
34:1	129393	119055	162142	131261	213253	199675	159130	14766	0.662947

## Sheet: Sheet1
	Normalized intensities of DAG species						Average	SEM	p-value
DAG	WT
32:1	7329.37	3880.51	2803.91	7696.22	4235.52	4925.76	5145.21	730.963	Reference
32:2	9180.76	5007.56	3510.41	10272.6	5661.91	6140.19	6628.91	962.005	Reference
34:1	4419.13	2621.36	1921.12	4588.45	2564.87	3211.3	3221.04	400.877	Reference
36:0	1372.55	1656.86	1990.2	1323.53	1803.92	1156.86	1550.65	118.673	Reference
36:1	476.456	336.348	219.262	524.378	274.583	382.918	368.991	43.5524
	ΔPAH1								Compared to WT
32:1	7397.68	6686.7	4949.74	7132.32	8337.46	11194.5	7616.4	774.244	0.0601627
32:2	5190.45	4159.46	3246.63	4563.3	5515.64	7820.46	5082.66	581.848	0.237842
34:1	1670.92	1658.42	1220.28	1763.65	2079.93	2619.96	1835.53	176.165	0.0161495
36:0	1784.31	1470.59	2009.8	1362.75	1421.57	1205.88	1542.48	110.838	0.964271
36:1	315.775	314.258	222.734	315.568	424.597	519.248	352.03	38.7355	0.795915
	ΔDIP2								Compared to WT
32:1	3983.46	6464.43	4600.14	6702.56	5371.11	8786.32	5984.67	643.191	0.449503
32:2	4802.21	7498.6	5515.93	8688.24	6321.29	11294.2	7353.41	886.362	0.624089
34:1	2605.31	3796.52	3176.83	4576.97	3408.39	5535.6	3849.94	393.348	0.330771
36:0	3607.84	4754.9	5343.14	6245.1	5176.47	5970.59	5183.01	351.126	4.36635e-06
36:1	10351.3	9520.05	8445.7	9651.23	7450.84	6780.77	8699.98	516.734	4.34106e-08
	ΔPAH1ΔDIP2								Compared to ΔDIP2
32:1	10748.2	10536.2	8122.27	13336.4	7747.02	9701.85	10032	757.613	0.00399062
32:2	11428	10426.9	8347.43	13355	8569.81	9508.36	10272.6	708.086	0.0407129
34:1	7270.79	8031.31	6699.93	10600.5	5976.87	7832.81	7735.37	593.63	0.000552824
36:0	2441.18	2294.12	3450.98	2911.76	3333.33	3431.37	2977.12	191.179	0.000509049
36:1	1573.87	1696.74	1374.46	2397.97	1243.69	1605.25	1648.66	150.041	3.00776e-07
