# Supplementary material for: Emergence of Dip2-mediated specific DAG-based PKC signalling axis in eukaryotes
Source: eLife journal article supplement (doi:10.7554/elife.104011), 2025-01-09
Supplement: fig5-data1 [file elife-104011-fig5-data1-v1.zip]

## Sheet: Sheet1
Interspecies coevolution plot (using patristic distance)
Bayesian method			Neighbour joining method			Maximum likelihood method
DIP2	PKC1		DIP2	PKC1		DIP2	PKC1
2.64565	3.14973		0.242298	0.308747		0.160104	0.27153
1.81442	3.04393		0.282971	0.301668		0.300315	0.382645
2.33065	3.70326		0.292883	0.282609		0.301269	0.39944
2.31941	3.75501		0.357744	0.300492		0.52418	0.469389
2.28194	3.74958		0.403693	0.321116		0.57377	0.443219
2.3958	3.69323		0.476886	0.436724		0.55755	0.753249
2.4131	3.73866		0.548181	0.414822		0.641947	0.710853
2.41944	3.74792		0.478722	0.482755		0.754259	0.755607
2.50768	3.75184		0.367305	0.44025		0.731718	0.788894
2.48247	3.53129		0.456275	0.464799		0.755909	0.822141
2.60052	3.68394		0.466959	0.44518		0.779235	0.802902
2.24898	3.68919		0.471615	0.495513		0.750953	0.827771
2.2916	3.68647		0.621453	0.568671		0.89714	0.949885
2.29259	3.63899		0.611821	0.546993		0.86365	0.960563
2.26059	3.71653		0.819685	0.795106		1.18242	1.32415
2.24363	3.53961		0.851224	0.790549		1.38874	1.29398
2.14916	3.46905		0.955741	0.775073		1.22695	1.36302
2.49705	4.4212		0.908269	1.08885		1.43234	1.78169
2.99321	5.40857		0.977529	1.25401		1.41901	1.98987
2.66549	5.41396		0.975409	1.52353		1.56542	2.3793
2.95854	4.78475		0.977162	1.56797		1.56429	2.40346
2.83827	3.7627		0.927774	1.10005		1.79947	1.65484
2.96361	3.71555		0.843708	1.13996		1.46952	1.93473
2.37384	3.56874		0.927208	1.35204		1.61461	2.08842
1.95073	3.65132		0.914402	1.45418		1.72795	2.18334
2.04526	3.29492		0.893598	1.29983		1.75805	1.98996
2.49292	3.95879		1.05062	1.53961		1.53042	2.532
2.45146	3.45636		1.19871	1.44151		1.41604	2.32937
2.51956	3.45011		0.95477	1.73753		1.40428	2.70833
0.137295	0.109423		0.933613	1.60366		1.51037	2.51358
0.146812	0.161399		1.15236	1.41259		1.48002	2.46826
0.72849	0.794891		1.24192	1.50834		1.48673	2.47023
0.745796	0.840321		0.35085	0.346727		0.298111	0.392654
0.752131	0.849577		0.360763	0.327668		0.299065	0.409449
0.840376	0.853498		0.425623	0.345551		0.521976	0.479398
0.815161	0.724585		0.471572	0.366175		0.571566	0.453228
0.93321	0.877243		0.544766	0.481783		0.555345	0.763258
0.685428	0.882485		0.616061	0.459881		0.639742	0.720862
0.72804	0.879768		0.546601	0.527814		0.752055	0.765616
0.729039	0.832287		0.435184	0.485309		0.729514	0.798903
0.697039	0.909835		0.524155	0.509858		0.753705	0.83215
1.0973	1.22269		0.534838	0.490238		0.77703	0.812911
1.00283	1.15212		0.539495	0.540571		0.748748	0.83778
1.49068	2.32323		0.689333	0.61373		0.894935	0.959894
1.98685	3.31059		0.679701	0.592052		0.861445	0.970572
1.79464	3.31598		0.887564	0.840165		1.18021	1.33416
2.08769	2.68677		0.919104	0.835608		1.38654	1.30399
1.96742	1.66472		1.02362	0.820132		1.22475	1.37303
2.09276	1.772		0.976149	1.1339		1.43014	1.7917
1.50299	1.62519		1.04541	1.29907		1.41681	1.99988
1.54607	2.48664		1.04329	1.56858		1.56321	2.38931
1.64061	2.13024		1.04504	1.61302		1.56208	2.41347
2.28382	3.26865		0.995653	1.14511		1.79727	1.66485
2.24236	2.76622		0.911588	1.18502		1.46732	1.94474
2.31047	3.13592		0.995088	1.3971		1.61241	2.09843
0.544722	0.327673		0.982281	1.49924		1.72575	2.19335
0.551057	0.583903		0.961478	1.34489		1.75585	1.99997
0.639302	0.587824		1.1185	1.58467		1.52822	2.54201
0.614087	0.714556		1.26659	1.48657		1.41383	2.33938
0.732136	0.867214		1.02265	1.78259		1.40208	2.71834
0.750575	0.872455		1.00149	1.64872		1.50817	2.52359
0.793186	0.869738		1.22024	1.45765		1.47781	2.47827
0.794185	0.822257		1.3098	1.5534		1.48452	2.48024
0.762186	0.899805		0.303252	0.300125		0.215826	0.400503
1.16245	1.21266		0.368112	0.318007		0.518288	0.470453
1.06797	1.14209		0.414062	0.338632		0.567878	0.444282
1.55583	2.3132		0.487255	0.45424		0.551657	0.754313
2.052	3.30056		0.55855	0.432338		0.636054	0.711917
1.85978	3.30595		0.48909	0.500271		0.748367	0.75667
2.15283	2.67674		0.377674	0.457766		0.725826	0.789958
2.03257	1.65469		0.466644	0.482315		0.750017	0.823205
2.15791	1.76197		0.477328	0.462695		0.773342	0.803966
1.56813	1.61517		0.481984	0.513028		0.74506	0.828835
1.61122	2.47661		0.631822	0.586187		0.891247	0.950949
1.70576	2.12021		0.62219	0.564509		0.857757	0.961627
2.34897	3.25862		0.830054	0.812622		1.17653	1.32522
2.30751	2.75619		0.861593	0.808064		1.38285	1.29505
2.37561	3.12589		0.96611	0.792588		1.22106	1.36409
0.52453	2.03279		0.918638	1.10636		1.42645	1.78275
2.09955	3.39145		0.987898	1.27152		1.41312	1.99093
0.135569	0.213153		0.985778	1.54104		1.55953	2.38036
0.717247	0.846645		0.987531	1.58548		1.55839	2.40453
0.734553	0.892076		0.938143	1.11757		1.79358	1.65591
0.740888	0.901332		0.854077	1.15748		1.46363	1.9358
0.829133	0.905252		0.937577	1.36956		1.60872	2.08948
0.803918	0.77634		0.92477	1.47169		1.72206	2.1844
0.921966	0.928998		0.903967	1.31734		1.75216	1.99103
0.674185	0.934239		1.06099	1.55713		1.52453	2.53307
0.716797	0.931523		1.20908	1.45903		1.41015	2.33043
0.717796	0.884041		0.965139	1.75505		1.39839	2.70939
0.685796	0.961589		0.943982	1.62117		1.50448	2.51464
1.08606	1.27444		1.16273	1.4301		1.47412	2.46932
0.991585	1.20388		1.25229	1.52585		1.48083	2.4713
1.47944	2.37498		0.36516	0.243559		0.519242	0.353083
1.97561	3.36235		0.411109	0.313891		0.568832	0.41292
1.78339	3.36774		0.484302	0.429499		0.552612	0.72295
2.07645	2.73853		0.555597	0.407597		0.637009	0.680554
1.95618	1.71648		0.486138	0.47553		0.749321	0.725308
2.08152	1.82376		0.374721	0.433025		0.72678	0.758595
1.49174	1.67695		0.463691	0.457574		0.750971	0.791843
1.53483	2.53839		0.474375	0.437954		0.774297	0.772604
1.62937	2.182		0.479032	0.488287		0.746014	0.797473
2.27258	3.3204		0.62887	0.561446		0.892202	0.919586
2.23112	2.81797		0.619238	0.539768		0.858711	0.930264
2.29922	3.18768		0.827101	0.787881		1.17748	1.29385
0.444943	0.520099		0.858641	0.783324		1.38381	1.26368
0.837246	0.52534		0.963158	0.767847		1.22202	1.33272
0.879857	0.522623		0.915686	1.08162		1.42741	1.75139
0.880856	0.475142		0.984945	1.24678		1.41407	1.95957
0.848857	0.55269		0.982825	1.5163		1.56048	2.349
1.24912	1.05071		0.984579	1.56074		1.55935	2.37317
1.15465	0.980145		0.93519	1.09283		1.79454	1.62454
1.6425	2.15125		0.851124	1.13274		1.46458	1.90443
2.13867	3.13862		0.934624	1.34482		1.60968	2.05812
1.94645	3.14401		0.921818	1.44695		1.72301	2.15304
2.2395	2.5148		0.901014	1.2926		1.75311	1.95966
2.11924	1.49275		1.05803	1.53239		1.52548	2.5017
2.24458	1.60003		1.20613	1.43429		1.4111	2.29907
1.6548	1.45322		0.962186	1.7303		1.39934	2.67803
1.69789	2.31467		0.94103	1.59643		1.50543	2.48328
1.79243	1.95827		1.15978	1.40536		1.47508	2.43796
2.43564	3.09667		1.24934	1.50111		1.48179	2.43993
2.39418	2.59424		0.420939	0.331773		0.138679	0.482869
2.46228	2.96395		0.494132	0.447381		0.122458	0.7929
1.88047	2.80103		0.565427	0.425479		0.584171	0.750504
1.96103	2.80642		0.495968	0.493413		0.696483	0.795257
2.25408	2.17721		0.384551	0.450907		0.673942	0.828545
2.13382	1.68118		0.473521	0.475456		0.698133	0.861792
2.25916	2.48994		0.484205	0.455837		0.721459	0.842553
1.66938	2.34314		0.488862	0.50617		0.693176	0.867422
1.71247	3.20458		0.638699	0.579328		0.839364	0.989536
1.807	2.84818		0.629067	0.55765		0.805873	1.00021
2.45022	3.98659		0.836931	0.805763		1.12464	1.3638
2.40876	3.48416		0.86847	0.801206		1.33097	1.33363
2.47686	3.85386		0.972987	0.78573		1.16918	1.40267
0.463603	0.481332		0.925515	1.0995		1.37457	1.82134
0.438388	0.769242		0.994775	1.26466		1.36123	2.02952
0.556436	0.9219		0.992655	1.53418		1.50764	2.41895
0.774216	0.927142		0.994409	1.57862		1.50651	2.44312
0.816827	0.924425		0.94502	1.11071		1.7417	1.69449
0.817826	0.876944		0.860954	1.15062		1.41174	1.97438
0.785827	0.954492		0.944454	1.3627		1.55684	2.12807
1.18609	1.26734		0.931648	1.46484		1.67017	2.22299
1.09162	1.19678		0.910844	1.31048		1.70027	2.02961
1.57947	2.36788		1.06786	1.55027		1.47264	2.57165
2.07564	3.35525		1.21596	1.45217		1.35826	2.36902
1.88342	3.36064		0.972016	1.74819		1.3465	2.74798
2.17647	2.73143		0.95086	1.61431		1.45259	2.55323
2.05621	1.70938		1.16961	1.42324		1.42224	2.50791
2.18155	1.81666		1.25917	1.519		1.42895	2.50988
1.59177	1.66985		0.474328	0.415729		0.128039	0.604834
1.63486	2.5313		0.545623	0.393827		0.633761	0.562438
1.7294	2.1749		0.476163	0.461761		0.746073	0.607192
2.37261	3.3133		0.364747	0.419256		0.723532	0.640479
2.33115	2.81088		0.453717	0.443804		0.747723	0.673727
2.39925	3.18058		0.464401	0.424185		0.771049	0.654488
1.64321	0.679116		0.469057	0.474518		0.742766	0.679357
2.89238	3.17309		0.618895	0.547676		0.888954	0.80147
2.88113	3.22484		0.609263	0.525999		0.855463	0.812148
2.84367	3.2194		0.817127	0.774112		1.17423	1.17574
2.95752	3.16306		0.848666	0.769554		1.38056	1.14557
2.97483	3.20849		0.953183	0.754078		1.21877	1.21461
2.98116	3.21774		0.905711	1.06785		1.42416	1.63327
3.06941	3.22166		0.974971	1.23301		1.41082	1.84146
3.04419	3.00111		0.972851	1.50253		1.55723	2.23089
3.16224	3.15377		0.974604	1.54697		1.5561	2.25505
2.81071	3.15901		0.925215	1.07906		1.79129	1.50643
2.85332	3.1563		0.84115	1.11897		1.46133	1.78632
2.85432	3.10881		0.92465	1.33105		1.60643	1.94
2.82232	3.18636		0.911843	1.43318		1.71976	2.03492
2.80536	3.00944		0.89104	1.27883		1.74986	1.84155
2.71088	2.93887		1.04806	1.51862		1.52224	2.38359
3.05877	3.89103		1.19615	1.42051		1.40785	2.18095
3.55494	4.87839		0.952212	1.71654		1.39609	2.55991
3.22721	4.88378		0.931055	1.58266		1.50218	2.36516
3.52026	4.25457		1.1498	1.39159		1.47183	2.31984
3.4	3.23252		1.23936	1.48734		1.47854	2.32182
3.52534	3.18538		0.159114	0.070662		0.61754	0.135901
2.93556	3.03857		0.089655	0.138596		0.729853	0.180655
2.51245	3.12115		0.358453	0.457397		0.707312	0.748069
2.60699	2.76475		0.447423	0.481946		0.731503	0.781317
3.05464	3.42862		0.458107	0.462327		0.754828	0.762078
3.01318	2.92619		0.462763	0.51266		0.726546	0.786946
3.08128	2.91994		0.612601	0.585818		0.872733	0.90906
0.679782	0.841207		0.602969	0.56414		0.839243	0.919738
0.697088	0.886638		0.810833	0.812253		1.15801	1.28333
0.703423	0.895894		0.842372	0.807696		1.36434	1.25316
0.791668	0.899814		0.946889	0.79222		1.20255	1.3222
0.766453	0.770902		0.899417	1.10599		1.40794	1.74086
0.884502	0.92356		0.968677	1.27115		1.3946	1.94904
0.636721	0.928801		0.966557	1.54067		1.54101	2.33848
0.679332	0.926085		0.96831	1.58511		1.53988	2.36264
0.680331	0.878603		0.918921	1.1172		1.77507	1.61402
0.648332	0.956151		0.834856	1.15711		1.44511	1.89391
1.0486	1.269		0.918356	1.36919		1.59021	2.04759
0.954121	1.19844		0.905549	1.47132		1.70354	2.14251
1.44198	2.36954		0.884746	1.31697		1.73364	1.94914
1.93814	3.35691		1.04176	1.55676		1.50601	2.49118
1.74593	3.3623		1.18986	1.45866		1.39163	2.28854
2.03898	2.73309		0.945918	1.75468		1.37987	2.6675
1.91872	1.71104		0.924761	1.62081		1.48596	2.47275
2.04406	1.81832		1.14351	1.42973		1.45561	2.42743
1.45428	1.67151		1.23307	1.52549		1.46232	2.42941
1.49737	2.53296		0.12964	0.085591		0.519439	0.084033
1.5919	2.17656		0.429748	0.435496		0.496899	0.705673
2.23511	3.31496		0.518718	0.460044		0.52109	0.73892
2.19366	2.81254		0.529402	0.440425		0.544415	0.719681
2.26176	3.18224		0.534058	0.490758		0.516133	0.74455
2.4572	1.05773		0.683896	0.563916		0.830415	0.866664
2.75025	2.67893		0.674264	0.542238		0.796925	0.877342
2.62999	2.66855		0.882128	0.790351		1.11569	1.24093
2.75533	3.47731		0.913667	0.785794		1.32202	1.21076
2.16555	3.3305		1.01818	0.770318		1.16023	1.2798
2.20863	4.19195		0.970712	1.08409		1.36562	1.69847
2.30317	3.83555		1.03997	1.24925		1.35228	1.90665
2.94638	4.97395		1.03785	1.51877		1.49869	2.29608
2.90492	4.47153		1.0396	1.56321		1.49756	2.32024
2.97303	4.84123		0.990216	1.0953		1.73275	1.57162
0.955295	0.328974		0.906151	1.13521		1.4028	1.85151
0.997906	0.457412		0.989651	1.34729		1.54789	2.0052
0.998905	0.466687		0.976844	1.44942		1.66122	2.10012
0.966906	0.544235		0.956041	1.29507		1.69132	1.90674
1.36717	1.20337		1.11306	1.53486		1.4637	2.44878
1.27269	1.1328		1.26115	1.43676		1.34932	2.24615
1.76055	2.30391		1.01721	1.73278		1.33756	2.62511
2.25672	3.29128		0.996056	1.5989		1.44365	2.43036
2.0645	3.29667		1.2148	1.40783		1.41329	2.38504
2.35755	2.66746		1.30436	1.50358		1.42	2.38701
2.23729	1.64541		0.360288	0.503429		0.448497	0.750427
2.36263	1.75269		0.449258	0.527978		0.472688	0.783674
1.77285	1.60588		0.459942	0.508358		0.496014	0.764435
1.81594	2.46732		0.464599	0.558691		0.467731	0.789304
1.91048	2.11093		0.614437	0.63185		0.942727	0.911417
2.55369	3.24933		0.604805	0.610172		0.909237	0.922096
2.51223	2.7469		0.812668	0.858285		1.228	1.28569
2.58033	3.1166		0.844208	0.853727		1.43433	1.25552
0.440494	0.773163		0.948725	0.838251		1.27254	1.32455
0.558543	0.925821		0.901253	1.15203		1.47793	1.74322
0.862461	0.931062		0.970512	1.31719		1.4646	1.9514
0.905072	0.928346		0.968392	1.5867		1.61101	2.34083
0.906071	0.880864		0.970146	1.63115		1.60987	2.365
0.874072	0.958412		0.920757	1.16323		1.84506	1.61638
1.27434	1.27126		0.836691	1.20314		1.51511	1.89627
1.17986	1.2007		0.920191	1.41522		1.6602	2.04995
1.66772	2.37181		0.907385	1.51736		1.77354	2.14487
2.16388	3.35917		0.886581	1.36301		1.80364	1.95149
1.97167	3.36456		1.0436	1.60279		1.57601	2.49354
2.26472	2.73535		1.19169	1.50469		1.46163	2.2909
2.14446	1.7133		0.947753	1.80071		1.44987	2.66986
2.2698	1.82058		0.926597	1.66684		1.55596	2.47511
1.68002	1.67377		1.14534	1.47576		1.5256	2.42979
1.72311	2.53522		1.2349	1.57152		1.53231	2.43176
1.81764	2.17882		0.210317	0.253401		0.251951	0.272431
2.46085	3.31722		0.221001	0.343268		0.395528	0.476669
2.4194	2.8148		0.225658	0.393601		0.367246	0.501537
2.4875	3.1845		0.468625	0.553235		0.920186	0.838842
2.06114	3.0673		0.458993	0.531557		0.886696	0.84952
2.0499	3.11905		0.666857	0.77967		1.20546	1.21311
2.01243	3.11361		0.698396	0.775113		1.41179	1.18294
2.12629	3.05727		0.802913	0.759637		1.25	1.25198
2.14359	3.1027		0.755441	1.07341		1.45539	1.67065
2.14993	3.11195		0.824701	1.23857		1.44206	1.87883
2.23818	3.11587		0.822581	1.50809		1.58847	2.26826
2.21296	2.89532		0.824335	1.55253		1.58733	2.29242
2.33101	3.04798		0.774946	1.08462		1.82252	1.5438
1.97947	3.05322		0.69088	1.12453		1.49257	1.82369
2.02209	3.0505		0.77438	1.33661		1.63766	1.97737
2.02309	3.00302		0.761574	1.43874		1.751	2.07229
1.99108	3.08057		0.74077	1.28439		1.7811	1.87892
1.97412	2.90365		0.897788	1.52418		1.55347	2.42096
1.87965	2.83308		1.04588	1.42607		1.43909	2.21833
2.22754	3.78524		0.801942	1.72209		1.42733	2.59728
2.7237	4.7726		0.780786	1.58822		1.53342	2.40253
2.39598	4.77799		0.999533	1.39715		1.50306	2.35721
2.68903	4.14878		1.08909	1.4929		1.50977	2.35919
2.56876	3.12673		0.222223	0.367816		0.419719	0.509916
2.6941	3.07958		0.226879	0.418149		0.391437	0.534785
2.10433	2.93278		0.557596	0.577783		0.944377	0.872089
1.68122	3.01536		0.547964	0.556105		0.910887	0.882767
1.77575	2.65896		0.755827	0.804218		1.22965	1.24636
2.22341	3.32282		0.787367	0.799661		1.43598	1.21619
2.18195	2.8204		0.891884	0.784185		1.27419	1.28523
2.25005	2.81415		0.844412	1.09796		1.47958	1.70389
0.740275	0.845386		0.913671	1.26312		1.46625	1.91207
1.40366	2.15958		0.911551	1.53264		1.61266	2.30151
1.89983	3.14694		0.913305	1.57708		1.61152	2.32567
1.70762	3.15233		0.863916	1.10916		1.84671	1.57705
2.00067	2.52312		0.779851	1.14908		1.51676	1.85694
1.88041	1.50107		0.863351	1.36115		1.66185	2.01062
2.00575	1.60835		0.850544	1.46329		1.77519	2.10554
1.41597	1.46155		0.829741	1.30894		1.80529	1.91216
1.45905	2.32299		0.986759	1.54872		1.57766	2.45421
1.55359	1.9666		1.13485	1.45062		1.46328	2.25157
2.1968	3.105		0.890913	1.74664		1.45152	2.63053
2.15534	2.60257		0.869756	1.61277		1.55761	2.43578
2.22345	2.97227		1.0885	1.4217		1.52725	2.39046
0.395355	0.469212		1.17806	1.51745		1.53396	2.39243
0.363355	0.54676		0.151326	0.343601		0.337064	0.387347
1.05825	1.20589		0.568279	0.558164		0.967703	0.85285
0.963771	1.13533		0.558647	0.536486		0.934213	0.863528
1.45163	2.30644		0.766511	0.784599		1.25298	1.22712
1.94779	3.2938		0.79805	0.780042		1.45931	1.19695
1.75558	3.29919		0.902567	0.764566		1.29752	1.26599
2.04863	2.66998		0.855095	1.07834		1.50291	1.68465
1.92837	1.64793		0.924355	1.2435		1.48957	1.89283
2.05371	1.75521		0.922235	1.51302		1.63598	2.28227
1.46393	1.6084		0.923989	1.55746		1.63485	2.30643
1.50702	2.46985		0.8746	1.08955		1.87004	1.55781
1.60155	2.11345		0.790534	1.12946		1.54008	1.8377
2.24477	3.25185		0.874034	1.34154		1.68518	1.99138
2.2033	2.74943		0.861228	1.44367		1.79851	2.0863
2.27141	3.11913		0.840424	1.28932		1.82861	1.89293
0.274018	0.629334		0.997442	1.5291		1.60098	2.43497
0.457268	0.633255		1.14554	1.431		1.4866	2.23233
0.432053	0.759986		0.901596	1.72702		1.47484	2.61129
0.550102	0.912644		0.88044	1.59315		1.58093	2.41654
0.767881	0.917886		1.09919	1.40208		1.55058	2.37122
0.810492	0.915169		1.18874	1.49783		1.55729	2.3732
0.811491	0.867688		0.572936	0.608497		0.939421	0.877719
0.779492	0.945236		0.563304	0.586819		0.90593	0.888397
1.17976	1.25809		0.771168	0.834932		1.2247	1.25199
1.08528	1.18752		0.802707	0.830375		1.43102	1.22182
1.57314	2.35863		0.907224	0.814899		1.26923	1.29086
2.0693	3.34599		0.859752	1.12867		1.47462	1.70952
1.87709	3.35138		0.929012	1.29383		1.46129	1.9177
2.17014	2.72217		0.926892	1.56335		1.6077	2.30713
2.04988	1.70012		0.928645	1.60779		1.60657	2.3313
2.17522	1.8074		0.879256	1.13988		1.84176	1.58268
1.58544	1.6606		0.795191	1.17979		1.5118	1.86257
1.62853	2.52204		0.878691	1.39187		1.6569	2.01625
1.72306	2.16564		0.865884	1.494		1.77023	2.11117
2.36627	3.30405		0.845081	1.33965		1.80033	1.91779
2.32482	2.80162		1.0021	1.57944		1.5727	2.45984
2.39292	3.17132		1.15019	1.48134		1.45832	2.2572
0.641017	2.04473		0.906253	1.77736		1.44656	2.63616
1.62992	2.85349		0.885096	1.64348		1.55265	2.44141
1.91098	2.70668		1.10384	1.45241		1.5223	2.39609
2.17396	3.56813		1.1934	1.54817		1.52901	2.39806
2.2685	3.21173		0.476737	0.516256		0.53327	0.627445
2.91171	4.35013		0.737805	0.786377		0.996734	0.991035
2.87025	3.84771		0.769344	0.78182		1.20306	0.960865
2.93835	4.21741		0.873861	0.766344		1.04127	1.0299
1.91605	1.48012		0.826389	1.08012		1.24666	1.44857
2.17903	2.49893		0.895649	1.24528		1.23333	1.65675
2.27357	2.14253		0.893529	1.5148		1.37974	2.04618
2.91678	3.28093		0.895282	1.55924		1.3786	2.07035
2.87532	2.77851		0.845893	1.09132		1.61379	1.32173
2.94343	3.14821		0.761828	1.13123		1.28384	1.60161
1.01766	1.71813		0.845328	1.34331		1.42893	1.7553
1.90389	3.21671		0.832521	1.44545		1.54227	1.85022
1.86244	2.71428		0.811718	1.2911		1.57237	1.65684
1.93054	3.08398		0.968736	1.53088		1.34474	2.19889
0.265084	0.423549		1.11683	1.43278		1.23036	1.99625
1.05925	1.15841		0.87289	1.7288		1.2186	2.37521
0.96477	1.08785		0.851733	1.59493		1.32469	2.18046
1.45263	2.25895		1.07048	1.40386		1.29433	2.13514
1.94879	3.24632		1.16004	1.49961		1.30104	2.13711
1.75658	3.25171		0.728173	0.764699		0.963244	0.91398
2.04963	2.6225		0.759712	0.760142		1.16957	0.88381
1.92936	1.60045		0.864229	0.744666		1.00778	0.952849
2.05471	1.70773		0.816757	1.05844		1.21317	1.37152
1.46493	1.56092		0.886017	1.2236		1.19984	1.5797
1.50802	2.42237		0.883897	1.49312		1.34625	1.96913
1.60255	2.06597		0.88565	1.53756		1.34511	1.99329
2.24576	3.20437		0.836261	1.06965		1.5803	1.24467
2.2043	2.70195		0.752196	1.10956		1.25035	1.52456
2.27241	3.07165		0.835696	1.32164		1.39544	1.67824
1.99843	2.86031		0.822889	1.42377		1.50878	1.77316
1.95697	2.35788		0.802086	1.26942		1.53888	1.57979
2.02508	2.72759		0.959104	1.5092		1.31125	2.12183
1.52371	2.68432		1.1072	1.4111		1.19687	1.91919
1.40344	2.67394		0.863258	1.70712		1.18511	2.29815
1.52878	3.4827		0.842101	1.57325		1.2912	2.1034
1.61792	3.33589		1.06085	1.38218		1.26084	2.05808
1.88091	4.19734		1.15041	1.47793		1.26755	2.06006
1.97544	3.84094		0.910033	0.889762		1.10006	0.932633
2.61866	4.97935		1.01455	0.874286		1.17171	1.14965
2.5772	4.47692		0.967078	1.18806		1.3771	1.56832
2.6453	4.84662		1.03634	1.35322		1.36377	1.7765
1.30919	2.08901		1.03422	1.62274		1.51018	2.16593
1.80536	3.07638		1.03597	1.66718		1.50904	2.19009
1.61314	3.08177		0.986582	1.19927		1.74423	1.44147
1.90619	2.45256		0.902517	1.23918		1.41428	1.72136
1.78593	1.43051		0.986017	1.45126		1.55937	1.87504
1.91127	1.53779		0.97321	1.55339		1.67271	1.96996
1.32149	1.39098		0.952407	1.39904		1.70281	1.77659
1.36458	2.25243		1.10943	1.63882		1.47518	2.31863
1.45911	1.89603		1.25752	1.54072		1.3608	2.11599
2.10233	3.03443		1.01358	1.83674		1.34904	2.49495
2.06087	2.53201		0.992422	1.70287		1.45513	2.30021
2.12897	2.90171		1.21117	1.5118		1.42477	2.25488
1.58926	2.35212		1.30073	1.60755		1.43148	2.25686
1.68379	1.99572		0.943906	0.852443		1.37804	1.11948
2.32701	3.13413		0.964046	1.16622		1.58343	1.53815
2.28555	2.6317		1.0333	1.33138		1.57009	1.74633
2.35365	3.0014		1.03119	1.60089		1.7165	2.13576
2.05809	2.88902		1.03294	1.64534		1.71537	2.15992
1.02725	1.23596		0.98355	1.17742		1.95056	1.4113
0.932771	1.16539		0.899485	1.21733		1.6206	1.69119
1.42063	2.3365		0.982985	1.42941		1.7657	1.84487
1.91679	3.32387		0.970178	1.53155		1.87903	1.9398
1.72458	3.32926		0.949374	1.3772		1.90913	1.74642
2.01763	2.70005		1.10639	1.61698		1.6815	2.28846
1.89737	1.678		1.25449	1.51888		1.56712	2.08583
2.02271	1.78528		1.01055	1.8149		1.55536	2.46478
1.43293	1.63847		0.98939	1.68103		1.66145	2.27004
1.47602	2.49992		1.20814	1.48996		1.6311	2.22471
1.57055	2.14352		1.2977	1.58571		1.63781	2.22669
2.21376	3.28192		1.06856	0.964779		1.17955	1.05219
2.17231	2.77949		1.13782	1.12994		1.16622	1.26037
2.24041	3.1492		1.1357	1.39946		1.31262	1.6498
0.206406	0.462653		1.13746	1.4439		1.31149	1.67396
0.352743	0.471929		1.08807	1.08148		1.68129	1.30732
0.320744	0.549477		1.004	1.12139		1.35134	1.58721
1.01564	1.20861		1.0875	1.33347		1.49643	1.7409
0.92116	1.13804		1.07469	1.43561		1.60977	1.83582
1.40901	2.30915		1.05389	1.28125		1.63987	1.64244
1.90518	3.29652		1.21091	1.52104		1.41224	2.18449
1.71297	3.30191		1.35901	1.42294		1.29786	1.98185
2.00602	2.6727		1.11506	1.71896		1.2861	2.36081
1.88576	1.65065		1.09391	1.58509		1.39219	2.16606
2.0111	1.75793		1.31265	1.39401		1.36183	2.12074
1.42132	1.61112		1.40221	1.48977		1.36854	2.12271
1.4644	2.47256		0.857131	1.17947		0.980926	1.28482
1.55894	2.11617		0.855011	1.44898		1.12733	1.67425
2.20215	3.25457		0.856764	1.49343		1.1262	1.69841
2.16069	2.75214		1.01928	1.39525		1.88668	1.72599
2.2288	3.12185		0.935218	1.43517		1.55673	2.00588
1.50965	1.83144		1.01872	1.64724		1.70182	2.15956
1.79071	1.68463		1.00591	1.74938		1.81516	2.25449
2.05369	2.54608		0.985108	1.59503		1.84526	2.06111
2.14823	2.18968		1.14213	1.83481		1.61763	2.60315
2.79144	3.32808		1.29022	1.73671		1.50324	2.40052
2.74998	2.82566		1.04628	2.03273		1.49149	2.77947
2.81809	3.19536		1.02512	1.89886		1.59758	2.58473
			1.24387	1.70779		1.56722	2.5394
			1.33343	1.80354		1.57393	2.54138
			0.890145	1.53031		0.967007	1.667
			0.891899	1.57475		0.965875	1.69116
			1.08854	1.56042		1.87335	1.93417
			1.00448	1.60032		1.54339	2.21406
			1.08798	1.81241		1.68849	2.36774
			1.07517	1.91454		1.80182	2.46267
			1.05437	1.76019		1.83192	2.26929
			1.21139	1.99997		1.60429	2.81133
			1.35948	1.90187		1.48991	2.6087
			1.11554	2.19789		1.47815	2.98766
			1.09438	2.06402		1.58424	2.79291
			1.31313	1.87295		1.55389	2.74758
			1.40269	1.9687		1.5606	2.74956
			0.446523	0.668934		0.476917	0.671154
			1.08642	1.82993		2.01976	2.3236
			1.00236	1.86984		1.6898	2.60349
			1.08586	2.08192		1.83489	2.75718
			1.07305	2.18406		1.94823	2.8521
			1.05225	2.02971		1.97833	2.65872
			1.20927	2.26949		1.7507	3.20076
			1.35736	2.17139		1.63632	2.99813
			1.11342	2.46741		1.62456	3.37709
			1.09226	2.33354		1.73065	3.18234
			1.31101	2.14247		1.7003	3.13702
			1.40057	2.23822		1.70701	3.13899
			1.08818	1.87437		2.01862	2.34777
			1.00411	1.91429		1.68867	2.62765
			1.08761	2.12636		1.83376	2.78134
			1.07481	2.2285		1.9471	2.87626
			1.054	2.07415		1.9772	2.68288
			1.21102	2.31393		1.74957	3.22493
			1.35912	2.21583		1.63519	3.02229
			1.11517	2.51185		1.62343	3.40125
			1.09402	2.37798		1.72952	3.2065
			1.31276	2.18691		1.69916	3.16118
			1.40232	2.28266		1.70588	3.16315
			0.664104	1.07636		0.946022	1.28271
			0.804104	1.28844		1.41714	1.43639
			0.791297	1.39057		1.85075	1.53131
			0.770494	1.23622		1.88085	1.33794
			1.0066	1.47601		1.65323	1.87998
			1.1547	1.3779		1.53885	1.67734
			0.910758	1.67392		1.52709	2.0563
			0.889601	1.54005		1.63318	1.86155
			1.10835	1.34898		1.60282	1.81623
			1.19791	1.44473		1.60953	1.81821
			0.720038	0.729561		1.08719	0.732172
			0.707232	0.903169		1.5208	0.992268
			0.686428	1.10962		1.5509	1.38818
			0.922539	1.41175		1.32327	1.93022
			1.07063	1.31365		1.20889	1.72758
			0.826692	1.60967		1.19713	2.10654
			0.805536	1.4758		1.30322	1.91179
			1.02428	1.28472		1.27287	1.86647
			1.11384	1.38048		1.27958	1.86845
			0.629088	1.11525		1.66589	1.14595
			0.608285	1.3217		1.69599	1.54186
			1.00604	1.62383		1.46836	2.0839
			1.15413	1.52573		1.35398	1.88127
			0.910192	1.82175		1.34223	2.26023
			0.889036	1.68788		1.44832	2.06548
			1.10778	1.4968		1.41796	2.02016
			1.19734	1.59256		1.42467	2.02213
			0.384834	1.42383		0.421088	1.63678
			0.993232	1.72596		1.19676	2.17882
			1.14133	1.62786		1.36894	1.97619
			0.897386	1.92388		1.35718	2.35515
			0.876229	1.79001		1.46327	2.1604
			1.09498	1.59894		1.43291	2.11508
			1.18453	1.69469		1.43963	2.11705
			0.972428	1.57161		1.22686	1.84997
			1.12052	1.47351		1.39904	1.64733
			0.876582	1.76953		1.38728	2.02629
			0.855426	1.63566		1.49337	1.83154
			1.07417	1.44459		1.46301	1.78622
			1.16373	1.54034		1.46973	1.78819
			1.14765	1.16822		1.17141	1.2093
			0.90371	1.81362		1.15965	2.0216
			0.982166	1.7567		1.26574	2.09279
			1.20091	1.56563		1.23539	2.04746
			1.29047	1.66138		1.2421	2.04944
			0.882064	1.71552		0.739477	1.81897
			1.13026	1.6586		1.00659	1.89015
			1.34901	1.46752		0.976233	1.84483
			1.43857	1.56328		0.982945	1.8468
			0.88632	1.95462		0.994829	2.26911
			1.10507	1.76355		0.964474	2.22379
			1.19463	1.8593		0.971186	2.22576
			1.01465	1.54898		0.729418	1.74043
			1.10421	1.64473		0.73613	1.7424
			0.414633	0.39525		0.407238	0.411343
