# Supplementary material for: Emergence of Dip2-mediated specific DAG-based PKC signalling axis in eukaryotes
Source: eLife journal article supplement (doi:10.7554/elife.104011), 2025-01-09
Supplement: fig5-data2 [file elife-104011-fig5-data2-v1.zip]

## Sheet: Sheet1
	n=30	Bayesian				ML -JTT model				NJ (MEGA)					ME
		DIP2	PKC			DIP2	PKC			DIP2	PKC				DIP2	PKC
	DIP2		0.842		DIP2		0.778953		DIP2		0.821892			DIP2		0.819192
	PKC	0.842			PKC	0.778953			PKC	0.821892				PKC	0.819192
	GAPDH	0.202	0.239		GAPDH	0.651558	0.621302		GAPDH	0.105	0.108863			GAPDH	0.117916	0.0592324
	PGK	0.391	0.431		PGK	0.588938	0.608573		PGK	0.630457	0.676214			PGK	0.694769	0.725168
	GAPDH-PGK	0.573			GAPDH-PGK	0.718847			GAPDH-PGK	0.0957674				GAPDH-PGK	0.108424
