# Supplementary material for: Emergence of Dip2-mediated specific DAG-based PKC signalling axis in eukaryotes
Source: eLife journal article supplement (doi:10.7554/elife.104011), 2025-01-09
Supplement: fig5-data3 [file elife-104011-fig5-data3-v1.zip]

## Sheet: Sheet1
Interspecies coevolution plot (using genetic distance)
DIP2	PKC		DIP2	GAPDH		PKC	GAPDH
1.81223	1.20443		1.81223	0.36862		1.20443	0.36862
1.73054	1.03291		1.73054	0.39231		1.03291	0.39231
1.81325	1.12681		1.81325	0.36253		1.12681	0.36253
1.71188	1.05153		1.71188	0.36831		1.05153	0.36831
1.77112	1.08122		1.77112	0.39298		1.08122	0.39298
1.89373	1.0916		1.89373	0.44564		1.0916	0.44564
1.70472	1.01532		1.70472	0.44127		1.01532	0.44127
1.79644	1.12992		1.79644	0.38522		1.12992	0.38522
1.97637	1.00729		1.97637	0.32251		1.00729	0.32251
1.79875	1.07168		1.79875	0.40433		1.07168	0.40433
2.35335	1.18497		2.35335	0.46778		1.18497	0.46778
1.71928	1.09212		1.71928	0.42636		1.09212	0.42636
1.7805	0.82427		1.7805	0.40869		0.82427	0.40869
1.78098	1.22047		1.78098	0.34751		1.22047	0.34751
1.68198	1.00093		1.68198	0.40796		1.00093	0.40796
1.70658	1.10826		1.70658	0.38817		1.10826	0.38817
1.75338	1.03503		1.75338	0.36289		1.03503	0.36289
1.73505	0.93958		1.73505	0.32674		0.93958	0.32674
2.08344	1.19049		2.08344	0.5583		1.19049	0.5583
1.85301	1.14591		1.85301	0.49228		1.14591	0.49228
1.76497	1.01472		1.76497	0.30804		1.01472	0.30804
1.69331	1.10893		1.69331	0.38215		1.10893	0.38215
1.84872	1.02953		1.84872	0.3801		1.02953	0.3801
1.98612	0.96575		1.98612	0.35479		0.96575	0.35479
1.89651	0.98104		1.89651	0.35502		0.98104	0.35502
2.45258	1.20748		2.45258	0.45384		1.20748	0.45384
1.75261	0.96621		1.75261	0.36288		0.96621	0.36288
1.68076	1.1451		1.68076	0.3612		1.1451	0.3612
1.71589	0.92455		1.71589	0.34515		0.92455	0.34515
1.69741	1.10514		1.69741	0.38089		1.10514	0.38089
1.76087	1.20944		1.76087	0.43839		1.20944	0.43839
1.79362	1.16146		1.79362	0.39202		1.16146	0.39202
0.41894	0.48699		0.41894	0.2018		0.48699	0.2018
1.55005	1.31237		1.55005	0.44284		1.31237	0.44284
0.05348	0.12964		0.05348	0.02868		0.12964	0.02868
0.38283	0.51371		0.38283	0.15789		0.51371	0.15789
1.08271	0.96624		1.08271	0.38603		0.96624	0.38603
0.39569	0.46218		0.39569	0.24877		0.46218	0.24877
1.45104	1.26504		1.45104	0.45961		1.26504	0.45961
1.65914	0.94843		1.65914	0.3811		0.94843	0.3811
0.08559	0.13302		0.08559	0.06998		0.13302	0.06998
1.56405	1.05829		1.56405	0.47091		1.05829	0.47091
0.39333	0.52196		0.39333	0.22832		0.52196	0.22832
0.45486	0.45984		0.45486	0.22981		0.45984	0.22981
1.52282	1.3916		1.52282	0.43725		1.3916	0.43725
0.58649	0.66143		0.58649	0.36805		0.66143	0.36805
0.4131	0.55457		0.4131	0.19503		0.55457	0.19503
0.44078	0.46797		0.44078	0.2408		0.46797	0.2408
1.15278	1.01972		1.15278	0.30344		1.01972	0.30344
1.23716	0.98691		1.23716	0.44645		0.98691	0.44645
0.82151	0.93834		0.82151	0.45542		0.93834	0.45542
1.26196	1.01683		1.26196	0.42284		1.01683	0.42284
0.42013	0.5428		0.42013	0.23285		0.5428	0.23285
1.09168	0.88524		1.09168	0.38434		0.88524	0.38434
1.4215	0.98024		1.4215	0.4113		0.98024	0.4113
1.50827	0.9638		1.50827	0.35897		0.9638	0.35897
1.57988	1.04355		1.57988	0.47171		1.04355	0.47171
0.58282	0.63237		0.58282	0.29789		0.63237	0.29789
0.85562	1.00798		0.85562	0.41657		1.00798	0.41657
1.48971	1.05551		1.48971	0.37612		1.05551	0.37612
0.41786	0.61973		0.41786	0.21024		0.61973	0.21024
0.42214	0.52		0.42214	0.25612		0.52	0.25612
0.75215	0.87663		0.75215	0.33676		0.87663	0.33676
1.57673	1.20432		1.57673	0.43476		1.20432	0.43476
0.47145	0.42934		0.47145	0.2019		0.42934	0.2019
0.3986	0.4358		0.3986	0.23938		0.4358	0.23938
1.11049	0.85851		1.11049	0.42058		0.85851	0.42058
0.34926	0.21901		0.34926	0.24169		0.21901	0.24169
1.40248	1.16786		1.40248	0.44626		1.16786	0.44626
1.57323	0.82161		1.57323	0.35523		0.82161	0.35523
0.5124	0.41843		0.5124	0.19577		0.41843	0.19577
1.52766	0.88218		1.52766	0.44662		0.88218	0.44662
0.43063	0.4619		0.43063	0.26357		0.4619	0.26357
0.38426	0.22347		0.38426	0.2217		0.22347	0.2217
1.46641	1.28544		1.46641	0.42154		1.28544	0.42154
0.56036	0.55738		0.56036	0.38094		0.55738	0.38094
0.47624	0.48595		0.47624	0.22626		0.48595	0.22626
0.2534	0.15133		0.2534	0.16615		0.15133	0.16615
1.11623	0.86584		1.11623	0.3076		0.86584	0.3076
1.22825	0.93593		1.22825	0.45212		0.93593	0.45212
0.80647	0.76236		0.80647	0.48583		0.76236	0.48583
1.34497	0.8711		1.34497	0.40832		0.8711	0.40832
0.44466	0.46436		0.44466	0.2581		0.46436	0.2581
1.13226	0.76936		1.13226	0.37738		0.76936	0.37738
1.36757	0.8531		1.36757	0.40737		0.8531	0.40737
1.46556	0.87243		1.46556	0.33694		0.87243	0.33694
1.57546	0.90246		1.57546	0.44722		0.90246	0.44722
0.55162	0.54447		0.55162	0.32895		0.54447	0.32895
0.79505	0.92934		0.79505	0.37619		0.92934	0.37619
1.41951	0.9306		1.41951	0.38575		0.9306	0.38575
0.46402	0.51349		0.46402	0.22485		0.51349	0.22485
0.44268	0.51392		0.44268	0.28721		0.51392	0.28721
0.74735	0.70217		0.74735	0.32726		0.70217	0.32726
1.56429	1.2325		1.56429	0.44542		1.2325	0.44542
1.57538	1.27892		1.57538	0.48358		1.27892	0.48358
1.73653	1.24253		1.73653	0.48425		1.24253	0.48425
1.54453	1.18105		1.54453	0.42605		1.18105	0.42605
1.68974	1.30767		1.68974	0.36042		1.30767	0.36042
1.71866	1.19804		1.71866	0.31304		1.19804	0.31304
1.57404	1.23017		1.57404	0.4445		1.23017	0.4445
1.97837	1.31864		1.97837	0.51075		1.31864	0.51075
1.58316	1.2099		1.58316	0.44006		1.2099	0.44006
1.57424	0.97942		1.57424	0.40675		0.97942	0.40675
1.58498	1.37656		1.58498	0.33636		1.37656	0.33636
1.54786	1.13453		1.54786	0.44502		1.13453	0.44502
1.57992	1.22487		1.57992	0.45501		1.22487	0.45501
1.59319	1.20985		1.59319	0.4137		1.20985	0.4137
1.50841	1.16954		1.50841	0.3324		1.16954	0.3324
1.85659	1.35351		1.85659	0.49465		1.35351	0.49465
1.69012	1.24763		1.69012	0.56347		1.24763	0.56347
1.48729	1.1603		1.48729	0.3565		1.1603	0.3565
1.54757	1.22842		1.54757	0.41262		1.22842	0.41262
1.44043	1.13207		1.44043	0.38847		1.13207	0.38847
1.62832	1.15466		1.62832	0.44547		1.15466	0.44547
1.71354	1.16953		1.71354	0.35829		1.16953	0.35829
2.03135	1.34068		2.03135	0.54919		1.34068	0.54919
1.52416	1.15304		1.52416	0.39813		1.15304	0.39813
1.66123	1.32452		1.66123	0.39706		1.32452	0.39706
1.16822	0.88206		1.16822	0.21429		0.88206	0.21429
1.55308	1.23556		1.55308	0.44044		1.23556	0.44044
1.57128	1.28763		1.57128	0.41271		1.28763	0.41271
1.53409	1.22465		1.53409	0.40904		1.22465	0.40904
0.41626	0.45258		0.41626	0.16853		0.45258	0.16853
1.0849	0.89298		1.0849	0.39811		0.89298	0.39811
0.52063	0.40998		0.52063	0.25597		0.40998	0.25597
1.41737	1.17209		1.41737	0.47069		1.17209	0.47069
1.61281	0.86612		1.61281	0.37352		0.86612	0.37352
0.15578	0.11575		0.15578	0.06109		0.11575	0.06109
1.53692	0.97524		1.53692	0.47039		0.97524	0.47039
0.44103	0.46488		0.44103	0.23602		0.46488	0.23602
0.52888	0.37786		0.52888	0.22713		0.37786	0.22713
1.4615	1.28388		1.4615	0.44068		1.28388	0.44068
0.56977	0.61422		0.56977	0.37318		0.61422	0.37318
0.47344	0.47609		0.47344	0.19567		0.47609	0.19567
0.47543	0.40847		0.47543	0.23261		0.40847	0.23261
1.15464	0.93936		1.15464	0.31404		0.93936	0.31404
1.22475	0.94069		1.22475	0.45114		0.94069	0.45114
0.79856	0.84032		0.79856	0.46701		0.84032	0.46701
1.32817	0.9444		1.32817	0.42677		0.9444	0.42677
0.43757	0.48149		0.43757	0.24821		0.48149	0.24821
1.06137	0.79648		1.06137	0.37435		0.79648	0.37435
1.33938	0.89986		1.33938	0.40701		0.89986	0.40701
1.46358	0.87576		1.46358	0.36055		0.87576	0.36055
1.5598	0.96187		1.5598	0.47088		0.96187	0.47088
0.55196	0.5707		0.55196	0.31659		0.5707	0.31659
0.79435	0.94467		0.79435	0.41277		0.94467	0.41277
1.40551	0.98455		1.40551	0.38148		0.98455	0.38148
0.47086	0.53896		0.47086	0.21436		0.53896	0.21436
0.45017	0.5368		0.45017	0.27262		0.5368	0.27262
0.74747	0.81033		0.74747	0.32654		0.81033	0.32654
1.09665	0.92911		1.09665	0.38676		0.92911	0.38676
0.39306	0.41278		0.39306	0.2689		0.41278	0.2689
1.40079	1.1361		1.40079	0.46673		1.1361	0.46673
1.61926	0.87355		1.61926	0.38266		0.87355	0.38266
0.453	0.46422		0.453	0.17452		0.46422	0.17452
1.53407	0.97057		1.53407	0.47268		0.97057	0.47268
0.30566	0.35119		0.30566	0.20819		0.35119	0.20819
0.45293	0.41578		0.45293	0.24984		0.41578	0.24984
1.5264	1.15963		1.5264	0.41097		1.15963	0.41097
0.57195	0.58763		0.57195	0.3875		0.58763	0.3875
0.33922	0.41932		0.33922	0.15973		0.41932	0.15973
0.44422	0.43307		0.44422	0.21658		0.43307	0.21658
1.12493	0.89477		1.12493	0.3071		0.89477	0.3071
1.28663	0.96465		1.28663	0.46031		0.96465	0.46031
0.78504	0.85416		0.78504	0.46338		0.85416	0.46338
1.3455	0.93923		1.3455	0.43128		0.93923	0.43128
0.31611	0.39085		0.31611	0.19828		0.39085	0.19828
1.16472	0.80148		1.16472	0.42131		0.80148	0.42131
1.37627	0.87752		1.37627	0.43272		0.87752	0.43272
1.51308	0.92572		1.51308	0.37064		0.92572	0.37064
1.55652	1.01656		1.55652	0.47759		1.01656	0.47759
0.55693	0.55499		0.55693	0.33184		0.55499	0.33184
0.8175	0.98338		0.8175	0.39096		0.98338	0.39096
1.46082	1.0438		1.46082	0.43112		1.0438	0.43112
0.37476	0.43789		0.37476	0.20287		0.43789	0.20287
0.32671	0.40205		0.32671	0.21203		0.40205	0.21203
0.74688	0.80998		0.74688	0.34512		0.80998	0.34512
1.06959	0.84395		1.06959	0.41496		0.84395	0.41496
1.67113	1.25033		1.67113	0.49361		1.25033	0.49361
1.85396	0.98038		1.85396	0.39176		0.98038	0.39176
1.12553	0.89117		1.12553	0.38994		0.89117	0.38994
1.48407	0.82913		1.48407	0.27012		0.82913	0.27012
1.11326	0.9136		1.11326	0.34319		0.9136	0.34319
1.12515	0.76791		1.12515	0.40048		0.76791	0.40048
1.75099	1.37035		1.75099	0.4351		1.37035	0.4351
1.10864	0.84458		1.10864	0.35392		0.84458	0.35392
1.07794	0.92514		1.07794	0.4169		0.92514	0.4169
1.11723	0.85211		1.11723	0.39524		0.85211	0.39524
1.40799	0.98615		1.40799	0.31091		0.98615	0.31091
1.1658	0.87997		1.1658	0.20849		0.87997	0.20849
1.21703	0.98624		1.21703	0.4396		0.98624	0.4396
1.55007	1.0104		1.55007	0.37128		1.0104	0.37128
1.08688	0.93667		1.08688	0.38978		0.93667	0.38978
1.33722	1.01657		1.33722	0.37958		1.01657	0.37958
1.58651	0.96454		1.58651	0.38363		0.96454	0.38363
1.63618	1.03732		1.63618	0.32339		1.03732	0.32339
1.48569	0.83696		1.48569	0.27312		0.83696	0.27312
1.08179	0.8386		1.08179	0.33453		0.8386	0.33453
1.1209	1.08262		1.1209	0.34016		1.08262	0.34016
1.72594	0.95327		1.72594	0.41288		0.95327	0.41288
1.08314	0.92979		1.08314	0.36528		0.92979	0.36528
1.11674	0.95784		1.11674	0.36528		0.95784	0.36528
0.9629	0.97802		0.9629	0.27348		0.97802	0.27348
1.35832	1.13611		1.35832	0.47161		1.13611	0.47161
1.62123	0.82776		1.62123	0.3714		0.82776	0.3714
0.49611	0.39163		0.49611	0.24563		0.39163	0.24563
1.46698	0.87104		1.46698	0.47643		0.87104	0.47643
0.44952	0.44843		0.44952	0.27166		0.44843	0.27166
0.3436	0.20447		0.3436	0.16096		0.20447	0.16096
1.44051	1.22872		1.44051	0.43226		1.22872	0.43226
0.56164	0.55089		0.56164	0.42159		0.55089	0.42159
0.48951	0.46571		0.48951	0.26334		0.46571	0.26334
0.3666	0.23009		0.3666	0.24949		0.23009	0.24949
1.13202	0.88568		1.13202	0.37732		0.88568	0.37732
1.22475	0.91196		1.22475	0.47333		0.91196	0.47333
0.78016	0.75131		0.78016	0.47454		0.75131	0.47454
1.27259	0.85978		1.27259	0.40917		0.85978	0.40917
0.44508	0.4464		0.44508	0.25644		0.4464	0.25644
1.04707	0.76688		1.04707	0.39761		0.76688	0.39761
1.29486	0.86249		1.29486	0.47821		0.86249	0.47821
1.43802	0.8773		1.43802	0.40328		0.8773	0.40328
1.52211	0.86935		1.52211	0.489		0.86935	0.489
0.54016	0.54273		0.54016	0.31301		0.54273	0.31301
0.75175	0.92783		0.75175	0.40935		0.92783	0.40935
1.35217	0.94613		1.35217	0.42585		0.94613	0.42585
0.45696	0.50116		0.45696	0.26337		0.50116	0.26337
0.46445	0.50149		0.46445	0.28764		0.50149	0.28764
0.75525	0.73153		0.75525	0.3322		0.73153	0.3322
1.53143	1.04848		1.53143	0.35924		1.04848	0.35924
1.43524	1.18757		1.43524	0.46945		1.18757	0.46945
1.98678	1.37702		1.98678	0.4884		1.37702	0.4884
1.38458	1.21126		1.38458	0.45117		1.21126	0.45117
1.39401	1.03924		1.39401	0.46214		1.03924	0.46214
0.39525	0.41463		0.39525	0.24518		0.41463	0.24518
1.43845	1.09598		1.43845	0.45736		1.09598	0.45736
1.40447	1.20088		1.40447	0.49497		1.20088	0.49497
1.42127	1.1793		1.42127	0.45057		1.1793	0.45057
1.40189	1.00025		1.40189	0.3268		1.00025	0.3268
1.79501	1.33543		1.79501	0.53233		1.33543	0.53233
1.48941	1.23265		1.48941	0.52694		1.23265	0.52694
1.47348	1.04591		1.47348	0.37809		1.04591	0.37809
1.39856	1.25237		1.39856	0.44554		1.25237	0.44554
1.38952	1.00409		1.38952	0.41823		1.00409	0.41823
1.38076	0.99254		1.38076	0.48142		0.99254	0.48142
1.52562	1.0767		1.52562	0.38224		1.0767	0.38224
2.04791	1.42035		2.04791	0.58793		1.42035	0.58793
1.39255	1.11206		1.39255	0.41063		1.11206	0.41063
1.44556	1.29061		1.44556	0.39261		1.29061	0.39261
1.49571	1.10458		1.49571	0.34043		1.10458	0.34043
1.40185	1.17077		1.40185	0.45705		1.17077	0.45705
1.39586	1.28341		1.39586	0.44711		1.28341	0.44711
1.55018	1.1903		1.55018	0.38519		1.1903	0.38519
1.66931	0.84504		1.66931	0.37767		0.84504	0.37767
2.01858	1.05083		2.01858	0.42805		1.05083	0.42805
1.56354	0.85841		1.56354	0.31759		0.85841	0.31759
1.63015	0.6713		1.63015	0.34014		0.6713	0.34014
1.66227	1.07038		1.66227	0.3189		1.07038	0.3189
1.6214	0.85346		1.6214	0.36435		0.85346	0.36435
1.59489	0.85288		1.59489	0.33301		0.85288	0.33301
1.61235	0.84142		1.61235	0.31617		0.84142	0.31617
1.52163	0.90085		1.52163	0.28275		0.90085	0.28275
1.902	1.03779		1.902	0.50325		1.03779	0.50325
1.70452	0.96665		1.70452	0.4061		0.96665	0.4061
1.59888	0.87642		1.59888	0.2794		0.87642	0.2794
1.60968	0.8522		1.60968	0.34159		0.8522	0.34159
1.59403	0.84008		1.59403	0.35043		0.84008	0.35043
1.75356	0.88581		1.75356	0.39922		0.88581	0.39922
1.78832	0.94705		1.78832	0.29978		0.94705	0.29978
2.10405	1.04015		2.10405	0.46382		1.04015	0.46382
1.68293	0.87788		1.68293	0.31828		0.87788	0.31828
1.70984	1.14851		1.70984	0.31396		1.14851	0.31396
1.63585	0.95629		1.63585	0.29456		0.95629	0.29456
1.58186	0.8525		1.58186	0.32397		0.8525	0.32397
1.62102	0.92395		1.62102	0.32904		0.92395	0.32904
1.65983	0.94591		1.65983	0.30916		0.94591	0.30916
1.58484	0.98615		1.58484	0.44941		0.98615	0.44941
0.48804	0.46694		0.48804	0.23978		0.46694	0.23978
0.57015	0.35943		0.57015	0.24529		0.35943	0.24529
1.53957	1.248		1.53957	0.44953		1.248	0.44953
0.61785	0.59738		0.61785	0.37191		0.59738	0.37191
0.51306	0.48202		0.51306	0.19647		0.48202	0.19647
0.51558	0.40041		0.51558	0.24831		0.40041	0.24831
1.15448	0.93821		1.15448	0.30848		0.93821	0.30848
1.26071	0.9327		1.26071	0.44693		0.9327	0.44693
0.84046	0.85627		0.84046	0.4614		0.85627	0.4614
1.39932	0.92264		1.39932	0.4353		0.92264	0.4353
0.49654	0.48216		0.49654	0.24029		0.48216	0.24029
1.15266	0.78529		1.15266	0.38387		0.78529	0.38387
1.42967	0.91202		1.42967	0.43648		0.91202	0.43648
1.52565	0.90902		1.52565	0.37095		0.90902	0.37095
1.58652	0.93734		1.58652	0.4603		0.93734	0.4603
0.60615	0.57604		0.60615	0.32675		0.57604	0.32675
0.86757	0.94045		0.86757	0.41113		0.94045	0.41113
1.48204	0.98719		1.48204	0.40034		0.98719	0.40034
0.52248	0.53899		0.52248	0.21684		0.53899	0.21684
0.52171	0.55019		0.52171	0.27403		0.55019	0.27403
0.77756	0.83032		0.77756	0.31871		0.83032	0.31871
1.52488	0.97081		1.52488	0.4151		0.97081	0.4151
1.50354	0.95223		1.50354	0.44404		0.95223	0.44404
2.05764	1.53588		2.05764	0.48729		1.53588	0.48729
1.60277	0.90907		1.60277	0.40178		0.90907	0.40178
1.48646	0.9475		1.48646	0.48317		0.9475	0.48317
1.50959	0.89508		1.50959	0.41841		0.89508	0.41841
1.73192	1.08648		1.73192	0.41162		1.08648	0.41162
1.55253	0.89485		1.55253	0.28301		0.89485	0.28301
1.61038	0.94057		1.61038	0.48087		0.94057	0.48087
1.85796	1.15271		1.85796	0.43414		1.15271	0.43414
1.5064	0.97354		1.5064	0.45068		0.97354	0.45068
1.82659	1.01888		1.82659	0.44196		1.01888	0.44196
1.9158	1.09086		1.9158	0.43025		1.09086	0.43025
1.93705	1.06867		1.93705	0.38977		1.06867	0.38977
0.66893	0.44652		0.66893	0.23467		0.44652	0.23467
1.56222	0.87497		1.56222	0.39369		0.87497	0.39369
1.67747	1.08775		1.67747	0.38817		1.08775	0.38817
1.89588	1.10595		1.89588	0.47225		1.10595	0.47225
1.554	1.01299		1.554	0.41734		1.01299	0.41734
1.50092	1.04496		1.50092	0.45823		1.04496	0.45823
1.45191	1.06823		1.45191	0.37401		1.06823	0.37401
0.50118	0.43629		0.50118	0.25826		0.43629	0.25826
1.51195	1.26323		1.51195	0.40995		1.26323	0.40995
0.58723	0.60028		0.58723	0.40681		0.60028	0.40681
0.30588	0.3017		0.30588	0.19137		0.3017	0.19137
0.47412	0.45977		0.47412	0.28434		0.45977	0.28434
1.12334	0.89896		1.12334	0.29597		0.89896	0.29597
1.26324	0.98175		1.26324	0.45004		0.98175	0.45004
0.78657	0.82282		0.78657	0.42893		0.82282	0.42893
1.35729	0.94311		1.35729	0.41599		0.94311	0.41599
0.28251	0.29968		0.28251	0.17406		0.29968	0.17406
1.10726	0.84449		1.10726	0.38594		0.84449	0.38594
1.37212	0.88354		1.37212	0.42875		0.88354	0.42875
1.47075	0.96942		1.47075	0.35921		0.96942	0.35921
1.56354	0.9468		1.56354	0.43297		0.9468	0.43297
0.53564	0.56313		0.53564	0.27853		0.56313	0.27853
0.80402	0.9591		0.80402	0.36944		0.9591	0.36944
1.4228	1.01104		1.4228	0.39929		1.01104	0.39929
0.32538	0.36078		0.32538	0.16645		0.36078	0.16645
0.24356	0.2423		0.24356	0.09881		0.2423	0.09881
0.75984	0.78139		0.75984	0.34036		0.78139	0.34036
1.52203	1.11327		1.52203	0.43656		1.11327	0.43656
0.58919	0.56847		0.58919	0.41448		0.56847	0.41448
0.53966	0.43036		0.53966	0.22668		0.43036	0.22668
0.42271	0.23488		0.42271	0.19919		0.23488	0.19919
1.10822	0.69778		1.10822	0.31548		0.69778	0.31548
1.27341	0.89212		1.27341	0.38508		0.89212	0.38508
0.8026	0.71816		0.8026	0.44782		0.71816	0.44782
1.37549	0.73857		1.37549	0.40747		0.73857	0.40747
0.4839	0.44697		0.4839	0.2322		0.44697	0.2322
1.16586	0.606		1.16586	0.4113		0.606	0.4113
1.39814	0.72759		1.39814	0.45801		0.72759	0.45801
1.49699	0.69721		1.49699	0.3901		0.69721	0.3901
1.52967	0.88545		1.52967	0.44751		0.88545	0.44751
0.59239	0.48101		0.59239	0.32184		0.48101	0.32184
0.8164	0.74007		0.8164	0.38109		0.74007	0.38109
1.49614	0.6761		1.49614	0.34793		0.6761	0.34793
0.54902	0.42464		0.54902	0.21558		0.42464	0.21558
0.52115	0.50967		0.52115	0.27075		0.50967	0.27075
0.7521	0.7109		0.7521	0.33978		0.7109	0.33978
1.51658	1.20773		1.51658	0.37549		1.20773	0.37549
1.53235	1.27263		1.53235	0.44321		1.27263	0.44321
1.51017	1.25464		1.51017	0.35908		1.25464	0.35908
1.43058	1.14929		1.43058	0.28339		1.14929	0.28339
1.8653	1.4652		1.8653	0.4977		1.4652	0.4977
1.59398	1.34891		1.59398	0.47999		1.34891	0.47999
1.56138	1.11456		1.56138	0.33805		1.11456	0.33805
1.54126	1.27015		1.54126	0.38788		1.27015	0.38788
1.55191	1.02775		1.55191	0.38765		1.02775	0.38765
1.63608	1.06488		1.63608	0.42941		1.06488	0.42941
1.67258	1.16789		1.67258	0.35303		1.16789	0.35303
2.10709	1.53182		2.10709	0.5299		1.53182	0.5299
1.51061	1.20089		1.51061	0.33141		1.20089	0.33141
1.60008	1.41145		1.60008	0.39718		1.41145	0.39718
1.61279	1.20442		1.61279	0.31116		1.20442	0.31116
1.50392	1.23949		1.50392	0.4014		1.23949	0.4014
1.53726	1.40988		1.53726	0.38183		1.40988	0.38183
1.5931	1.30418		1.5931	0.34538		1.30418	0.34538
0.56288	0.60989		0.56288	0.40451		0.60989	0.40451
0.57652	0.58632		0.57652	0.39512		0.58632	0.39512
1.08048	0.86542		1.08048	0.29173		0.86542	0.29173
1.30696	0.93145		1.30696	0.40853		0.93145	0.40853
0.79513	0.66445		0.79513	0.44996		0.66445	0.44996
1.22117	0.86241		1.22117	0.27627		0.86241	0.27627
0.58082	0.60858		0.58082	0.37317		0.60858	0.37317
1.03614	0.70981		1.03614	0.3487		0.70981	0.3487
1.30456	0.86038		1.30456	0.37839		0.86038	0.37839
1.42639	0.8405		1.42639	0.32874		0.8405	0.32874
1.61978	0.86072		1.61978	0.41772		0.86072	0.41772
0.51626	0.47674		0.51626	0.2878		0.47674	0.2878
0.7843	0.91606		0.7843	0.33511		0.91606	0.33511
1.42215	0.90028		1.42215	0.37313		0.90028	0.37313
0.58054	0.64246		0.58054	0.38717		0.64246	0.38717
0.58488	0.69153		0.58488	0.42859		0.69153	0.42859
0.77809	0.73369		0.77809	0.34022		0.73369	0.34022
0.49349	0.49221		0.49349	0.22325		0.49221	0.22325
1.13219	0.89171		1.13219	0.31682		0.89171	0.31682
1.27055	0.97508		1.27055	0.48083		0.97508	0.48083
0.80858	0.86055		0.80858	0.41685		0.86055	0.41685
1.36469	0.91137		1.36469	0.41735		0.91137	0.41735
0.29986	0.30173		0.29986	0.16183		0.30173	0.16183
1.09685	0.85969		1.09685	0.40714		0.85969	0.40714
1.34358	0.90405		1.34358	0.44412		0.90405	0.44412
1.48275	0.9258		1.48275	0.3764		0.9258	0.3764
1.55255	0.94513		1.55255	0.50178		0.94513	0.50178
0.53685	0.56893		0.53685	0.29818		0.56893	0.29818
0.77892	0.95934		0.77892	0.4026		0.95934	0.4026
1.43946	0.95491		1.43946	0.40427		0.95491	0.40427
0.34853	0.37983		0.34853	0.18765		0.37983	0.18765
0.3073	0.35499		0.3073	0.18552		0.35499	0.18552
0.7781	0.82334		0.7781	0.38093		0.82334	0.38093
1.11468	0.87392		1.11468	0.32995		0.87392	0.32995
1.24963	0.93067		1.24963	0.45293		0.93067	0.45293
0.81143	0.78798		0.81143	0.44584		0.78798	0.44584
1.31182	0.85117		1.31182	0.38332		0.85117	0.38332
0.47007	0.46346		0.47007	0.25574		0.46346	0.25574
1.1324	0.76418		1.1324	0.35708		0.76418	0.35708
1.36499	0.84278		1.36499	0.42096		0.84278	0.42096
1.50173	0.88336		1.50173	0.30054		0.88336	0.30054
1.57042	0.9147		1.57042	0.44985		0.9147	0.44985
0.56191	0.56061		0.56191	0.31704		0.56061	0.31704
0.79402	0.94773		0.79402	0.38535		0.94773	0.38535
1.44291	0.91912		1.44291	0.36588		0.91912	0.36588
0.48868	0.51154		0.48868	0.22984		0.51154	0.22984
0.48649	0.50995		0.48649	0.32858		0.50995	0.32858
0.75751	0.72906		0.75751	0.32563		0.72906	0.32563
1.52382	1.11065		1.52382	0.30446		1.11065	0.30446
1.25759	0.98216		1.25759	0.40394		0.98216	0.40394
1.14215	0.78953		1.14215	0.2834		0.78953	0.2834
1.11004	0.87409		1.11004	0.278		0.87409	0.278
1.02436	0.70507		1.02436	0.32285		0.70507	0.32285
0.72956	0.38483		0.72956	0.36744		0.38483	0.36744
0.90497	0.61928		0.90497	0.21644		0.61928	0.21644
1.80087	1.14991		1.80087	0.39776		1.14991	0.39776
1.0891	0.8026		1.0891	0.29262		0.8026	0.29262
1.21872	1.14864		1.21872	0.28537		1.14864	0.28537
1.30432	0.88038		1.30432	0.29683		0.88038	0.29683
1.10317	0.86964		1.10317	0.25451		0.86964	0.25451
1.12732	0.97363		1.12732	0.3041		0.97363	0.3041
1.2494	0.98484		1.2494	0.28835		0.98484	0.28835
1.34243	1.03793		1.34243	0.55506		1.03793	0.55506
1.67097	1.10052		1.67097	0.4013		1.10052	0.4013
1.27807	0.96515		1.27807	0.50498		0.96515	0.50498
1.56439	0.99863		1.56439	0.41751		0.99863	0.41751
1.57253	1.04033		1.57253	0.47042		1.04033	0.47042
1.71349	1.10508		1.71349	0.36085		1.10508	0.36085
1.55253	0.8872		1.55253	0.33089		0.8872	0.33089
1.29584	0.91095		1.29584	0.4348		0.91095	0.4348
1.3345	1.11609		1.3345	0.40734		1.11609	0.40734
1.84077	1.0936		1.84077	0.4809		1.0936	0.4809
1.28103	0.97149		1.28103	0.42982		0.97149	0.42982
1.27724	0.99588		1.27724	0.47035		0.99588	0.47035
1.10833	1.01445		1.10833	0.33512		1.01445	0.33512
1.36384	1.00495		1.36384	0.41086		1.00495	0.41086
0.82561	0.84461		0.82561	0.42432		0.84461	0.42432
1.13058	0.85824		1.13058	0.47344		0.85824	0.47344
1.41443	0.96301		1.41443	0.44846		0.96301	0.44846
1.49467	0.9633		1.49467	0.44102		0.9633	0.44102
1.67335	1.0057		1.67335	0.50744		1.0057	0.50744
0.77168	0.70605		0.77168	0.37828		0.70605	0.37828
0.88127	0.94391		0.88127	0.45341		0.94391	0.45341
1.55217	1.01749		1.55217	0.48677		1.01749	0.48677
0.80554	0.84859		0.80554	0.42482		0.84859	0.42482
0.79272	0.92043		0.79272	0.44771		0.92043	0.44771
0.9793	0.94899		0.9793	0.42214		0.94899	0.42214
1.32009	0.93387		1.32009	0.40911		0.93387	0.40911
1.11055	0.6641		1.11055	0.31724		0.6641	0.31724
1.28876	0.73308		1.28876	0.35459		0.73308	0.35459
1.42403	0.82322		1.42403	0.27426		0.82322	0.27426
1.886	1.17334		1.886	0.42228		1.17334	0.42228
1.19264	0.78454		1.19264	0.2603		0.78454	0.2603
1.32547	1.14576		1.32547	0.28737		1.14576	0.28737
1.41436	0.90433		1.41436	0.30156		0.90433	0.30156
1.34268	0.94368		1.34268	0.41018		0.94368	0.41018
1.3795	1.00424		1.3795	0.41826		1.00424	0.41826
1.36689	0.96836		1.36689	0.31565		0.96836	0.31565
1.12782	0.87487		1.12782	0.38752		0.87487	0.38752
1.34682	0.86383		1.34682	0.4066		0.86383	0.4066
1.53239	0.92622		1.53239	0.37338		0.92622	0.37338
1.57535	0.97226		1.57535	0.48235		0.97226	0.48235
0.55863	0.6047		0.55863	0.2747		0.6047	0.2747
0.81724	0.98961		0.81724	0.35999		0.98961	0.35999
1.45193	1.0236		1.45193	0.36366		1.0236	0.36366
0.30875	0.3495		0.30875	0.17898		0.3495	0.17898
0.30229	0.33414		0.30229	0.18165		0.33414	0.18165
0.76029	0.81405		0.76029	0.35034		0.81405	0.35034
1.27888	0.67421		1.27888	0.41989		0.67421	0.41989
1.36683	0.72771		1.36683	0.3273		0.72771	0.3273
1.83671	1.01666		1.83671	0.49557		1.01666	0.49557
1.0179	0.71402		1.0179	0.34779		0.71402	0.34779
1.14335	1.03098		1.14335	0.37024		1.03098	0.37024
1.41993	0.8516		1.41993	0.3753		0.8516	0.3753
1.13169	0.85474		1.13169	0.37671		0.85474	0.37671
1.15749	0.94249		1.15749	0.42323		0.94249	0.42323
1.14597	0.87429		1.14597	0.30559		0.87429	0.30559
1.11344	0.61809		1.11344	0.2991		0.61809	0.2991
1.93412	1.11246		1.93412	0.40099		1.11246	0.40099
1.3472	0.80301		1.3472	0.37399		0.80301	0.37399
1.42509	1.0572		1.42509	0.36168		1.0572	0.36168
1.54357	0.84066		1.54357	0.34093		0.84066	0.34093
1.40076	0.85764		1.40076	0.42941		0.85764	0.42941
1.3901	0.98236		1.3901	0.46606		0.98236	0.46606
1.40037	0.95955		1.40037	0.38112		0.95955	0.38112
1.9801	1.10047		1.9801	0.42796		1.10047	0.42796
1.45271	0.81298		1.45271	0.31059		0.81298	0.31059
1.58403	1.11408		1.58403	0.27133		1.11408	0.27133
1.64284	0.93872		1.64284	0.32375		0.93872	0.32375
1.52805	0.90537		1.52805	0.35724		0.90537	0.35724
1.52817	1.02705		1.52817	0.37356		1.02705	0.37356
1.50491	0.95017		1.50491	0.26714		0.95017	0.26714
1.65107	0.89265		1.65107	0.38625		0.89265	0.38625
1.72418	1.05095		1.72418	0.39135		1.05095	0.39135
2.04347	1.09424		2.04347	0.49701		1.09424	0.49701
1.55515	1.00201		1.55515	0.44838		1.00201	0.44838
1.57926	1.04104		1.57926	0.46848		1.04104	0.46848
1.44218	1.04801		1.44218	0.37609		1.04801	0.37609
0.72093	0.91341		0.72093	0.3156		0.91341	0.3156
1.4543	0.9306		1.4543	0.35686		0.9306	0.35686
0.57532	0.58906		0.57532	0.29697		0.58906	0.29697
0.55094	0.6351		0.55094	0.3083		0.6351	0.3083
0.77404	0.73275		0.77404	0.29374		0.73275	0.29374
1.53292	1.1122		1.53292	0.36499		1.1122	0.36499
0.80074	0.98657		0.80074	0.37645		0.98657	0.37645
0.82672	1.04658		0.82672	0.38532		1.04658	0.38532
0.90692	0.99453		0.90692	0.32795		0.99453	0.32795
1.45979	1.00046		1.45979	0.37656		1.00046	0.37656
1.5061	1.08737		1.5061	0.38098		1.08737	0.38098
1.48736	0.95504		1.48736	0.35156		0.95504	0.35156
0.35604	0.40113		0.35604	0.19368		0.40113	0.19368
0.75512	0.81089		0.75512	0.32106		0.81089	0.32106
0.77242	0.84797		0.77242	0.34965		0.84797	0.34965
