# Supplementary material for: Emergence of Dip2-mediated specific DAG-based PKC signalling axis in eukaryotes
Source: eLife journal article supplement (doi:10.7554/elife.104011), 2025-01-09
Supplement: fig5-figsupp2-data1 [file elife-104011-fig5-figsupp2-data1-v1.zip]

## Sheet: Sheet1
Dip2	PKC1	GAPDH
0.531888	0.484184	0.198091
0.535076	0.483308	0.215155
0.531119	0.472987	0.224394
0.482783	0.469369	0.245628
0.533024	0.472352	0.196099
0.511841	0.487825	0.210441
0.509239	0.456023	0.196187
0.509492	0.488442	0.210812
0.524738	0.474664	0.241717
0.52829	0.476954	0.204813
0.401628	0.489644	0.184293
0.556731	0.475411	0.223522
0.498218	0.515834	0.15789
1.21307	0.994572	0.481482
1.17896	0.970237	0.472127
1.12212	0.96033	0.381745
1.2152	0.927928	0.424094
1.13043	0.97957	0.407601
1.73879	1.0216	0.467447
1.10045	0.990993	0.418545
1.12929	1.0001	0.440377
1.15687	0.93055	0.457824
0.57442	0.442619	0.248766
0.574658	0.452209	0.247171
0.48596	0.531381	0.218124
0.499394	0.522171	0.214093
0.506508	0.548251	0.21312
1.12137	0.902671	0.397326
0.48957	0.498681	0.169063
1.57807	1.02045	0.470905
1.53942	1.0232	0.453914
0.451883	0.496641	0.15218
0.412423	0.465765	0.177636
0.49243	0.519892	0.239512
0.484954	0.527212	0.231758
0.494479	0.519892	0.239512
0.45051	0.507908	0.216423
0.484654	0.519612	0.238587
0.474634	0.505711	0.152728
0.576104	0.49655	0.237986
1.67203	1.02363	0.487745
1.67397	1.07751	0.495484
1.53646	0.994356	0.479868
1.57551	0.977666	0.518576
1.0235	0.856082	0.421054
1.61876	1.00878	0.48821
0.493314	0.515953	0.233582
0.500789	0.519606	0.234209
1.63912	0.998464	0.459975
1.60457	1.02881	0.487512
0.53284	0.541432	0.195026
0.535383	0.543463	0.195026
1.14553	0.898946	0.418817
0.517704	0.582511	0.206377
0.515725	0.505865	0.207745
0.178008	0.221227	0.073569
0.546759	0.494424	0.22565
0.533304	0.486814	0.232574
0.481555	0.51219	0.199575
0.489045	0.492781	0.202184
1.28129	1.00186	0.429525
0.489412	0.536764	0.218889
0.090255	0.096066	0.014351
0.482387	0.568505	0.235667
1.61853	1.02607	0.471715
1.64924	1.01647	0.468149
1.62692	1.0163	0.473986
1.62121	1.02622	0.475317
1.63731	1.00207	0.495007
1.14205	0.87656	0.469068
0.842292	0.749743	0.416568
0.540126	0.537141	0.20971
1.11248	0.915735	0.395801
0.51077	0.611839	0.217192
0.76206	0.669981	0.353742
0.514427	0.477764	0.218679
1.64667	0.983448	0.462193
1.66344	1.02755	0.462157
0.53553	0.550836	0.21043
0.508205	0.558631	0.216495
0.497035	0.55671	0.219497
1.68458	1.02137	0.477274
0.441995	0.52598	0.261804
0.556299	0.473104	0.257183
0.55546	0.473104	0.324594
0.539277	0.383713	0.335948
0.56749	0.436008	0.305315
1.6466	1.03075	0.451982
0.499171	0.569109	0.185351
0.480788	0.539294	0.186339
0.780055	0.785436	0.341834
1.61255	1.07765	0.488598
1.61886	1.05177	0.481311
0.234428	0.138162	0.167858
0.228096	0.123005	0.172005
0.184892	0.124093	0.150931
0.231769	0.125946	0.140795
0.208497	0.136	0.103399
0.228332	0.147699	0.165711
0.20745	0.139138	0.109977
0.204601	0.127331	0.147482
0.248333	0.160645	0.161928
0.500743	0.45937	0.240603
0.419119	0.224321	0.233483
0.434805	0.445215	0.215957
1.16624	0.893734	0.493059
1.1559	0.861841	0.512088
1.10529	0.846145	0.413171
1.15339	0.844251	0.437649
1.11486	0.861731	0.422135
1.74964	0.904625	0.485083
1.10827	0.878083	0.444074
1.10048	0.898268	0.449265
1.11365	0.831861	0.439085
0.415772	0.215604	0.244658
0.416224	0.218742	0.241243
0.440721	0.456936	0.281195
0.449039	0.455672	0.284128
0.465054	0.480016	0.273519
1.10828	0.831386	0.387849
0.447487	0.436094	0.219097
1.53463	0.916682	0.450801
1.51125	0.890435	0.461769
0.424899	0.449982	0.242285
0.52215	0.438062	0.209084
0.451243	0.48663	0.287482
0.449788	0.477043	0.287079
0.451668	0.48663	0.287482
0.413077	0.461517	0.260985
0.452399	0.46964	0.286409
0.4164	0.44961	0.236068
0.433201	0.232827	0.236669
1.64212	0.914817	0.469037
1.66186	0.931579	0.501175
1.53262	0.872152	0.4812
1.58081	0.861664	0.488059
1.04123	0.782537	0.440174
1.57684	0.909783	0.44544
0.476109	0.443861	0.264656
0.472972	0.439983	0.260468
1.65214	0.891195	0.468763
1.58463	0.940715	0.492557
0.519393	0.488443	0.217131
0.519302	0.488559	0.217131
1.15493	0.773466	0.438453
0.392639	0.300484	0.25824
0.390075	0.245178	0.258514
0.519568	0.433429	0.212542
0.300489	0.168329	0.157638
0.269391	0.156705	0.146481
0.43802	0.458287	0.264434
0.42637	0.435278	0.254173
1.25608	0.912543	0.438366
0.451003	0.46692	0.257263
0.529026	0.424507	0.202199
0.449837	0.457987	0.235023
1.60652	0.901972	0.458496
1.56987	0.905089	0.468104
1.6354	0.911441	0.457255
1.61094	0.905695	0.456703
1.5901	0.942574	0.469156
1.10066	0.786424	0.453129
0.793689	0.650215	0.411801
0.519553	0.485041	0.230674
1.10385	0.84424	0.39233
0.476593	0.496064	0.230362
0.712501	0.61366	0.383551
0.327031	0.266342	0.216888
1.63185	0.915023	0.461881
1.6789	0.927075	0.475578
0.47626	0.483436	0.240745
0.454396	0.472626	0.258843
0.448803	0.458261	0.238686
1.66906	0.882342	0.473185
0.394332	0.465139	0.293536
0.433943	0.260029	0.252975
0.435582	0.260029	0.321555
0.509647	0.349913	0.359292
0.427044	0.217881	0.267292
1.63044	0.904832	0.475591
0.466114	0.481037	0.24876
0.447392	0.453146	0.248979
0.781726	0.715423	0.32072
1.59258	0.939854	0.496959
1.60911	0.935023	0.456307
0.122987	0.070628	0.126644
0.179066	0.118686	0.20609
0.130973	0.073873	0.112875
0.189808	0.124842	0.132441
0.218992	0.13593	0.193334
0.187852	0.126784	0.138978
0.196984	0.119642	0.206404
0.237202	0.14521	0.2015
0.508432	0.459478	0.237637
0.400436	0.231555	0.242602
0.425434	0.427864	0.243959
1.1616	0.871565	0.482572
1.1618	0.851446	0.499487
1.08098	0.823276	0.398304
1.12619	0.841573	0.429694
1.08981	0.84257	0.399904
1.72892	0.872498	0.462473
1.0894	0.882682	0.453086
1.0836	0.852099	0.44216
1.09489	0.808627	0.445476
0.391992	0.212067	0.239424
0.392176	0.216518	0.239486
0.443773	0.450022	0.252925
0.453171	0.449135	0.25902
0.47194	0.492373	0.251485
1.08654	0.827773	0.400328
0.432092	0.422417	0.224747
1.51895	0.892691	0.461708
1.49508	0.880763	0.460424
0.423189	0.462367	0.233405
0.532632	0.427917	0.210182
0.445624	0.470665	0.263585
0.440646	0.466134	0.268606
0.443378	0.470665	0.263585
0.410429	0.463358	0.243533
0.447454	0.463299	0.26468
0.41514	0.445035	0.249888
0.414353	0.234618	0.213326
1.60994	0.930394	0.44018
1.67033	0.924855	0.473634
1.54628	0.875456	0.473799
1.56909	0.859066	0.478244
1.02676	0.784213	0.430123
1.56311	0.881499	0.467659
0.477899	0.454282	0.266199
0.475553	0.451951	0.264687
1.62935	0.899161	0.450748
1.5686	0.925607	0.479741
0.52117	0.495917	0.23507
0.520387	0.496027	0.23507
1.15481	0.78904	0.425398
0.391124	0.312317	0.249362
0.389035	0.248493	0.24981
0.529586	0.421617	0.213645
0.297135	0.169464	0.163102
0.278223	0.161085	0.174329
0.423654	0.471713	0.248835
0.432384	0.450187	0.255467
1.26505	0.90214	0.421305
0.451376	0.480626	0.260009
0.537142	0.429296	0.214694
0.45353	0.473228	0.293741
1.60401	0.905355	0.429096
1.56291	0.893936	0.458007
1.63434	0.910513	0.45195
1.60916	0.903307	0.429114
1.59676	0.918301	0.443627
1.07649	0.766866	0.443676
0.779445	0.689389	0.402959
0.521499	0.498705	0.233998
1.09589	0.815513	0.393516
0.470329	0.532246	0.214616
0.703786	0.580344	0.38144
0.318403	0.267143	0.224728
1.63243	0.907529	0.449136
1.63725	0.895386	0.456864
0.476208	0.485685	0.239227
0.456604	0.471241	0.253101
0.464218	0.466684	0.244412
1.65618	0.887096	0.454288
0.403753	0.459804	0.277981
0.411017	0.253613	0.251189
0.41211	0.253613	0.313402
0.497226	0.337313	0.381659
0.407309	0.220467	0.249588
1.58807	0.893776	0.453956
0.471947	0.496496	0.243808
0.453257	0.474019	0.24384
0.773265	0.687457	0.321591
1.56042	0.928467	0.477439
1.57966	0.932912	0.446218
0.17107	0.110836	0.182056
0.023589	0.012799	0.040879
0.180725	0.115629	0.139683
0.207807	0.136284	0.193254
0.17857	0.118629	0.143303
0.186108	0.111958	0.182329
0.23735	0.141758	0.191752
0.511681	0.453699	0.245738
0.387707	0.227252	0.26354
0.405347	0.429816	0.269791
1.15307	0.861431	0.506364
1.15984	0.839474	0.534305
1.08614	0.826671	0.432455
1.12514	0.835266	0.449361
1.09256	0.84554	0.439456
1.73243	0.86277	0.461864
1.08396	0.877539	0.473282
1.09195	0.860483	0.460346
1.104	0.79935	0.447931
0.392127	0.215609	0.26458
0.392294	0.219025	0.26464
0.436718	0.445922	0.302569
0.443711	0.440083	0.302249
0.458751	0.481901	0.256992
1.09447	0.809117	0.417551
0.418485	0.417107	0.220286
1.5142	0.904531	0.454886
1.50136	0.878716	0.445308
0.410723	0.455714	0.270237
0.526356	0.433223	0.233379
0.438521	0.468164	0.269445
0.434647	0.468173	0.281964
0.437369	0.468164	0.269445
0.406982	0.451388	0.277528
0.439737	0.462569	0.277945
0.403913	0.437644	0.235155
0.399035	0.233198	0.251563
1.64567	0.911991	0.47169
1.66227	0.91372	0.494979
1.53463	0.872618	0.467775
1.56867	0.857664	0.504182
1.03983	0.774554	0.449895
1.56306	0.887484	0.482185
0.468446	0.450808	0.290184
0.465724	0.446804	0.29625
1.64078	0.888198	0.457043
1.57573	0.922487	0.500124
0.508031	0.489497	0.256617
0.508837	0.489766	0.256617
1.15581	0.791689	0.447038
0.365549	0.307611	0.267802
0.36216	0.248053	0.272177
0.528752	0.417547	0.214524
0.283666	0.167671	0.205905
0.265413	0.163163	0.205229
0.413773	0.454414	0.29334
0.422011	0.431146	0.295007
1.25138	0.883605	0.435275
0.436736	0.466771	0.294404
0.530086	0.424224	0.220455
0.446274	0.462556	0.283098
1.59997	0.903285	0.458084
1.57759	0.883464	0.461342
1.61925	0.907944	0.48415
1.60315	0.902827	0.456291
1.59889	0.916054	0.459536
1.09237	0.768986	0.462411
0.785653	0.678222	0.395304
0.50773	0.492078	0.264409
1.09963	0.82062	0.41688
0.455738	0.516863	0.255913
0.696193	0.576511	0.399895
0.302156	0.273318	0.264962
1.62724	0.892896	0.460597
1.63481	0.896407	0.452006
0.466265	0.483908	0.252065
0.45234	0.461472	0.278037
0.450243	0.464006	0.286964
1.67283	0.875874	0.476523
0.381426	0.449499	0.317064
0.403281	0.257776	0.282422
0.405654	0.257776	0.31227
0.494501	0.334446	0.364623
0.402712	0.219296	0.246795
1.59775	0.881026	0.463279
0.47096	0.487733	0.265224
0.448789	0.460605	0.26501
0.770213	0.687062	0.349547
1.58372	0.939428	0.509024
1.60823	0.933791	0.457989
0.173538	0.112749	0.162765
0.129546	0.126095	0.124942
0.183132	0.138906	0.133989
0.12864	0.126275	0.128527
1e-06	0.002766	0.002832
0.205567	0.151837	0.151162
0.441695	0.44082	0.259218
0.356879	0.223569	0.211033
0.387653	0.435795	0.240487
1.11947	0.845994	0.494338
1.12049	0.830635	0.494684
1.05785	0.822389	0.413335
1.10536	0.820275	0.455857
1.06179	0.836377	0.417242
1.73677	0.890109	0.461858
1.06439	0.873823	0.454052
1.0619	0.867932	0.444583
1.09027	0.801793	0.450786
0.369626	0.218072	0.220778
0.368347	0.219333	0.220943
0.390268	0.444368	0.276476
0.388245	0.436091	0.27067
0.432115	0.46691	0.276488
1.05641	0.807087	0.385435
0.402182	0.415597	0.232068
1.50115	0.884889	0.459076
1.47679	0.87727	0.461326
0.372801	0.439121	0.272659
0.459798	0.428629	0.233349
0.413353	0.449029	0.297075
0.408227	0.450442	0.293076
0.412441	0.449029	0.297075
0.405337	0.438107	0.282142
0.409849	0.447596	0.292397
0.375436	0.441962	0.239529
0.37791	0.227429	0.182503
1.62188	0.909061	0.482558
1.62773	0.907854	0.490282
1.52553	0.878314	0.506286
1.56766	0.853635	0.491259
0.9857	0.761944	0.447632
1.53337	0.879767	0.464828
0.428702	0.425807	0.264799
0.427247	0.426228	0.272999
1.60954	0.880176	0.451478
1.52802	0.919701	0.471754
0.479762	0.480224	0.245122
0.481744	0.478737	0.245122
1.10675	0.777456	0.415294
0.334941	0.304528	0.227933
0.334002	0.245412	0.228354
0.468985	0.410442	0.256496
0.248725	0.182731	0.172412
0.219575	0.176811	0.160972
0.398073	0.440952	0.278589
0.387518	0.427019	0.267516
1.22533	0.883797	0.415308
0.418414	0.452006	0.295144
0.482481	0.412853	0.241555
0.407184	0.456764	0.262249
1.57629	0.893226	0.456621
1.56839	0.885784	0.457355
1.60121	0.909191	0.467073
1.5828	0.894282	0.454858
1.58266	0.921577	0.480754
1.06078	0.763978	0.429351
0.752272	0.663709	0.363994
0.478279	0.47787	0.267016
1.06446	0.808233	0.380015
0.438961	0.49511	0.260041
0.6865	0.59518	0.346139
0.288215	0.260663	0.221515
1.58888	0.908633	0.445901
1.65275	0.905843	0.445228
0.436622	0.466894	0.263362
0.426943	0.451061	0.250282
0.421416	0.44598	0.266581
1.64089	0.873426	0.459999
0.398935	0.449642	0.294973
0.371434	0.253698	0.22621
0.372483	0.253698	0.273442
0.455619	0.348999	0.413122
0.386561	0.219507	0.243133
1.59176	0.894054	0.45603
0.423511	0.478274	0.242062
0.412973	0.449559	0.241872
0.735406	0.684637	0.29756
1.55977	0.915963	0.485686
1.57421	0.913657	0.443026
0.186028	0.116847	0.106252
0.210384	0.133292	0.150229
0.18252	0.119854	0.109678
0.18884	0.113881	0.162145
0.24231	0.14003	0.158954
0.510655	0.453567	0.228896
0.387754	0.228538	0.235857
0.40666	0.432266	0.249486
1.15066	0.853139	0.475462
1.16111	0.841538	0.509296
1.08704	0.820688	0.399192
1.12733	0.832696	0.432784
1.09344	0.835451	0.406082
1.73242	0.869228	0.452645
1.08277	0.874733	0.443133
1.09225	0.856206	0.443121
1.10161	0.793883	0.430656
0.395328	0.213359	0.236323
0.395497	0.216656	0.236384
0.43357	0.446415	0.281704
0.439874	0.445006	0.281402
0.45998	0.476634	0.263852
1.09907	0.804907	0.391624
0.417776	0.418013	0.193972
1.52321	0.902625	0.448242
1.50224	0.873749	0.439787
0.4093	0.453999	0.230663
0.530144	0.428966	0.215194
0.438496	0.467469	0.260428
0.434886	0.46482	0.272814
0.437344	0.467469	0.260428
0.406333	0.450976	0.261115
0.439296	0.4611	0.268832
0.403311	0.436359	0.215024
0.40581	0.233062	0.223405
1.64601	0.911959	0.459016
1.66371	0.913133	0.472297
1.53676	0.870927	0.454665
1.57712	0.858809	0.494486
1.04054	0.772649	0.419832
1.56324	0.885855	0.459304
0.469889	0.449115	0.26259
0.466853	0.445568	0.268474
1.63689	0.886506	0.447993
1.5749	0.92219	0.49053
0.505742	0.486683	0.220994
0.506826	0.486954	0.220994
1.15237	0.791628	0.424656
0.368562	0.312103	0.244474
0.364905	0.252819	0.248705
0.526295	0.416259	0.200169
0.288715	0.168444	0.176323
0.268549	0.162326	0.178941
0.411388	0.456853	0.27012
0.421001	0.432916	0.257446
1.24433	0.883236	0.403891
0.43675	0.460457	0.268535
0.531953	0.424036	0.19229
0.445498	0.461329	0.26563
1.60527	0.902861	0.448847
1.58009	0.880859	0.447383
1.62082	0.907377	0.474671
1.60844	0.901817	0.447088
1.6073	0.91345	0.450377
1.09403	0.767417	0.448461
0.787491	0.674929	0.387886
0.504129	0.489263	0.235968
1.09767	0.821411	0.388657
0.455215	0.516091	0.234778
0.697646	0.580454	0.361535
0.303054	0.267708	0.231065
1.62452	0.893318	0.450828
1.63646	0.898217	0.446447
0.464608	0.483115	0.209245
0.451688	0.458293	0.253708
0.447766	0.458861	0.239473
1.67036	0.869505	0.467034
0.381387	0.452755	0.291538
0.401656	0.258981	0.251302
0.404874	0.258981	0.305155
0.490029	0.336122	0.355323
0.406106	0.22219	0.247264
1.6013	0.878293	0.456748
0.467723	0.485966	0.245683
0.445698	0.459331	0.245485
0.769894	0.690007	0.307511
1.59241	0.938132	0.494208
1.61203	0.928591	0.4487
0.209495	0.15319	0.110288
0.013575	0.006447	0.008552
0.146589	0.129335	0.124444
0.219488	0.159418	0.134717
0.502054	0.466066	0.244579
0.381283	0.233894	0.216594
0.413821	0.452305	0.229466
1.16745	0.859102	0.466291
1.15466	0.840912	0.48895
1.09617	0.836029	0.390915
1.13943	0.844169	0.437381
1.10284	0.851409	0.402884
1.75959	0.879972	0.442896
1.0872	0.876878	0.423067
1.0932	0.867355	0.449112
1.11101	0.810832	0.422543
0.393988	0.223507	0.229156
0.392881	0.229299	0.222516
0.437781	0.4415	0.26407
0.447218	0.443656	0.277833
0.459543	0.477767	0.258122
1.0829	0.815976	0.395519
0.426831	0.420014	0.210744
1.542	0.885599	0.423334
1.5166	0.864467	0.44006
0.422683	0.467643	0.22733
0.522512	0.444495	0.217052
0.445393	0.48314	0.267413
0.437269	0.484013	0.273759
0.444532	0.48314	0.267413
0.40743	0.472146	0.246684
0.442402	0.477301	0.270517
0.400753	0.451054	0.229941
0.414549	0.243255	0.200378
1.64617	0.89766	0.452767
1.66111	0.914571	0.457129
1.54381	0.879224	0.472591
1.5783	0.847324	0.471082
1.01468	0.781885	0.416053
1.56148	0.892548	0.437051
0.472263	0.438113	0.251217
0.468803	0.43406	0.252182
1.61449	0.895808	0.431357
1.57258	0.930552	0.466082
0.513549	0.489163	0.224015
0.514726	0.489281	0.224015
1.14159	0.763938	0.423715
0.374968	0.327094	0.23248
0.373345	0.261843	0.233081
0.506838	0.429933	0.217811
0.266902	0.176416	0.152677
0.250247	0.175581	0.142311
0.421328	0.459938	0.26209
0.420282	0.444572	0.246134
1.25591	0.88783	0.405925
0.444596	0.469067	0.27516
0.506225	0.427346	0.206536
0.438752	0.459927	0.252437
1.5883	0.905655	0.438762
1.59065	0.87572	0.438054
1.6077	0.915756	0.450327
1.59401	0.906342	0.437052
1.59824	0.92005	0.453018
1.09344	0.770253	0.434059
0.79407	0.669051	0.380366
0.517871	0.488375	0.233967
1.08521	0.806695	0.373217
0.466959	0.527858	0.231791
0.699413	0.593335	0.35869
0.303041	0.272125	0.226192
1.61876	0.924413	0.420453
1.63226	0.893291	0.437091
0.468861	0.488292	0.230171
0.455931	0.471822	0.255341
0.458106	0.467399	0.243827
1.67267	0.867038	0.438271
0.382474	0.462862	0.3012
0.404597	0.271599	0.243341
0.405189	0.271599	0.298338
0.47818	0.342349	0.34773
0.413506	0.219477	0.252822
1.61788	0.877089	0.444826
0.465946	0.488774	0.241672
0.444543	0.456933	0.245246
0.763449	0.701536	0.30542
1.59336	0.92647	0.457772
1.60608	0.910616	0.431577
0.208069	0.153637	0.110645
0.209605	0.14211	0.133452
0.110085	0.08	0.061282
0.481708	0.468756	0.283697
0.387392	0.227912	0.200873
0.402668	0.419089	0.227842
1.15328	0.85778	0.463689
1.13933	0.852259	0.501149
1.08668	0.853788	0.413599
1.12047	0.818942	0.42998
1.0931	0.860674	0.429335
1.74853	0.885998	0.458273
1.06605	0.862346	0.456567
1.07424	0.884904	0.450945
1.07708	0.824311	0.422404
0.387951	0.211806	0.207731
0.387019	0.212556	0.211702
0.431432	0.435309	0.287206
0.441688	0.440046	0.303442
0.470289	0.459705	0.287017
1.07577	0.807333	0.429251
0.406663	0.409944	0.230134
1.53311	0.864421	0.490395
1.49661	0.863135	0.462667
0.403541	0.437296	0.238676
0.505253	0.445089	0.248485
0.448865	0.465581	0.302131
0.43733	0.451971	0.305016
0.448281	0.465581	0.302131
0.403914	0.443062	0.271162
0.440446	0.450927	0.301648
0.385351	0.423721	0.219027
0.417827	0.242822	0.192258
1.63019	0.896215	0.483552
1.64458	0.912212	0.478131
1.54732	0.857486	0.476762
1.58288	0.84721	0.485802
1.01835	0.746075	0.451404
1.5639	0.869599	0.476207
0.472215	0.435426	0.289341
0.464662	0.431092	0.287909
1.61211	0.887406	0.456992
1.56231	0.895546	0.490345
0.495321	0.48146	0.232575
0.49621	0.482313	0.232575
1.13353	0.784646	0.429124
0.378449	0.313945	0.218121
0.377643	0.248926	0.21853
0.50735	0.419371	0.189119
0.281794	0.183309	0.194156
0.259179	0.179191	0.1859
0.415285	0.451345	0.283683
0.417539	0.423199	0.257088
1.24469	0.886075	0.415961
0.443807	0.443894	0.284528
0.502268	0.404419	0.191222
0.435208	0.452932	0.283429
1.5797	0.893831	0.455019
1.56465	0.878594	0.458962
1.60581	0.890789	0.477937
1.58659	0.894553	0.453231
1.59427	0.90736	0.46886
1.07247	0.767073	0.43476
0.788821	0.671392	0.383061
0.492912	0.480185	0.257962
1.07752	0.820833	0.403183
0.459544	0.503151	0.271505
0.700781	0.592374	0.360637
0.309557	0.256335	0.204009
1.61181	0.896532	0.454876
1.64666	0.902859	0.460287
0.461847	0.476113	0.252493
0.447695	0.460029	0.269907
0.451172	0.45332	0.273122
1.65324	0.873988	0.491126
0.382955	0.438563	0.301065
0.403678	0.256689	0.222461
0.404024	0.256689	0.277382
0.488093	0.333707	0.361568
0.396517	0.213446	0.238802
1.62396	0.886569	0.468327
0.454358	0.46562	0.272385
0.436734	0.439569	0.268775
0.762888	0.674565	0.31081
1.58216	0.915204	0.479768
1.57842	0.927582	0.459679
0.14569	0.129518	0.128016
0.21753	0.157935	0.141464
0.502609	0.467132	0.241045
0.385479	0.23122	0.217349
0.412934	0.453434	0.236888
1.16952	0.85911	0.463247
1.15856	0.838789	0.48506
1.10119	0.834308	0.395471
1.14536	0.843465	0.438436
1.1079	0.849214	0.407446
1.76824	0.877385	0.447819
1.09105	0.874184	0.430674
1.09753	0.866472	0.449993
1.11358	0.809389	0.423551
0.391856	0.221469	0.2295
0.390753	0.227271	0.222848
0.43695	0.441731	0.269972
0.445523	0.442713	0.283824
0.458549	0.480126	0.26396
1.08823	0.814655	0.400093
0.429632	0.420256	0.218072
1.55024	0.882137	0.428384
1.52131	0.865992	0.445196
0.423066	0.46695	0.232952
0.520402	0.446701	0.210008
0.445122	0.483098	0.273332
0.437014	0.483516	0.279725
0.443298	0.483098	0.273332
0.406317	0.472106	0.25242
0.440869	0.476807	0.276455
0.402177	0.452086	0.230362
0.417092	0.240727	0.211393
1.65623	0.89623	0.453863
1.67063	0.915231	0.462305
1.55128	0.878473	0.473771
1.57587	0.847466	0.472245
1.01757	0.779624	0.420808
1.56439	0.890824	0.438105
0.469899	0.43808	0.257046
0.46831	0.434027	0.258031
1.61762	0.8936	0.432209
1.58066	0.930171	0.46703
0.512146	0.491007	0.233312
0.512696	0.491123	0.233312
1.14397	0.764641	0.419717
0.375737	0.326909	0.229426
0.373009	0.261429	0.230022
0.506903	0.432312	0.214781
0.26556	0.177045	0.159767
0.248641	0.176215	0.149311
0.423395	0.46033	0.271931
0.419147	0.445155	0.25191
1.25724	0.883655	0.41515
0.443309	0.467986	0.28121
0.504923	0.429217	0.206898
0.437313	0.460957	0.262135
1.59604	0.903391	0.439133
1.60244	0.876431	0.438935
1.61682	0.913296	0.451234
1.60174	0.904531	0.437418
1.60248	0.91921	0.453931
1.09815	0.768	0.433943
0.793526	0.669192	0.391194
0.513872	0.488322	0.239973
1.08547	0.804281	0.375991
0.46803	0.529874	0.237413
0.698494	0.589781	0.361609
0.306423	0.272009	0.231111
1.61774	0.921311	0.426461
1.64085	0.889236	0.442232
0.468165	0.489373	0.239707
0.455988	0.473074	0.265241
0.459388	0.468645	0.249616
1.68165	0.867905	0.443261
0.383009	0.463738	0.307455
0.405938	0.270914	0.251022
0.406884	0.270914	0.298873
0.478197	0.341913	0.352612
0.412016	0.217985	0.261187
1.6215	0.875662	0.449807
0.466699	0.486874	0.243696
0.445287	0.4556	0.24729
0.767596	0.701849	0.309383
1.60271	0.925576	0.456786
1.6152	0.910176	0.432643
0.234302	0.155038	0.147703
0.493922	0.444631	0.255287
0.402212	0.227009	0.211033
0.427076	0.439318	0.244897
1.15308	0.849614	0.49293
1.15061	0.831576	0.489674
1.08083	0.826725	0.412077
1.12859	0.821695	0.455857
1.0847	0.841494	0.415988
1.75219	0.890465	0.461858
1.08406	0.875674	0.449149
1.08446	0.868745	0.443275
1.10902	0.802909	0.450786
0.404231	0.219593	0.219984
0.402779	0.220847	0.220148
0.440195	0.444367	0.275544
0.444912	0.436087	0.269756
0.468309	0.470849	0.275552
1.07923	0.810092	0.390921
0.442181	0.418978	0.231244
1.51575	0.88914	0.459076
1.50206	0.882419	0.461326
0.421211	0.442476	0.271716
0.51358	0.430601	0.232526
0.451769	0.450884	0.296093
0.444934	0.4523	0.292102
0.450664	0.450884	0.296093
0.405337	0.439795	0.281199
0.447086	0.450077	0.291427
0.410119	0.447001	0.238679
0.423529	0.230994	0.181809
1.64447	0.908012	0.482558
1.66446	0.91013	0.490282
1.5373	0.881789	0.506286
1.57908	0.856888	0.491259
1.01823	0.763708	0.447632
1.54469	0.883631	0.464828
0.475962	0.428627	0.263885
0.468751	0.429052	0.272067
1.63812	0.881412	0.451478
1.56355	0.922044	0.471754
0.517139	0.4828	0.244262
0.518669	0.481306	0.244262
1.13432	0.777625	0.414028
0.385081	0.308326	0.22711
0.384083	0.248904	0.227529
0.508773	0.413655	0.252554
0.275271	0.186217	0.172674
0.24606	0.179086	0.157434
0.433715	0.444334	0.277648
0.426694	0.429456	0.266598
1.24736	0.883616	0.414056
0.455189	0.451685	0.294156
0.51819	0.416093	0.237661
0.438823	0.459258	0.258261
1.58994	0.891914	0.456621
1.58736	0.888818	0.457355
1.61295	0.910585	0.467073
1.59296	0.895048	0.454858
1.60644	0.922275	0.480754
1.08322	0.767257	0.429351
0.796154	0.663671	0.369359
0.515345	0.480438	0.266098
1.08335	0.81296	0.380015
0.473295	0.499009	0.260468
0.698955	0.59518	0.345015
0.309259	0.263246	0.217757
1.60375	0.909001	0.445901
1.68227	0.908562	0.445228
0.475974	0.469486	0.262445
0.45671	0.453561	0.249388
0.452881	0.448465	0.265646
1.66307	0.876107	0.459999
0.398935	0.45159	0.293993
0.414353	0.255987	0.226573
0.415348	0.255987	0.273937
0.492696	0.350553	0.411807
0.423355	0.22212	0.24218
1.61607	0.895568	0.45603
0.473164	0.480485	0.241209
0.454238	0.451483	0.241021
0.76483	0.684595	0.29657
1.59068	0.91991	0.485686
1.5898	0.914329	0.443026
0.496745	0.475096	0.285436
0.414009	0.251209	0.221997
0.426269	0.443156	0.22185
1.16836	0.873139	0.477967
1.1444	0.869411	0.510936
1.10303	0.859463	0.405927
1.13574	0.835005	0.447979
1.10708	0.868207	0.418494
1.75205	0.881947	0.469696
1.09134	0.878792	0.448652
1.08869	0.892331	0.468125
1.0937	0.834155	0.449429
0.406174	0.230066	0.213455
0.40459	0.235083	0.217442
0.440997	0.446572	0.282517
0.448801	0.451231	0.289939
0.476906	0.46852	0.27768
1.08974	0.821185	0.391676
0.42548	0.435079	0.229043
1.54919	0.896386	0.484306
1.50911	0.889207	0.448762
0.420689	0.461757	0.2467
0.535306	0.461737	0.249178
0.463674	0.471791	0.286475
0.454406	0.463091	0.289155
0.463501	0.471791	0.286475
0.420416	0.455205	0.270246
0.457569	0.461078	0.285839
0.408025	0.44561	0.222326
0.450078	0.265587	0.200182
1.64739	0.914399	0.485581
1.66133	0.931637	0.479148
1.5676	0.884506	0.472434
1.59334	0.864097	0.490461
1.01866	0.774223	0.442916
1.58067	0.898208	0.46941
0.48989	0.445787	0.268202
0.486062	0.443868	0.276275
1.64015	0.90743	0.473197
1.57971	0.909414	0.493456
0.517118	0.499518	0.222863
0.517738	0.499681	0.222863
1.14641	0.793557	0.413909
0.401267	0.33475	0.230118
0.40053	0.27046	0.230544
0.519833	0.436564	0.190765
0.30722	0.199206	0.181729
0.285641	0.191834	0.170284
0.432644	0.471139	0.276617
0.423845	0.433161	0.254689
1.25213	0.909836	0.411014
0.45579	0.458453	0.277002
0.522656	0.427644	0.20742
0.440546	0.470729	0.28426
1.59735	0.917279	0.467098
1.5769	0.914783	0.471678
1.61842	0.916431	0.474605
1.60443	0.90752	0.465283
1.61106	0.933502	0.475104
1.089	0.787459	0.43439
0.808568	0.688934	0.390996
0.51757	0.49779	0.246659
1.10022	0.83858	0.400069
0.46644	0.512977	0.268007
0.711037	0.594351	0.359703
0.332526	0.266051	0.224751
1.61612	0.909332	0.457212
1.66135	0.909935	0.468753
0.463041	0.497402	0.267618
0.457571	0.4853	0.283017
0.452731	0.483154	0.27457
1.66592	0.89491	0.479755
0.403755	0.468283	0.291933
0.426617	0.269968	0.224023
0.427667	0.269968	0.28267
0.502609	0.355169	0.359991
0.421742	0.231358	0.242337
1.63244	0.901833	0.4647
0.467002	0.479573	0.269898
0.449932	0.45038	0.273587
0.776513	0.704151	0.314863
1.58164	0.930936	0.475129
1.59252	0.953531	0.454871
0.523722	0.461774	0.275062
0.478143	0.497743	0.251995
1.1916	0.983782	0.502815
1.1777	0.95873	0.514327
1.15574	0.968525	0.424713
1.20063	0.962076	0.455948
1.15546	0.991138	0.451636
1.74116	1.02207	0.495418
1.11427	0.966044	0.461283
1.14936	1.00701	0.463754
1.16568	0.951992	0.485424
0.537307	0.42808	0.269984
0.538648	0.439765	0.269796
0.475269	0.497498	0.233211
0.478601	0.495235	0.221912
0.490435	0.523471	0.237702
1.13224	0.936627	0.42632
0.461931	0.464197	0.204048
1.55872	1.01384	0.486897
1.53076	1.02156	0.482153
0.462536	0.499821	0.226039
0.234325	0.232204	0.158517
0.488494	0.496898	0.239193
0.477665	0.507889	0.227081
0.487781	0.496898	0.239193
0.434018	0.490906	0.228704
0.479019	0.500002	0.231226
0.467083	0.46821	0.224514
0.54622	0.485557	0.260248
1.67504	1.05865	0.489141
1.65362	1.05828	0.521806
1.55209	0.954155	0.507446
1.60911	0.972161	0.510836
1.0506	0.89366	0.45808
1.58449	0.99935	0.489566
0.477725	0.492631	0.251798
0.485764	0.495458	0.249662
1.65595	0.993044	0.476891
1.58976	1.02938	0.511341
0.52037	0.535776	0.216984
0.522093	0.536714	0.216984
1.166	0.882203	0.434645
0.495407	0.548609	0.243093
0.493867	0.483267	0.251978
0.393321	0.433022	0.201677
0.515821	0.453611	0.272384
0.515069	0.455171	0.279755
0.493713	0.514627	0.228953
0.47381	0.4937	0.22149
1.26783	0.997933	0.457934
0.480532	0.502629	0.226998
0.403579	0.440212	0.184192
0.485133	0.531836	0.227149
1.58782	0.985589	0.488385
1.60424	0.992534	0.485212
1.6107	1.0072	0.503171
1.59874	0.99155	0.492085
1.60519	0.984499	0.506736
1.15611	0.895002	0.459419
0.814611	0.747363	0.447918
0.524725	0.541099	0.210375
1.14588	0.95979	0.423061
0.514387	0.582941	0.242589
0.75841	0.71374	0.397327
0.491164	0.470758	0.252864
1.67682	0.97462	0.46749
1.67789	1.02496	0.483448
0.526621	0.524635	0.228903
0.485984	0.508364	0.213391
0.484699	0.533377	0.227581
1.66791	0.966046	0.52237
0.436924	0.4896	0.244178
0.530217	0.484249	0.287873
0.531151	0.484249	0.352172
0.521545	0.421391	0.37769
0.543259	0.409809	0.329951
1.66599	1.02223	0.484753
0.485714	0.503608	0.223791
0.469928	0.495244	0.227325
0.806009	0.808477	0.367019
1.59657	1.07385	0.508457
1.61861	1.02771	0.491032
0.458133	0.45552	0.240359
1.14538	0.934228	0.435353
1.13694	0.889584	0.442718
1.09922	0.880509	0.387688
1.1635	0.864543	0.432172
1.10329	0.89467	0.39397
1.74427	0.924136	0.457634
1.08523	0.909853	0.42508
1.10284	0.900059	0.410643
1.09985	0.872557	0.42986
0.351588	0.175562	0.201364
0.347951	0.179043	0.197571
0.469675	0.45948	0.286227
0.475029	0.455095	0.281678
0.49744	0.499731	0.298961
1.08901	0.848952	0.380494
0.460776	0.432212	0.258779
1.51401	0.917849	0.449526
1.46584	0.910905	0.448782
0.424719	0.455599	0.255963
0.516922	0.438608	0.257749
0.510766	0.48395	0.297332
0.504866	0.473916	0.29742
0.510787	0.48395	0.297332
0.455388	0.470775	0.294825
0.505544	0.471135	0.296716
0.455459	0.442824	0.246126
0.130453	0.069494	0.124704
1.59549	0.945596	0.440327
1.62756	0.948253	0.482326
1.54116	0.909213	0.471209
1.56967	0.905879	0.483958
1.0422	0.800397	0.392302
1.54952	0.912012	0.47649
0.499281	0.480995	0.31786
0.500332	0.478335	0.324212
1.59775	0.904266	0.45231
1.55318	0.944047	0.471597
0.543432	0.501928	0.257882
0.544031	0.503945	0.257882
1.1526	0.836838	0.42165
0.162575	0.178169	0.117426
0.160265	0.124649	0.11861
0.541374	0.429627	0.213204
0.421407	0.246567	0.185838
0.40945	0.229628	0.198315
0.471495	0.475276	0.281378
0.473765	0.449058	0.257491
1.27675	0.940469	0.369347
0.479558	0.487373	0.298056
0.557193	0.429739	0.219363
0.463787	0.505302	0.283667
1.56691	0.948358	0.449001
1.51115	0.894936	0.454844
1.58392	0.945742	0.475746
1.57503	0.940517	0.455096
1.57129	0.9582	0.468108
1.10672	0.843051	0.423179
0.778694	0.680877	0.399607
0.545576	0.506508	0.258801
1.10171	0.871795	0.355057
0.503838	0.526214	0.26044
0.723854	0.610001	0.413706
0.368627	0.287942	0.232785
1.6101	0.926013	0.448617
1.60907	0.937065	0.448237
0.499057	0.499658	0.25552
0.501406	0.500401	0.264907
0.490324	0.49397	0.287758
1.61651	0.88982	0.469637
0.435331	0.474269	0.302597
0.356067	0.232324	0.237421
0.355117	0.232324	0.268644
0.508187	0.34615	0.388574
0.351047	0.174556	0.257303
1.58054	0.929849	0.440622
0.504006	0.476738	0.259532
0.488862	0.45747	0.261006
0.75308	0.737041	0.326209
1.55992	0.966961	0.490799
1.59161	0.945695	0.471762
1.15558	0.970144	0.493819
1.14204	0.922564	0.495334
1.09918	0.924906	0.388688
1.12453	0.901044	0.434185
1.10648	0.94463	0.402525
1.74412	1.00566	0.489946
1.09023	0.951899	0.433892
1.09954	0.962247	0.403972
1.06352	0.899448	0.441608
0.454427	0.423907	0.268896
0.45342	0.432598	0.267069
0.29006	0.334378	0.167445
0.294142	0.339084	0.168313
0.356636	0.384472	0.210001
1.07428	0.892615	0.401864
0.200021	0.231411	0.135298
1.56224	0.969252	0.472677
1.54509	0.957137	0.45701
0.296175	0.345083	0.153504
0.495942	0.457147	0.204184
0.319348	0.345904	0.223995
0.32174	0.357959	0.21161
0.320649	0.345904	0.223995
0.281605	0.343268	0.200063
0.323215	0.356507	0.218393
0.172609	0.277679	0.111061
0.502729	0.481982	0.258394
1.67924	1.02384	0.477321
1.66967	1.03582	0.494321
1.54514	0.948462	0.486879
1.59057	0.946576	0.502359
1.0395	0.831256	0.441121
1.56087	0.938184	0.489382
0.35269	0.36237	0.162027
0.350877	0.360551	0.165125
1.64973	0.989664	0.472281
1.60833	1.01157	0.497824
0.381577	0.402625	0.159734
0.381639	0.402891	0.159734
1.12351	0.86222	0.425317
0.44665	0.54836	0.261504
0.443374	0.481776	0.255132
0.495176	0.475201	0.169074
0.463917	0.444454	0.208749
0.454422	0.436174	0.228892
0.314008	0.353376	0.170045
0.290228	0.333201	0.202119
1.29562	0.976483	0.442214
0.315685	0.36955	0.168893
0.493705	0.460666	0.168024
0.327167	0.387226	0.206604
1.60313	0.998371	0.47759
1.56652	0.979811	0.481726
1.6255	1.01767	0.476881
1.60915	0.989885	0.481869
1.62774	0.991747	0.497837
1.11413	0.839998	0.470894
0.780336	0.706542	0.390964
0.383678	0.404729	0.178482
1.10866	0.907339	0.407431
0.358566	0.44806	0.209801
0.695731	0.639114	0.396608
0.409814	0.409771	0.226901
1.65694	0.975154	0.476504
1.66216	1.00885	0.489311
0.359318	0.419454	0.242542
0.341758	0.392693	0.232545
0.319233	0.381038	0.240201
1.67522	0.964716	0.49186
0.291207	0.351033	0.206268
0.471751	0.475516	0.270577
0.470536	0.475516	0.332423
0.428298	0.36716	0.360818
0.473082	0.4122	0.307826
1.66081	1.00268	0.486987
0.324951	0.383744	0.158969
0.314106	0.369549	0.159838
0.759863	0.765152	0.350346
1.60024	1.00667	0.463963
1.62078	1.01697	0.464076
0.413195	0.337245	0.15029
1.03539	0.809339	0.264787
1.08651	0.773948	0.328537
1.03294	0.831114	0.267193
1.6271	0.792433	0.347731
1.05045	0.834248	0.331799
1.05286	0.848287	0.250062
1.04044	0.748229	0.315453
1.16311	0.876402	0.461956
1.16336	0.884177	0.463258
1.15516	0.888559	0.491738
1.14945	0.873452	0.497341
1.17446	0.930584	0.505238
1.05328	0.800504	0.305119
1.15606	0.935817	0.457412
1.50981	0.822705	0.341565
1.48316	0.784334	0.343613
1.18134	0.927471	0.447711
1.19165	0.95246	0.495348
1.16513	0.894847	0.481236
1.15117	0.908158	0.489628
1.16374	0.894847	0.481236
1.11724	0.913865	0.490226
1.15445	0.89778	0.486691
1.15385	0.941935	0.489584
1.15692	0.941114	0.448791
1.5712	0.838196	0.339221
1.55761	0.818853	0.338834
1.46915	0.806025	0.259038
1.52022	0.806955	0.325325
0.798656	0.65257	0.288241
1.49196	0.786761	0.292713
1.15607	0.903213	0.529096
1.16303	0.904724	0.541258
1.55051	0.817677	0.324444
1.54868	0.8151	0.317126
1.12933	0.94888	0.507197
1.12982	0.949003	0.507197
0.643496	0.521081	0.24884
1.15587	1.01391	0.41706
1.15511	0.934462	0.415774
1.20436	0.966029	0.463765
1.17755	0.889448	0.487248
1.16378	0.892066	0.502734
1.16628	0.946187	0.513697
1.13984	0.927266	0.465767
0.788665	0.681613	0.276579
1.15352	0.937367	0.522064
1.20332	0.938661	0.464052
1.1529	0.941266	0.509133
1.50898	0.804179	0.338796
1.53859	0.795708	0.306337
1.52902	0.805527	0.356073
1.51606	0.805996	0.33395
1.5317	0.809847	0.315832
1.07786	0.723164	0.276607
1.23361	0.861772	0.420501
1.13076	0.953175	0.497005
1.06584	0.787169	0.274896
1.13501	0.976132	0.494771
0.982277	0.756409	0.373872
1.11864	0.902204	0.506155
1.56097	0.844514	0.343984
1.56546	0.841884	0.332166
1.1318	0.945443	0.490532
1.121	0.928475	0.49637
1.15713	0.92713	0.507835
1.57141	0.825953	0.290811
1.12112	0.902643	0.49204
1.17266	0.934957	0.512845
1.1666	0.934957	0.565002
1.21675	0.771893	0.561403
1.17397	0.869749	0.530457
1.49859	0.837929	0.298444
1.14379	0.849248	0.491987
1.14034	0.85685	0.496304
0.999363	0.950404	0.391161
1.5586	0.831707	0.323904
1.52436	0.823317	0.317284
1.00429	0.818005	0.276428
1.01168	0.77161	0.327496
0.999459	0.829526	0.263298
1.61732	0.816498	0.361415
1.00326	0.839233	0.341525
0.996811	0.845419	0.240958
0.992846	0.752398	0.317782
1.13287	0.856202	0.499028
1.13286	0.861556	0.500424
1.13384	0.881409	0.514625
1.14609	0.865947	0.521698
1.1598	0.911703	0.508252
0.999749	0.805351	0.314528
1.15152	0.898736	0.480935
1.4923	0.811929	0.366
1.48278	0.812122	0.3757
1.15429	0.886622	0.488583
1.16733	0.935832	0.524895
1.15405	0.889008	0.46903
1.14118	0.890259	0.483896
1.15532	0.889008	0.46903
1.12507	0.896724	0.48313
1.14329	0.886925	0.477478
1.15224	0.932265	0.510199
1.1364	0.899769	0.459262
1.56814	0.838262	0.373259
1.57982	0.85657	0.348374
1.46648	0.813865	0.287915
1.46021	0.791894	0.326329
0.784875	0.640977	0.292801
1.44172	0.786519	0.322911
1.14512	0.884573	0.539117
1.14796	0.889132	0.54779
1.53578	0.801745	0.330687
1.56264	0.822744	0.313424
1.1271	0.921755	0.533688
1.12883	0.920835	0.533688
0.621345	0.464583	0.241302
1.14866	0.98148	0.433906
1.14664	0.899668	0.433762
1.16512	0.951368	0.482912
1.14656	0.875398	0.484627
1.15364	0.869338	0.487322
1.12605	0.913198	0.51985
1.14177	0.902498	0.475477
0.770844	0.671452	0.287486
1.14816	0.926977	0.532113
1.16625	0.911408	0.455003
1.15056	0.917935	0.535427
1.52966	0.819697	0.355737
1.53464	0.8007	0.329737
1.54436	0.8445	0.364528
1.5334	0.820639	0.354936
1.49654	0.814665	0.32255
1.02633	0.718816	0.284695
1.20132	0.873832	0.464038
1.13356	0.922204	0.521409
1.01826	0.787039	0.280983
1.13842	0.961407	0.506989
0.950849	0.779933	0.407012
1.10778	0.874393	0.512751
1.54755	0.83135	0.359945
1.5404	0.832034	0.351845
1.12081	0.890231	0.516802
1.12193	0.894946	0.52853
1.14	0.88341	0.547513
1.58269	0.82774	0.311785
1.12117	0.877163	0.515248
1.14366	0.907001	0.501085
1.13799	0.907001	0.571051
1.18236	0.753276	0.560063
1.14796	0.846552	0.550599
1.52032	0.844259	0.327005
1.13274	0.862375	0.522872
1.12776	0.867527	0.518745
0.94985	0.930628	0.403907
1.4964	0.800958	0.316988
1.48619	0.837237	0.320383
0.411692	0.469013	0.197439
0.024927	0.035777	0.038176
1.54027	0.768234	0.242117
0.249783	0.284247	0.162684
0.164236	0.163729	0.125653
0.395815	0.499604	0.181728
1.09311	0.842962	0.413974
1.08926	0.851877	0.410105
1.09772	0.905879	0.369919
1.09181	0.897597	0.360687
1.09329	0.914911	0.380568
0.30889	0.501855	0.118035
1.07604	0.916349	0.352761
1.47004	0.794559	0.264829
1.48608	0.819471	0.269589
1.0805	0.900338	0.370838
1.12506	0.92741	0.412169
1.09647	0.904944	0.32759
1.09812	0.911499	0.341555
1.09365	0.904944	0.32759
1.09004	0.906604	0.346804
1.09981	0.907349	0.336584
1.08696	0.935469	0.399397
1.0871	0.873554	0.397059
1.54755	0.833807	0.265596
1.59275	0.830644	0.270833
1.49844	0.773782	0.24059
1.54255	0.825121	0.268236
0.873331	0.723746	0.168128
1.53792	0.811243	0.254962
1.09264	0.922145	0.407463
1.10994	0.919501	0.414732
1.49995	0.826553	0.257875
1.52637	0.822357	0.269049
1.09512	0.890099	0.409951
1.0979	0.890492	0.409951
0.976049	0.741224	0.209615
1.06862	0.967004	0.380401
1.06952	0.889379	0.377105
1.13777	0.911687	0.392225
1.10981	0.85564	0.398065
1.1006	0.844805	0.411712
1.11193	0.914577	0.386313
1.09251	0.879217	0.336769
1.15605	0.819414	0.20937
1.1059	0.939365	0.401278
1.11814	0.904039	0.384245
1.09457	0.936641	0.393244
1.48268	0.806459	0.257989
1.50389	0.791421	0.261005
1.51029	0.814437	0.261835
1.50744	0.814551	0.257465
1.54831	0.810176	0.282023
0.268581	0.442603	0.199931
1.13737	0.859726	0.347017
1.09408	0.897171	0.392096
0.262425	0.349704	0.110378
1.08237	0.954416	0.373732
0.935355	0.787548	0.268385
1.09342	0.838544	0.430375
1.45472	0.848894	0.25987
1.56742	0.817057	0.272786
1.0924	0.953182	0.372043
1.0867	0.900641	0.398393
1.10798	0.914809	0.360625
1.57193	0.794665	0.246234
1.06413	0.883217	0.358217
1.08696	0.939181	0.406924
1.08451	0.939181	0.459976
1.11089	0.692846	0.476605
1.09635	0.851386	0.458173
1.52474	0.854309	0.255702
1.09495	0.896285	0.374107
1.09341	0.885106	0.378135
0.963559	0.984467	0.275849
1.52109	0.812024	0.310593
1.52441	0.806835	0.268195
0.407494	0.476774	0.201459
1.6113	0.794507	0.250945
0.408629	0.489659	0.224678
0.411029	0.503264	0.208717
0.360726	0.329394	0.127607
1.14967	0.810061	0.464769
1.14543	0.819087	0.463238
1.14389	0.900891	0.423072
1.12882	0.901566	0.437362
1.1432	0.903197	0.428173
0.384187	0.378335	0.215461
1.12623	0.899867	0.412894
1.51228	0.824022	0.283347
1.55583	0.850377	0.248533
1.11856	0.876978	0.415587
1.18089	0.8993	0.450353
1.15376	0.89258	0.403886
1.15003	0.897866	0.414417
1.15348	0.89258	0.403886
1.15214	0.89649	0.39606
1.15145	0.893339	0.408991
1.13628	0.899852	0.454057
1.15483	0.873273	0.422497
1.56786	0.842926	0.231471
1.62561	0.85742	0.251816
1.54955	0.757974	0.242346
1.60105	0.786418	0.251089
0.930941	0.697501	0.251595
1.53385	0.835531	0.252473
1.14431	0.88756	0.444865
1.15957	0.879697	0.444334
1.53078	0.799953	0.268945
1.53067	0.813415	0.298363
1.11366	0.879942	0.434215
1.11514	0.879027	0.434215
1.02685	0.703028	0.273256
1.11311	0.952052	0.382088
1.11802	0.865064	0.385151
1.23876	0.906463	0.416799
1.17322	0.859817	0.441205
1.16535	0.848993	0.436972
1.14961	0.890598	0.420702
1.13005	0.884914	0.426225
1.21889	0.76578	0.253837
1.14204	0.90767	0.447383
1.20526	0.872447	0.403844
1.1428	0.921998	0.413318
1.4987	0.791085	0.274141
1.52263	0.778455	0.283714
1.52738	0.799248	0.29015
1.51136	0.799578	0.269761
1.56523	0.800883	0.306493
0.399049	0.385542	0.197602
1.18469	0.844986	0.398806
1.13051	0.87539	0.430259
0.415317	0.455933	0.207179
1.11455	0.930552	0.393453
1.00133	0.794128	0.306982
1.12942	0.845062	0.455077
1.49633	0.825033	0.261567
1.61464	0.833306	0.304607
1.15202	0.915956	0.434015
1.13422	0.891814	0.439454
1.16156	0.892667	0.434613
1.55106	0.798392	0.312108
1.13806	0.889482	0.443022
1.14192	0.891933	0.438527
1.13865	0.891933	0.510949
1.15188	0.706337	0.509105
1.15475	0.805999	0.516652
1.529	0.832943	0.308395
1.15139	0.889076	0.435105
1.14779	0.868738	0.439298
1.04283	0.944211	0.367305
1.57813	0.826368	0.324424
1.56519	0.827577	0.278529
1.54208	0.787174	0.259392
0.244038	0.302301	0.181398
0.157384	0.175667	0.126857
0.389811	0.507515	0.188852
1.09819	0.865583	0.428183
1.09434	0.874044	0.429357
1.10624	0.923182	0.386555
1.098	0.915639	0.377196
1.1037	0.939217	0.39754
0.307102	0.507728	0.136822
1.08389	0.94674	0.369719
1.46051	0.813468	0.276758
1.48262	0.833935	0.27736
1.09017	0.917584	0.378828
1.12577	0.945129	0.440515
1.10333	0.92802	0.347046
1.10499	0.935329	0.361239
1.10052	0.92802	0.347046
1.09923	0.926574	0.36657
1.10695	0.931524	0.356175
1.09658	0.962799	0.417573
1.09435	0.888836	0.406942
1.55291	0.845495	0.279052
1.6002	0.863591	0.276501
1.50042	0.780902	0.262162
1.53739	0.83388	0.255986
0.876594	0.739931	0.178431
1.53034	0.822624	0.25773
1.10166	0.942781	0.414217
1.11819	0.940708	0.421522
1.50372	0.858883	0.270554
1.52943	0.851178	0.299561
1.10364	0.916624	0.435553
1.10645	0.916983	0.435553
0.970321	0.748632	0.214156
1.07022	0.980872	0.386421
1.07112	0.905639	0.38622
1.14662	0.935821	0.416143
1.11764	0.881807	0.408891
1.10634	0.875337	0.41237
1.12164	0.938431	0.406539
1.09642	0.895583	0.355487
1.14799	0.831797	0.208632
1.11317	0.955386	0.416409
1.13022	0.921043	0.410282
1.10499	0.957125	0.419479
1.48337	0.825954	0.279477
1.50356	0.816473	0.28652
1.50814	0.833755	0.282239
1.50893	0.832313	0.280113
1.54673	0.829808	0.29324
0.269173	0.445546	0.191829
1.1353	0.863301	0.365653
1.1026	0.923018	0.412741
0.261089	0.364259	0.115866
1.09091	0.96575	0.388204
0.936482	0.795475	0.289832
1.10687	0.851119	0.442794
1.45451	0.863366	0.277969
1.5643	0.847287	0.294237
1.10358	0.966399	0.391746
1.09359	0.91338	0.42363
1.11651	0.925695	0.388245
1.57159	0.817751	0.271912
1.07461	0.912666	0.372949
1.09413	0.961628	0.413597
1.09168	0.961628	0.474548
1.11393	0.709695	0.494039
1.10934	0.868813	0.476711
1.52331	0.879836	0.283693
1.10007	0.911866	0.384884
1.09835	0.898709	0.388897
0.96996	1.00799	0.287344
1.51735	0.830576	0.331211
1.52281	0.830232	0.285842
1.5548	0.772038	0.323018
1.56719	0.782155	0.292307
1.56713	0.777124	0.232696
1.7141	0.855913	0.492222
1.71016	0.880326	0.49236
1.76095	0.902387	0.468974
1.75601	0.9044	0.465191
1.72454	0.943984	0.487021
1.53754	0.786616	0.274514
1.73244	0.951306	0.475822
0.812837	0.454657	0.149281
0.822034	0.445976	0.14051
1.70332	0.95122	0.475341
1.73533	1.00221	0.516321
1.68499	0.930397	0.435315
1.68492	0.944873	0.435141
1.68291	0.930397	0.435315
1.65545	0.937363	0.448418
1.69162	0.941293	0.429537
1.73912	0.983278	0.500992
1.73796	0.929492	0.457339
0.694377	0.386999	0.118555
0.735654	0.410698	0.115607
0.782048	0.439143	0.196047
0.800007	0.416733	0.139309
1.51417	0.767407	0.223702
0.784029	0.471044	0.162727
1.73251	0.920017	0.500344
1.71564	0.915779	0.500062
0.638566	0.396198	0.103405
0.636144	0.411858	0.129948
1.70673	0.924157	0.505296
1.70798	0.922396	0.505296
1.66519	0.73691	0.290765
1.72871	1.01603	0.442293
1.72679	0.929863	0.441514
1.72512	0.984753	0.473118
1.74302	0.892026	0.456078
1.72482	0.892282	0.447375
1.67862	0.965441	0.500432
1.7051	0.935545	0.469329
1.73401	0.848087	0.275654
1.71462	0.982742	0.493257
1.72523	0.944889	0.453594
1.71911	0.954273	0.492442
0.62002	0.35298	0.136995
0.70038	0.407763	0.094847
0.627806	0.352686	0.139772
0.627557	0.355658	0.126828
0.822325	0.510527	0.176723
1.61661	0.773934	0.271914
1.78827	0.925562	0.385804
1.69838	0.923347	0.507371
1.57874	0.78798	0.255044
1.73114	0.984877	0.456417
1.59649	0.768223	0.353075
1.71265	0.912982	0.538622
0.69293	0.45633	0.12957
0.735113	0.453862	0.123737
1.70675	0.968036	0.455732
1.6812	0.932953	0.504939
1.70898	0.929905	0.509619
0.689797	0.419366	0.103764
1.69768	0.930903	0.47827
1.77248	0.933218	0.460314
1.76906	0.933218	0.51507
1.75779	0.743219	0.565952
1.73961	0.879786	0.565761
0.705269	0.436784	0.144455
1.70063	0.927661	0.477247
1.70206	0.897364	0.481599
1.65118	1.03805	0.39619
0.657155	0.433402	0.204497
0.666748	0.430056	0.121396
0.260367	0.333305	0.203999
0.418282	0.493871	0.2353
1.08515	0.851386	0.492915
1.08099	0.857318	0.488815
1.0933	0.93981	0.405932
1.08499	0.947917	0.392157
1.08041	0.976118	0.430945
0.322884	0.455705	0.184466
1.05736	0.920813	0.407411
1.47998	0.824143	0.314688
1.51035	0.862233	0.317355
1.08675	0.947896	0.403489
1.10357	0.940436	0.460303
1.0899	0.956141	0.373575
1.08904	0.975271	0.378973
1.08824	0.956141	0.373575
1.08029	0.957586	0.37317
1.0903	0.972564	0.373853
1.08273	0.947775	0.459249
1.07999	0.927282	0.444731
1.53738	0.82189	0.330635
1.58136	0.820611	0.324314
1.49433	0.775765	0.311354
1.53836	0.801399	0.337295
0.901902	0.717522	0.226802
1.5251	0.829634	0.313434
1.07863	0.946284	0.434046
1.0963	0.942975	0.437634
1.51799	0.838287	0.333515
1.53337	0.825003	0.350769
1.0759	0.938669	0.450533
1.07757	0.936679	0.450533
0.977719	0.739762	0.269834
1.08385	0.997561	0.430638
1.08597	0.909896	0.43395
1.12862	0.946056	0.416691
1.11984	0.900489	0.436225
1.11341	0.898556	0.450736
1.10049	0.95111	0.422642
1.07773	0.939635	0.407825
1.14075	0.853884	0.255657
1.09987	0.959629	0.444442
1.10067	0.937888	0.411334
1.08895	0.965734	0.452925
1.47805	0.798674	0.33602
1.50066	0.808058	0.318281
1.49658	0.815708	0.351465
1.49565	0.807723	0.33528
1.50586	0.808847	0.348803
0.298019	0.447073	0.265261
1.12315	0.900096	0.37543
1.07573	0.939171	0.440468
0.307231	0.339682	0.171164
1.0841	0.997238	0.404516
0.966502	0.851647	0.328481
1.09691	0.876727	0.462374
1.46689	0.850319	0.301548
1.53548	0.827385	0.321276
1.08986	0.984157	0.438743
1.08065	0.958208	0.445505
1.10812	0.972649	0.409003
1.5376	0.813694	0.329505
1.0696	0.972295	0.417789
1.07662	0.93459	0.473232
1.07448	0.93459	0.537982
1.09991	0.733302	0.487622
1.09804	0.847633	0.546041
1.53291	0.847592	0.310068
1.09874	0.943777	0.415588
1.09613	0.929481	0.419709
0.997307	1.00778	0.339613
1.52384	0.832898	0.363616
1.52558	0.824525	0.32181
0.392898	0.527787	0.190384
1.09667	0.870351	0.462283
1.09282	0.87557	0.458281
1.09175	0.941269	0.394837
1.08584	0.932025	0.392229
1.08143	0.966127	0.401956
0.301018	0.520778	0.201217
1.08131	0.967624	0.387183
1.49398	0.833041	0.298257
1.49627	0.854116	0.30126
1.07003	0.937271	0.39284
1.12486	0.970921	0.462997
1.08752	0.936339	0.38101
1.08475	0.952974	0.385356
1.0853	0.936339	0.38101
1.08178	0.948753	0.391577
1.08534	0.939932	0.385927
1.09603	0.955139	0.414366
1.1069	0.904745	0.431232
1.55061	0.839153	0.309191
1.61803	0.85155	0.313146
1.51768	0.793467	0.280933
1.56055	0.826498	0.296939
0.882644	0.748321	0.203729
1.53264	0.847744	0.283818
1.07736	0.954838	0.411082
1.09499	0.950639	0.422218
1.52963	0.864507	0.284486
1.53905	0.853704	0.288502
1.07571	0.924278	0.454727
1.07846	0.923239	0.454727
0.968126	0.785363	0.199802
1.08248	0.988545	0.392427
1.08337	0.907954	0.397963
1.13931	0.942519	0.41592
1.11684	0.893497	0.437548
1.11148	0.889606	0.445922
1.09529	0.939848	0.426813
1.0917	0.912466	0.388341
1.15446	0.865344	0.217937
1.101	0.980899	0.419158
1.12697	0.942693	0.441249
1.09819	0.958151	0.443008
1.51452	0.820788	0.294714
1.51858	0.816743	0.271385
1.54512	0.830491	0.292236
1.53805	0.821525	0.301396
1.56032	0.832428	0.298227
0.272714	0.44315	0.233108
1.13418	0.88097	0.395188
1.07574	0.933661	0.430633
0.246764	0.371299	0.175517
1.07385	0.964416	0.396569
0.942328	0.811857	0.317535
1.09745	0.880812	0.465529
1.47874	0.871449	0.291753
1.56539	0.857268	0.286012
1.11149	0.975749	0.404689
1.09038	0.939618	0.404372
1.098	0.95614	0.40323
1.57632	0.840226	0.275182
1.07048	0.94088	0.402072
1.09559	0.95293	0.464747
1.09326	0.95293	0.540451
1.10578	0.738675	0.50419
1.10194	0.863662	0.516902
1.54024	0.899094	0.273779
1.09419	0.895536	0.403315
1.09198	0.888597	0.399428
0.976665	0.979372	0.327636
1.51543	0.833244	0.320151
1.54104	0.841068	0.279341
1.08617	0.809026	0.466211
1.08169	0.818981	0.468908
1.07862	0.891622	0.441503
1.0706	0.893544	0.451072
1.08022	0.893047	0.434481
0.38971	0.398538	0.198559
1.0629	0.883271	0.433254
1.52016	0.791588	0.231752
1.53062	0.806564	0.220987
1.07142	0.881222	0.423847
1.14306	0.904768	0.473777
1.08174	0.888975	0.401399
1.08264	0.887541	0.418275
1.08336	0.888975	0.401399
1.08556	0.88658	0.39781
1.0835	0.889354	0.412812
1.06489	0.910338	0.454702
1.10194	0.900161	0.418809
1.52212	0.82728	0.229847
1.57917	0.824481	0.250856
1.49635	0.751307	0.23285
1.53649	0.745519	0.234289
0.879983	0.676375	0.208974
1.54833	0.79118	0.211988
1.08138	0.88512	0.453155
1.08966	0.882517	0.452669
1.52446	0.791649	0.246898
1.5164	0.807588	0.263251
1.06097	0.885294	0.448379
1.06391	0.887949	0.448379
0.993584	0.687258	0.239451
1.0847	0.938702	0.411204
1.08431	0.85895	0.408755
1.17522	0.908505	0.462485
1.11176	0.829835	0.414195
1.10488	0.822233	0.427463
1.10428	0.917669	0.43229
1.06635	0.886471	0.428869
1.11916	0.779237	0.215087
1.07864	0.91381	0.464828
1.15921	0.870593	0.436841
1.09214	0.918105	0.415362
1.47358	0.780701	0.280415
1.46687	0.762567	0.276728
1.50141	0.783823	0.29652
1.48675	0.79088	0.275769
1.57535	0.779414	0.263293
0.404758	0.41528	0.204371
1.14627	0.843688	0.363643
1.07079	0.883026	0.446791
0.422755	0.493351	0.160738
1.07315	0.944769	0.41275
0.983145	0.792969	0.337932
1.09686	0.817095	0.47856
1.46114	0.781888	0.244914
1.56984	0.804402	0.261449
1.10929	0.921182	0.44099
1.07814	0.911407	0.470775
1.08282	0.901349	0.452038
1.56009	0.769408	0.29206
1.08194	0.885674	0.437244
1.09834	0.894558	0.449217
1.09543	0.894558	0.518301
1.11718	0.703346	0.503161
1.10626	0.803322	0.501171
1.51595	0.813691	0.270714
1.09042	0.873413	0.434696
1.08285	0.876159	0.430691
0.989263	0.955886	0.350968
1.50146	0.803273	0.321011
1.53534	0.810946	0.269833
0.00852	0.001874	0.008553
0.472561	0.452483	0.283741
0.486031	0.44407	0.290811
0.512779	0.480869	0.28916
1.10123	0.81046	0.418702
0.455531	0.408902	0.265965
1.50273	0.862487	0.476431
1.48321	0.854637	0.465809
0.457528	0.435074	0.275809
0.556828	0.415615	0.247569
0.494071	0.449896	0.27362
0.491156	0.450831	0.275188
0.494028	0.449896	0.27362
0.440423	0.443264	0.253176
0.49274	0.450968	0.274548
0.447685	0.418835	0.223848
0.369122	0.194632	0.16609
1.61897	0.882172	0.489703
1.61822	0.877005	0.516726
1.50916	0.83755	0.460625
1.54131	0.848242	0.485702
1.03913	0.761039	0.453457
1.53903	0.854244	0.511586
0.508477	0.435852	0.277783
0.504671	0.436048	0.28535
1.59087	0.848806	0.476007
1.54691	0.87996	0.497968
0.54849	0.462265	0.263343
0.549034	0.461531	0.263343
1.15227	0.785242	0.461413
0.325668	0.241181	0.192234
0.32351	0.185259	0.186497
0.557964	0.399849	0.23798
0.420015	0.229242	0.239092
0.414094	0.224309	0.235064
0.48527	0.449421	0.265127
0.468595	0.420505	0.27491
1.25128	0.90502	0.442424
0.489164	0.44921	0.25678
0.573944	0.393468	0.24069
0.487383	0.459486	0.259219
1.55594	0.873593	0.488997
1.52045	0.855365	0.480526
1.5824	0.865784	0.505809
1.55613	0.870237	0.484997
1.5371	0.904981	0.467907
1.09326	0.763907	0.446147
0.785034	0.636925	0.409345
0.551812	0.464674	0.262032
1.08124	0.821831	0.408687
0.501396	0.510133	0.267943
0.715668	0.558965	0.362349
0.381101	0.289294	0.243637
1.60234	0.873077	0.48516
1.63283	0.88794	0.469165
0.511296	0.470905	0.261285
0.506045	0.450508	0.267653
0.507381	0.446024	0.269212
1.60598	0.853534	0.497755
0.435849	0.437166	0.286482
0.345558	0.210195	0.221956
0.347251	0.210195	0.28681
0.503939	0.329841	0.388935
0.161202	0.092692	0.106451
1.58057	0.869253	0.475691
0.505718	0.443307	0.251471
0.487452	0.430051	0.255035
0.775199	0.692306	0.32693
1.55768	0.910044	0.508637
1.57164	0.887452	0.48778
0.473947	0.461199	0.275996
0.486116	0.453591	0.283035
0.51041	0.48759	0.295045
1.09733	0.824478	0.419264
0.452771	0.412556	0.263119
1.50324	0.874225	0.4723
1.48529	0.867819	0.46427
0.456928	0.447193	0.276543
0.557134	0.423151	0.243489
0.494063	0.456575	0.279328
0.490867	0.458866	0.280934
0.49402	0.456575	0.279328
0.437423	0.451132	0.258688
0.492448	0.459042	0.28028
0.445513	0.421463	0.227861
0.366634	0.199239	0.16296
1.61965	0.892587	0.484267
1.61961	0.892043	0.51687
1.50977	0.849952	0.46195
1.54198	0.860974	0.487094
1.03828	0.776487	0.449311
1.54115	0.871376	0.507387
0.50961	0.4497	0.283372
0.505787	0.448761	0.290985
1.59272	0.870654	0.467964
1.54774	0.896833	0.498108
0.547732	0.475756	0.255684
0.548275	0.475015	0.255684
1.14973	0.794752	0.457387
0.322537	0.242425	0.185237
0.32205	0.186082	0.179626
0.557326	0.412928	0.238602
0.419514	0.232746	0.232242
0.414538	0.227515	0.228226
0.482363	0.460648	0.26582
0.469251	0.435509	0.272162
1.24863	0.921429	0.442548
0.487756	0.460951	0.262422
0.571886	0.402084	0.239083
0.48539	0.472878	0.262534
1.55659	0.892591	0.494722
1.52034	0.871963	0.480662
1.58307	0.884969	0.506768
[truncated: 2,372 more rows]
