# Supplementary material for: Emergence of Dip2-mediated specific DAG-based PKC signalling axis in eukaryotes
Source: eLife journal article supplement (doi:10.7554/elife.104011), 2025-01-09
Supplement: fig5-figsupp2-data1 [file Figure 5. figure supplement 2B.xlsx]

## Sheet: GAPDH_33seq_MAFFT_DM
	Allomyces_macrogynus/1-192	Alternaria_alternata/1-193	Aspergillus_fumigatus/1-200	Batrachochytrium_dendrobatidiS/1-193	Bipolaris_maydis/1-193	Botrytis_cinerea/1-192	Candida_albicans/1-198	Coccidioides_immitis/1-193	Coemansia_reversa/1-222	Conidiobolus_coronatus/1-203	Cucurbitaria_berberidis/1-200	Eremothecium_cymbalariae/1-207	Fusarium_oxysporum/1-195	Histoplasma_capsulatum/1-192	Linderina_pennispora/1-195	Neolecta_irregularis/1-192	Neurospora_crassa/1-195	Penicillium_chrysogenum/1-198	Phycomyces_blakesleeanus/1-195	Pichia_kudriavzevii/1-197	Pneumocystis_jirovecii/1-212	Podila_verticillata/1-196	Pyricularia_oryzae/1-193	Rhizophagus_irregularis/1-194	Rhizopus_arrhizus/1-193	Rhizopus_stolonifer/1-197	Saccharomyces_cerevisiae/1-209	Saitoella_complicata/1-208	Schizosaccharomyces_pombe/1-202	Spizellomyces_punctatus/1-196	Sporothrix_schenckii/1-196	Trichoderma_harzianum/1-195	Yarrowia_lipolytica/1-203
Allomyces_macrogynus/1-192
Alternaria_alternata/1-193	0.23206
Aspergillus_fumigatus/1-200	0.24921	0.07431
Batrachochytrium_dendrobatidiS/1-193	0.30418	0.23058	0.20965
Bipolaris_maydis/1-193	0.22561	0.00526	0.08013	0.23711
Botrytis_cinerea/1-192	0.23864	0.0976	0.11118	0.22087	0.09178
Candida_albicans/1-198	0.34703	0.28961	0.26749	0.33775	0.28285	0.23929
Coccidioides_immitis/1-193	0.25165	0.10278	0.0676	0.24888	0.10865	0.14732	0.28813
Coemansia_reversa/1-222	0.86644	0.89884	0.8756	0.84052	0.8898	0.88511	0.82601	0.88592
Conidiobolus_coronatus/1-203	0.63326	0.65155	0.58213	0.69962	0.65206	0.66601	0.67153	0.61723	1.14501
Cucurbitaria_berberidis/1-200	0.63057	0.61378	0.56881	0.69823	0.60564	0.63118	0.64047	0.58802	1.00086	0.78675
Eremothecium_cymbalariae/1-207	0.43631	0.35614	0.3314	0.41879	0.36322	0.30885	0.27592	0.36484	0.78957	0.69695	0.71096
Fusarium_oxysporum/1-195	0.22416	0.08388	0.10267	0.23827	0.07821	0.12202	0.26399	0.13311	0.87629	0.65953	0.61388	0.37926
Histoplasma_capsulatum/1-192	0.25145	0.09606	0.06032	0.22784	0.10185	0.14018	0.2828	0.07246	0.86663	0.61099	0.60263	0.34914	0.11997
Linderina_pennispora/1-195	0.24687	0.2085	0.19942	0.26374	0.21491	0.20759	0.25894	0.21374	0.83194	0.70198	0.58791	0.36325	0.22838	0.19282
Neolecta_irregularis/1-192	0.28638	0.19649	0.19837	0.27869	0.20288	0.2213	0.2992	0.23014	0.76968	0.66506	0.61449	0.4022	0.20237	0.21803	0.27669
Neurospora_crassa/1-195	0.30211	0.19386	0.1605	0.281	0.2002	0.22376	0.30031	0.17415	0.83853	0.66005	0.66316	0.40842	0.17339	0.18795	0.24076	0.24368
Penicillium_chrysogenum/1-198	0.27168	0.13045	0.10537	0.23556	0.12442	0.14397	0.29497	0.13643	0.83569	0.65919	0.60883	0.39153	0.11441	0.12855	0.25163	0.21994	0.21032
Phycomyces_blakesleeanus/1-195	0.6291	0.6577	0.64404	0.71645	0.66625	0.67302	0.70616	0.66072	0.97044	0.7993	0.92269	0.73872	0.63223	0.66337	0.62466	0.60899	0.66291	0.65583
Pichia_kudriavzevii/1-197	0.35252	0.32062	0.27928	0.33841	0.31389	0.27163	0.22701	0.33708	0.76031	0.66387	0.74291	0.34148	0.30103	0.30684	0.3154	0.34626	0.37235	0.31007	0.64168
Pneumocystis_jirovecii/1-212	0.38787	0.32903	0.32344	0.39363	0.32208	0.3269	0.40944	0.34161	0.86653	0.83137	0.7741	0.56409	0.33771	0.35407	0.36845	0.33826	0.38793	0.35184	0.76204	0.44904
Podila_verticillata/1-196	0.25896	0.25099	0.25569	0.3597	0.25744	0.24502	0.31498	0.22827	0.91856	0.65951	0.62883	0.41801	0.23022	0.25266	0.27749	0.32642	0.29577	0.27401	0.69265	0.40183	0.42064
Pyricularia_oryzae/1-193	0.22803	0.08424	0.09795	0.22564	0.08998	0.14112	0.27619	0.10233	0.84374	0.66022	0.58899	0.36472	0.06026	0.12225	0.21918	0.20165	0.1669	0.12382	0.65589	0.30634	0.31822	0.20864
Rhizophagus_irregularis/1-194	0.23087	0.13188	0.14713	0.234	0.12601	0.13782	0.26216	0.15629	0.85012	0.68558	0.58853	0.36217	0.11929	0.15244	0.19975	0.20523	0.19509	0.1699	0.67153	0.32761	0.33529	0.23713	0.13189
Rhizopus_arrhizus/1-193	0.19113	0.19378	0.17555	0.27477	0.18759	0.17843	0.24023	0.20054	0.87934	0.60222	0.58959	0.34247	0.16277	0.1761	0.20408	0.23526	0.23305	0.21571	0.70903	0.31573	0.39519	0.239	0.18109	0.16809
Rhizopus_stolonifer/1-197	0.23815	0.17656	0.18092	0.25572	0.18287	0.18857	0.27833	0.20196	0.86552	0.68582	0.62825	0.38716	0.17717	0.1855	0.23575	0.22663	0.27212	0.20657	0.67425	0.31803	0.36227	0.28765	0.18203	0.16996	0.17534
Saccharomyces_cerevisiae/1-209	0.35277	0.32518	0.29972	0.35566	0.33231	0.3009	0.23034	0.32294	0.7946	0.70642	0.68493	0.21808	0.32792	0.31829	0.29237	0.34627	0.33927	0.36182	0.6249	0.2776	0.48495	0.37032	0.30584	0.28632	0.29928	0.31472
Saitoella_complicata/1-208	0.24071	0.14009	0.15487	0.18582	0.13411	0.16366	0.26152	0.1913	0.77375	0.70222	0.61844	0.38373	0.13453	0.16822	0.21464	0.16874	0.2275	0.19024	0.64285	0.27323	0.31587	0.26263	0.14497	0.15706	0.17746	0.19137	0.31815
Schizosaccharomyces_pombe/1-202	0.22794	0.20151	0.19109	0.23609	0.19524	0.16814	0.2672	0.21278	0.83342	0.70257	0.66387	0.41076	0.20534	0.20643	0.16821	0.25438	0.23335	0.22499	0.6046	0.31623	0.3157	0.29798	0.19877	0.19636	0.22421	0.20078	0.35303	0.19184
Spizellomyces_punctatus/1-196	0.23707	0.17191	0.15864	0.18149	0.17825	0.17672	0.27204	0.18915	0.89715	0.67039	0.65094	0.38151	0.16244	0.17386	0.18507	0.23509	0.22275	0.20661	0.67985	0.33172	0.34667	0.28805	0.17473	0.17724	0.19087	0.19166	0.30519	0.1552	0.17652
Sporothrix_schenckii/1-196	0.23306	0.08981	0.08257	0.23274	0.08411	0.11553	0.25225	0.11857	0.88184	0.62673	0.5691	0.35671	0.04971	0.10615	0.20718	0.18845	0.16593	0.13622	0.65979	0.29575	0.31803	0.24874	0.06689	0.12662	0.13435	0.19421	0.32954	0.12213	0.19753	0.1641
Trichoderma_harzianum/1-195	0.28406	0.18827	0.20226	0.26731	0.19459	0.18868	0.26465	0.20767	0.89484	0.69035	0.66406	0.35256	0.15645	0.21096	0.27202	0.25744	0.28036	0.2135	0.63935	0.34749	0.378	0.29793	0.15794	0.21677	0.23013	0.25252	0.32192	0.22865	0.26405	0.24338	0.17325
Yarrowia_lipolytica/1-203	0.29979	0.23123	0.22985	0.27533	0.23761	0.25157	0.27324	0.25774	0.87584	0.7416	0.6768	0.38427	0.25653	0.22942	0.25488	0.29285	0.29245	0.27881	0.65835	0.31541	0.41208	0.3576	0.23995	0.24144	0.24102	0.23373	0.31913	0.22399	0.24957	0.21408	0.24735	0.28772
	Correlation coefficient
		GAPDH
	PGK1	0.750806
	HSP60	0.732742
	CYTC	0.72802
	RPL5	0.674544
	STE20	0.551453
	TPI1	0.241519
	ACT	0.235157
	CDC42	0.232287
	RHO1	0.213496

## Sheet: Pgk1_Gapdh
	Allomyces_macrogynus/1-493	Alternaria_alternata/1-417	Aspergillus_fumigatus/1-417	Batrachochytrium_dendrobatidis/1-417	Bipolaris_maydis/1-417	Botrytis_cinerea/1-418	Candida_albicans/1-417	Coccidioides_posadasii/1-417	Coemansia_reversa/1-417	Conidiobolus_coronatus/1-420	Cucurbitaria_berberidis/1-417	Eremothecium_cymbalariae/1-416	Fusarium_graminearum/1-418	Histoplasma_capsulatum/1-418	Linderina_pennispora/1-419	Neolecta_irregularis/1-406	Neurospora_crassa/1-418	Penicillium_chrysogenum/1-417	Phycomyces_blakesleeanus/1-416	Pichia_kudriavzevii/1-416	Pneumocystis_jirovecii/1-417	Podila_verticillata/1-419	Pyricularia_oryzae/1-474	Rhizophagus_irregularis/1-442	Rhizopus_arrhizus/1-416	Rhizopus_stolonifer/1-416	Saccharomyces_cerevisiae/1-416	Saitoella_complicata/1-418	Schizosaccharomyces_pombe/1-414	Spizellomyces_punctatus/1-416	Sporothrix_schenckii/1-420	Trichoderma_harzianum/1-417	Yarrowia_lipolytica/1-426
Allomyces_macrogynus/1-493
Alternaria_alternata/1-417	0.43802
Aspergillus_fumigatus/1-417	0.43559	0.18497
Batrachochytrium_dendrobatidis/1-417	0.47636	0.54154	0.56404
Bipolaris_maydis/1-417	0.4254	0.03652	0.18467	0.52827
Botrytis_cinerea/1-418	0.44715	0.14435	0.1826	0.5601	0.14958
Candida_albicans/1-417	0.45044	0.36844	0.38614	0.58179	0.38675	0.33663
Coccidioides_posadasii/1-417	0.43703	0.24079	0.24483	0.55228	0.24267	0.24865	0.36871
Coemansia_reversa/1-417	0.46764	0.51424	0.50264	0.51419	0.49442	0.48625	0.45959	0.51692
Conidiobolus_coronatus/1-420	0.38773	0.36903	0.37421	0.4425	0.36223	0.36996	0.41254	0.40106	0.4343
Cucurbitaria_berberidis/1-417	0.43551	0.06946	0.18227	0.53964	0.06673	0.15579	0.3529	0.25267	0.48833	0.37094
Eremothecium_cymbalariae/1-416	0.49473	0.4964	0.49971	0.64461	0.48707	0.46639	0.34268	0.48194	0.54314	0.51797	0.48977
Fusarium_graminearum/1-418	0.42062	0.17353	0.23274	0.52448	0.16809	0.18795	0.33097	0.27031	0.45642	0.38218	0.1885	0.42835
Histoplasma_capsulatum/1-418	0.4371	0.25525	0.23368	0.59052	0.2458	0.2647	0.43438	0.28939	0.53925	0.42242	0.24565	0.47805	0.29129
Linderina_pennispora/1-419	0.48385	0.51737	0.49212	0.52153	0.49233	0.4602	0.45417	0.49206	0.17493	0.44183	0.47865	0.51265	0.44677	0.51721
Neolecta_irregularis/1-406	0.49755	0.34733	0.38941	0.48585	0.33622	0.36993	0.436	0.39969	0.52634	0.38953	0.33469	0.52763	0.38128	0.44487	0.50991
Neurospora_crassa/1-418	0.41181	0.24569	0.28031	0.53763	0.23868	0.2298	0.36281	0.30202	0.46097	0.40198	0.25265	0.49543	0.21513	0.3059	0.4347	0.42427
Penicillium_chrysogenum/1-417	0.43602	0.22405	0.15092	0.56951	0.22055	0.22606	0.38641	0.28308	0.4899	0.37646	0.22517	0.47045	0.243	0.26719	0.5038	0.39839	0.27683
Phycomyces_blakesleeanus/1-416	0.42949	0.40506	0.3829	0.48124	0.39191	0.39547	0.44067	0.42625	0.40706	0.33355	0.3907	0.53683	0.37829	0.45756	0.39844	0.41454	0.41881	0.40826
Pichia_kudriavzevii/1-416	0.4434	0.4267	0.43754	0.5551	0.43742	0.40492	0.30314	0.42263	0.50173	0.46734	0.41607	0.3877	0.38663	0.44574	0.45775	0.46137	0.41663	0.44088	0.4709
Pneumocystis_jirovecii/1-417	0.52711	0.41948	0.43702	0.54476	0.42203	0.41351	0.40101	0.39258	0.51777	0.45515	0.3867	0.49397	0.39542	0.4771	0.51538	0.44343	0.44313	0.47805	0.4659	0.40083
Podila_verticillata/1-419	0.44492	0.47627	0.48726	0.47341	0.47721	0.45236	0.56097	0.51139	0.47278	0.37882	0.46444	0.59483	0.47888	0.56316	0.4857	0.44048	0.46396	0.46996	0.4015	0.5461	0.57698
Pyricularia_oryzae/1-474	0.49245	0.22951	0.27657	0.48467	0.22908	0.1983	0.36012	0.27209	0.48259	0.40341	0.24516	0.46829	0.18315	0.29093	0.4659	0.42956	0.20299	0.28816	0.43192	0.40677	0.39023	0.48048
Rhizophagus_irregularis/1-442	0.44653	0.36379	0.37663	0.4384	0.34915	0.35751	0.44925	0.44122	0.48939	0.34705	0.33729	0.51883	0.34117	0.41331	0.46313	0.41996	0.41085	0.39976	0.33807	0.47482	0.47231	0.38179	0.3999
Rhizopus_arrhizus/1-416	0.42077	0.38109	0.34744	0.50842	0.366	0.36509	0.38568	0.38352	0.41791	0.35175	0.36253	0.48065	0.33469	0.39143	0.40784	0.3833	0.38244	0.39066	0.21674	0.41318	0.40635	0.45169	0.34122	0.38544
Rhizopus_stolonifer/1-416	0.46557	0.40144	0.38506	0.50978	0.38161	0.39487	0.39353	0.41551	0.40955	0.37144	0.38235	0.47741	0.36665	0.41644	0.39421	0.39987	0.40753	0.43219	0.23685	0.4468	0.41394	0.46169	0.36486	0.38982	0.10144
Saccharomyces_cerevisiae/1-416	0.45786	0.45587	0.4447	0.54039	0.45468	0.45429	0.30688	0.46167	0.49929	0.51229	0.44198	0.28825	0.36962	0.45559	0.50772	0.5175	0.43376	0.42607	0.47328	0.30629	0.41189	0.52034	0.42341	0.46506	0.43021	0.4559
Saitoella_complicata/1-418	0.40321	0.34413	0.33975	0.592	0.35747	0.33246	0.39144	0.39088	0.42563	0.44737	0.35861	0.4419	0.33072	0.41569	0.41657	0.43186	0.34534	0.37391	0.40998	0.41363	0.41516	0.48422	0.36183	0.46003	0.38513	0.3835	0.39526
Schizosaccharomyces_pombe/1-414	0.42223	0.33581	0.37447	0.50585	0.34949	0.34488	0.32744	0.35235	0.46234	0.35398	0.34138	0.46452	0.34452	0.40136	0.42647	0.4195	0.36765	0.3838	0.39336	0.35787	0.36299	0.50034	0.34163	0.42744	0.3273	0.34883	0.41989	0.35063
Spizellomyces_punctatus/1-416	0.41988	0.39585	0.41394	0.3014	0.38577	0.40154	0.45829	0.42537	0.45305	0.3213	0.38487	0.5395	0.37411	0.44311	0.44982	0.37871	0.37575	0.42274	0.37683	0.49896	0.48054	0.35931	0.40078	0.30829	0.40401	0.39488	0.47331	0.44981	0.39543
Sporothrix_schenckii/1-420	0.45051	0.32806	0.33133	0.57481	0.32151	0.32578	0.4208	0.36494	0.55745	0.4798	0.3212	0.49528	0.3109	0.36886	0.53896	0.47809	0.2964	0.36365	0.45021	0.45086	0.50235	0.52469	0.28367	0.44148	0.41652	0.45186	0.45869	0.46399	0.419	0.45375
Trichoderma_harzianum/1-417	0.38722	0.1926	0.24366	0.49623	0.19734	0.18968	0.34025	0.29394	0.42533	0.35338	0.20346	0.45213	0.14947	0.29242	0.44952	0.36025	0.21039	0.24781	0.37541	0.39519	0.39059	0.4486	0.16166	0.3505	0.34931	0.37632	0.39493	0.34401	0.3265	0.37192	0.29276
Yarrowia_lipolytica/1-426	0.45904	0.29076	0.29801	0.53358	0.29799	0.29095	0.30382	0.3303	0.44846	0.35561	0.29723	0.41076	0.28947	0.33065	0.43593	0.38311	0.31176	0.28857	0.35437	0.36485	0.40518	0.42637	0.34894	0.38224	0.32119	0.35071	0.39435	0.36612	0.3002	0.36878	0.39084	0.32613

## Sheet: Hsp60_Gapdh
	Allomyces_macrogynus/1-581	Alternaria_alternata/1-586	Aspergillus_fumigatus/1-587	Batrachochytrium_dendrobatidis/1-589	Bipolaris_maydis/1-586	Botrytis_cinerea/1-582	Candida_albicans/1-566	Coccidioides_immitis/1-594	Coemansia_reversa/1-579	Conidiobolus_coronatus/1-571	Cucurbitaria_berberidis/1-586	Eremothecium_cymbalariae/1-563	Fusarium_oxysporum/1-587	Histoplasma_capsulatum/1-590	Linderina_pennispora/1-576	Neolecta_irregularis/1-610	Neurospora_crassa/1-574	Penicillium_chrysogenum/1-588	Phycomyces_blakesleeanus/1-581	Pichia_kudriavzevii/1-571	Pneumocystis_jirovecii/1-591	Podila_verticillata/1-580	Pyricularia_oryzae/1-589	Rhizophagus_irregularis/1-591	Rhizopus_arrhizus/1-578	Rhizopus_stolonifer/1-578	Saccharomyces_cerevisiae/1-572	Saitoella_complicata/1-575	Schizosaccharomyces_pombe/1-582	Spizellomyces_punctatus/1-587	Sporothrix_schenckii/1-589	Trichoderma_harzianum/1-583	Yarrowia_lipolytica/1-574
Allomyces_macrogynus/1-581
Alternaria_alternata/1-586	0.3685
Aspergillus_fumigatus/1-587	0.36798	0.14426
Batrachochytrium_dendrobatidis/1-589	0.33317	0.39202	0.40922
Bipolaris_maydis/1-586	0.36101	0.02348	0.13862	0.38909
Botrytis_cinerea/1-582	0.33085	0.14097	0.14352	0.38951	0.14635
Candida_albicans/1-566	0.36895	0.28624	0.30092	0.43125	0.28634	0.2932
Coccidioides_immitis/1-594	0.35466	0.14369	0.10009	0.39326	0.15039	0.1412	0.29778
Coemansia_reversa/1-579	0.31726	0.30953	0.3028	0.37753	0.31508	0.31211	0.37453	0.29862
Conidiobolus_coronatus/1-571	0.31303	0.30076	0.30413	0.37826	0.29405	0.28733	0.35158	0.29478	0.29363
Cucurbitaria_berberidis/1-586	0.36859	0.03522	0.14454	0.40119	0.03879	0.14458	0.29305	0.15013	0.32272	0.2965
Eremothecium_cymbalariae/1-563	0.40467	0.31045	0.34459	0.44735	0.31356	0.3049	0.22043	0.3285	0.3962	0.38226	0.32638
Fusarium_oxysporum/1-587	0.36941	0.16895	0.15322	0.38931	0.17285	0.14381	0.29236	0.14707	0.31659	0.29347	0.17224	0.32539
Histoplasma_capsulatum/1-590	0.35362	0.14517	0.09639	0.40586	0.1375	0.12634	0.30131	0.0769	0.31153	0.30597	0.14084	0.33696	0.13858
Linderina_pennispora/1-576	0.32034	0.33546	0.32437	0.37023	0.32793	0.33297	0.34827	0.33978	0.13036	0.29681	0.33086	0.40298	0.34184	0.33906
Neolecta_irregularis/1-610	0.35936	0.26178	0.29299	0.42286	0.26196	0.26152	0.30707	0.27587	0.33987	0.3367	0.2673	0.33556	0.28304	0.28355	0.35264
Neurospora_crassa/1-574	0.35707	0.17075	0.15031	0.3907	0.17214	0.13608	0.28981	0.14431	0.31498	0.31322	0.1778	0.31654	0.12942	0.1478	0.33136	0.27527
Penicillium_chrysogenum/1-588	0.35358	0.15825	0.08222	0.38773	0.16172	0.15824	0.31722	0.11933	0.31659	0.29878	0.16906	0.36205	0.1818	0.1137	0.3367	0.30068	0.16942
Phycomyces_blakesleeanus/1-581	0.30737	0.30743	0.31768	0.34759	0.30401	0.28884	0.3664	0.29858	0.29297	0.24323	0.31363	0.3978	0.30868	0.30928	0.30638	0.33452	0.31423	0.30924
Pichia_kudriavzevii/1-571	0.39517	0.29778	0.29364	0.4107	0.2975	0.27897	0.1872	0.30106	0.38802	0.34326	0.29953	0.24143	0.28755	0.30285	0.36528	0.32537	0.28459	0.32265	0.33509
Pneumocystis_jirovecii/1-591	0.35446	0.33021	0.35505	0.41703	0.32871	0.32357	0.37379	0.33303	0.37654	0.3335	0.34839	0.38338	0.3481	0.34399	0.38369	0.32275	0.34729	0.36644	0.36258	0.37309
Podila_verticillata/1-580	0.36703	0.38164	0.36254	0.41786	0.38459	0.36026	0.42591	0.38442	0.35583	0.31944	0.38408	0.44871	0.38874	0.38566	0.35475	0.40203	0.37923	0.39838	0.32335	0.42579	0.42402
Pyricularia_oryzae/1-589	0.33261	0.17413	0.14483	0.38558	0.17748	0.14082	0.29135	0.16373	0.32928	0.31628	0.17988	0.30399	0.13631	0.14556	0.36094	0.27554	0.13935	0.17313	0.31214	0.29633	0.33462	0.40447
Rhizophagus_irregularis/1-591	0.31093	0.29778	0.30678	0.36272	0.30364	0.29225	0.36573	0.28852	0.28617	0.25455	0.31907	0.38855	0.32543	0.29785	0.30165	0.31202	0.31458	0.31415	0.24902	0.3461	0.34066	0.33498	0.32334
Rhizopus_arrhizus/1-578	0.29479	0.29912	0.29229	0.31434	0.29984	0.27723	0.36347	0.2814	0.29222	0.25273	0.31038	0.39045	0.31001	0.29119	0.29632	0.33397	0.31029	0.29868	0.11956	0.32931	0.36048	0.31301	0.29836	0.24995
Rhizopus_stolonifer/1-578	0.30524	0.33779	0.3245	0.33943	0.33286	0.31759	0.38289	0.31272	0.29675	0.24905	0.34535	0.40867	0.33917	0.31916	0.29734	0.35596	0.33113	0.3179	0.12197	0.34449	0.36641	0.32499	0.31732	0.26577	0.0676
Saccharomyces_cerevisiae/1-572	0.39625	0.32508	0.34075	0.41785	0.32324	0.32319	0.23539	0.33916	0.37836	0.38235	0.33633	0.17133	0.32448	0.34343	0.38558	0.35541	0.29754	0.32861	0.38459	0.23655	0.39705	0.42789	0.3182	0.37647	0.36864	0.39062
Saitoella_complicata/1-575	0.31232	0.25941	0.26895	0.32177	0.26305	0.24405	0.31746	0.25802	0.34301	0.28807	0.26722	0.33409	0.246	0.27007	0.31839	0.28173	0.25912	0.27674	0.28568	0.32032	0.28606	0.35277	0.24444	0.29955	0.28152	0.30471	0.34255
Schizosaccharomyces_pombe/1-582	0.44674	0.35298	0.34529	0.50142	0.35818	0.37256	0.40337	0.35516	0.40842	0.43082	0.35556	0.45197	0.33731	0.36152	0.40188	0.42458	0.33753	0.35034	0.42691	0.42538	0.41643	0.49615	0.3598	0.42238	0.43789	0.4431	0.41953	0.36753
Spizellomyces_punctatus/1-587	0.28069	0.3748	0.36723	0.21823	0.36957	0.34403	0.39788	0.34961	0.35393	0.31935	0.38396	0.42369	0.37614	0.36766	0.33468	0.38737	0.35018	0.35254	0.29566	0.41438	0.37557	0.3673	0.37943	0.32225	0.2967	0.30709	0.39853	0.31282	0.47028
Sporothrix_schenckii/1-589	0.39236	0.18346	0.17159	0.41004	0.18108	0.14475	0.29729	0.18367	0.34092	0.30775	0.18366	0.32588	0.12765	0.17188	0.34268	0.2894	0.14581	0.2123	0.33004	0.28141	0.34416	0.40525	0.13693	0.33226	0.32421	0.33363	0.33422	0.26134	0.35624	0.39366
Trichoderma_harzianum/1-583	0.3556	0.1462	0.15251	0.38475	0.15021	0.12956	0.29876	0.15215	0.32233	0.30025	0.15449	0.33143	0.11359	0.15244	0.33383	0.27303	0.1214	0.17658	0.3129	0.28563	0.34261	0.38509	0.11973	0.29865	0.30601	0.3301	0.33034	0.23822	0.33255	0.35354	0.13592
Yarrowia_lipolytica/1-574	0.31566	0.22957	0.23362	0.38269	0.22961	0.1919	0.20436	0.22367	0.31894	0.28713	0.23602	0.24339	0.22477	0.22686	0.32312	0.28071	0.21906	0.25511	0.31226	0.2123	0.29783	0.37453	0.22745	0.29839	0.30085	0.3314	0.2609	0.24243	0.3589	0.34493	0.24358	0.2251

## Sheet: Cytc_Gapdh
	Allomyces_macrogynus/1-301	Alternaria_alternata/1-336	Aspergillus_fumigatus/1-319	Batrachochytrium_dendrobatidis/1-267	Bipolaris_maydis/1-336	Botrytis_cinerea/1-323	Candida_albicans/1-288	Coccidioides_immitis/1-319	Coemansia_reversa/1-319	Conidiobolus_coronatus/1-289	Cucurbitaria_berberidis/1-337	Eremothecium_cymbalariae/1-297	Fusarium_oxysporum/1-322	Histoplasma_capsulatum/1-326	Linderina_pennispora/1-277	Neolecta_irregularis/1-310	Neurospora_crassa/1-321	Penicillium_chrysogenum/1-327	Phycomyces_blakesleeanus/1-239	Pichia_kudriavzevii/1-302	Pneumocystis_jirovecii/1-295	Podila_verticillata/1-308	Pyricularia_oryzae/1-324	Rhizophagus_irregularis/1-310	Rhizopus_arrhizus/1-303	Rhizopus_stolonifer/1-287	Saccharomyces_cerevisiae/1-309	Saitoella_complicata/1-307	Schizosaccharomyces_pombe/1-307	Spizellomyces_punctatus/1-350	Sporothrix_schenckii/1-314	Trichoderma_harzianum/1-318	Yarrowia_lipolytica/1-280
Allomyces_macrogynus/1-301
Alternaria_alternata/1-336	0.74485
Aspergillus_fumigatus/1-319	0.68665	0.34871
Batrachochytrium_dendrobatidis/1-267	0.58337	0.82631	0.81392
Bipolaris_maydis/1-336	0.72515	0.07163	0.3646	0.82026
Botrytis_cinerea/1-323	0.67833	0.31969	0.35071	0.75297	0.33394
Candida_albicans/1-288	0.61748	0.64799	0.57655	0.6995	0.62934	0.57302
Coccidioides_immitis/1-319	0.74308	0.35281	0.18531	0.78703	0.37308	0.35899	0.60913
Coemansia_reversa/1-319	0.61438	0.82008	0.75488	0.68796	0.83334	0.74342	0.71072	0.76473
Conidiobolus_coronatus/1-289	0.47793	0.68342	0.62591	0.61523	0.68892	0.63672	0.57443	0.63526	0.5957
Cucurbitaria_berberidis/1-337	0.742	0.08782	0.36519	0.84884	0.10639	0.34603	0.6556	0.37011	0.82607	0.67951
Eremothecium_cymbalariae/1-297	0.61564	0.69812	0.65357	0.7125	0.70389	0.62022	0.24684	0.66045	0.66374	0.58016	0.7077
Fusarium_oxysporum/1-322	0.74308	0.38179	0.40625	0.80577	0.38646	0.35386	0.62619	0.42662	0.78391	0.64339	0.39868	0.6631
Histoplasma_capsulatum/1-326	0.72342	0.36256	0.23561	0.76136	0.39655	0.36431	0.6069	0.15913	0.72683	0.65242	0.37116	0.65259	0.41313
Linderina_pennispora/1-277	0.49283	0.73616	0.63743	0.63676	0.74788	0.64062	0.60445	0.65715	0.16535	0.57253	0.73022	0.61684	0.69923	0.6414
Neolecta_irregularis/1-310	0.7183	0.70214	0.59903	0.85548	0.72247	0.5985	0.63669	0.63382	0.79271	0.5595	0.6917	0.69133	0.62613	0.63498	0.65547
Neurospora_crassa/1-321	0.68518	0.28171	0.35735	0.7945	0.29745	0.27216	0.61739	0.3407	0.79139	0.62222	0.30391	0.65884	0.24617	0.3403	0.69077	0.61129
Penicillium_chrysogenum/1-327	0.71556	0.35594	0.1757	0.79671	0.3845	0.36684	0.62469	0.2603	0.75616	0.64706	0.37549	0.67292	0.42316	0.29967	0.61463	0.63058	0.34523
Phycomyces_blakesleeanus/1-239	0.35455	0.57138	0.45898	0.58194	0.56799	0.49967	0.42582	0.49252	0.47243	0.31397	0.58816	0.41378	0.5575	0.46955	0.4551	0.48911	0.54758	0.48792
Pichia_kudriavzevii/1-302	0.62146	0.65532	0.58122	0.7304	0.64945	0.60538	0.25072	0.59505	0.71062	0.60677	0.64969	0.3033	0.62392	0.5881	0.642	0.68101	0.62249	0.60023	0.44268
Pneumocystis_jirovecii/1-295	0.61237	0.63537	0.58245	0.75177	0.65387	0.63172	0.54386	0.61046	0.63923	0.56479	0.65334	0.61911	0.62951	0.59748	0.55439	0.58829	0.63829	0.60583	0.39164	0.59541
Podila_verticillata/1-308	0.51799	0.65013	0.57339	0.67615	0.64508	0.59296	0.59573	0.58289	0.57061	0.41938	0.653	0.61676	0.69139	0.59243	0.52942	0.68171	0.64097	0.59987	0.28126	0.57236	0.60725
Pyricularia_oryzae/1-324	0.67003	0.34376	0.3901	0.79604	0.36504	0.33095	0.60618	0.38698	0.74859	0.61735	0.36333	0.64314	0.27871	0.35927	0.63985	0.60135	0.18753	0.39427	0.55021	0.63395	0.65957	0.6909
Rhizophagus_irregularis/1-310	0.55208	0.69801	0.6352	0.63476	0.71477	0.65648	0.57643	0.65829	0.4886	0.53995	0.72955	0.56786	0.72212	0.6392	0.48889	0.64977	0.68684	0.68248	0.31823	0.59875	0.5814	0.49464	0.6656
Rhizopus_arrhizus/1-303	0.51448	0.67817	0.60905	0.6381	0.68994	0.64243	0.59559	0.58575	0.5283	0.45047	0.69574	0.5323	0.67704	0.60728	0.46261	0.63197	0.63565	0.64225	0.15145	0.58516	0.56412	0.44535	0.6848	0.48379
Rhizopus_stolonifer/1-287	0.47105	0.6298	0.54565	0.61368	0.63501	0.57889	0.46824	0.56322	0.50051	0.34185	0.64141	0.45363	0.60981	0.54305	0.48395	0.5768	0.59674	0.57331	0.1351	0.4949	0.48017	0.36233	0.61362	0.40576	0.09184
Saccharomyces_cerevisiae/1-309	0.6067	0.70122	0.58755	0.70004	0.71108	0.64102	0.28255	0.59523	0.6756	0.57936	0.69842	0.1894	0.66271	0.61131	0.61627	0.68295	0.63884	0.60546	0.42621	0.2912	0.53687	0.56704	0.62739	0.5677	0.57697	0.48567
Saitoella_complicata/1-307	0.60361	0.57807	0.56066	0.69284	0.61381	0.53467	0.50332	0.59319	0.62796	0.48837	0.60957	0.51377	0.55427	0.63219	0.58461	0.61931	0.60532	0.61781	0.32885	0.52278	0.52313	0.51076	0.61485	0.53632	0.47303	0.41337	0.53486
Schizosaccharomyces_pombe/1-307	0.77098	0.7424	0.72481	0.83426	0.72036	0.71787	0.7047	0.77359	0.83588	0.71743	0.7361	0.8297	0.76918	0.7573	0.70021	0.71822	0.74082	0.76199	0.55543	0.77277	0.62177	0.81334	0.70425	0.79511	0.74703	0.67965	0.85383	0.65649
Spizellomyces_punctatus/1-350	0.56113	0.86853	0.85453	0.30285	0.8492	0.83677	0.72238	0.85261	0.73997	0.57609	0.9137	0.73646	0.83879	0.81141	0.62399	0.85866	0.81476	0.88634	0.453	0.73342	0.71617	0.65176	0.84514	0.65729	0.55851	0.54698	0.78036	0.70995	0.88645
Sporothrix_schenckii/1-314	0.69779	0.36922	0.37417	0.80768	0.38709	0.34933	0.58659	0.38573	0.78069	0.63208	0.41403	0.64648	0.29861	0.37516	0.6305	0.64472	0.22198	0.36729	0.51479	0.59125	0.62221	0.67526	0.20413	0.63806	0.62855	0.59184	0.65505	0.5892	0.75262	0.81785
Trichoderma_harzianum/1-318	0.6975	0.37508	0.43198	0.79858	0.3794	0.36369	0.64099	0.43968	0.75792	0.68069	0.38489	0.67011	0.1657	0.43306	0.70919	0.68749	0.25332	0.40584	0.55678	0.63643	0.66841	0.64659	0.27904	0.68059	0.65204	0.62211	0.67576	0.54235	0.7585	0.86676	0.29998
Yarrowia_lipolytica/1-280	0.56639	0.60287	0.52585	0.66951	0.59348	0.5689	0.37025	0.56347	0.63192	0.53382	0.61562	0.37143	0.59513	0.57299	0.56562	0.56439	0.56125	0.51466	0.39826	0.38788	0.48266	0.54856	0.60442	0.57179	0.49301	0.44986	0.38084	0.48458	0.63122	0.68661	0.54305	0.57636

## Sheet: Rpl5_Gapdh
	Allomyces_macrogynus/1-294	Alternaria_alternata/1-300	Aspergillus_fumigatus/1-300	Batrachochytrium_dendrobatidis/1-299	Bipolaris_maydis/1-301	Botrytis_cinerea/1-295	Candida_albicans/1-298	Coccidioides_immitis/1-300	Coemansia_reversa/1-293	Conidiobolus_coronatus/1-296	Cucurbitaria_berberidis/1-300	Eremothecium_cymbalariae/1-297	Fusarium_oxysporum/1-302	Histoplasma_capsulatum/1-299	Linderina_pennispora/1-293	Neolecta_irregularis/1-295	Neurospora_crassa/1-301	Penicillium_chrysogenum/1-300	Phycomyces_blakesleeanus/1-294	Pichia_kudriavzevii/1-294	Pneumocystis_jirovecii/1-292	Podila_verticillata/1-299	Pyricularia_oryzae/1-302	Rhizophagus_irregularis/1-297	Rhizopus_arrhizus/1-292	Rhizopus_stolonifer/1-126	Saccharomyces_cerevisiae/1-297	Saitoella_complicata/1-298	Schizosaccharomyces_pombe/1-294	Spizellomyces_punctatus/1-301	Sporothrix_schenckii/1-316	Trichoderma_harzianum/1-300	Yarrowia_lipolytica/1-296
Allomyces_macrogynus/1-294
Alternaria_alternata/1-300	0.61331
Aspergillus_fumigatus/1-300	0.58082	0.28518
Batrachochytrium_dendrobatidis/1-299	0.48752	0.6803	0.59417
Bipolaris_maydis/1-301	0.60842	0.08203	0.28351	0.66859
Botrytis_cinerea/1-295	0.62461	0.20725	0.23784	0.64728	0.21956
Candida_albicans/1-298	0.65814	0.4821	0.43603	0.70284	0.48709	0.49776
Coccidioides_immitis/1-300	0.62882	0.30196	0.19345	0.679	0.28612	0.25262	0.45811
Coemansia_reversa/1-293	0.38797	0.5963	0.54091	0.54619	0.58503	0.60615	0.59544	0.59984
Conidiobolus_coronatus/1-296	0.4204	0.56499	0.46575	0.4895	0.56378	0.53212	0.59704	0.53731	0.4085
Cucurbitaria_berberidis/1-300	0.58774	0.08243	0.3035	0.68309	0.10471	0.2168	0.48621	0.30922	0.57772	0.56423
Eremothecium_cymbalariae/1-297	0.61921	0.46521	0.38305	0.63156	0.45195	0.45357	0.26021	0.41955	0.5745	0.5852	0.47296
Fusarium_oxysporum/1-302	0.61717	0.25597	0.24227	0.71235	0.25034	0.21113	0.51373	0.26256	0.62704	0.58574	0.28483	0.45603
Histoplasma_capsulatum/1-299	0.63872	0.28361	0.17702	0.66601	0.26206	0.25294	0.44059	0.1444	0.58355	0.56205	0.29158	0.42197	0.22615
Linderina_pennispora/1-293	0.34876	0.57439	0.50124	0.52406	0.56173	0.56542	0.57766	0.57264	0.19493	0.31683	0.55572	0.55995	0.59498	0.54754
Neolecta_irregularis/1-295	0.55739	0.50012	0.45944	0.5591	0.48923	0.47442	0.47053	0.51167	0.49927	0.54047	0.4885	0.48557	0.50564	0.45589	0.48987
Neurospora_crassa/1-301	0.57068	0.27288	0.18577	0.653	0.2578	0.20044	0.46581	0.24746	0.57297	0.51388	0.27578	0.40717	0.18541	0.2295	0.54095	0.45095
Penicillium_chrysogenum/1-300	0.58137	0.36134	0.16668	0.59879	0.33623	0.33703	0.51829	0.28308	0.55739	0.47153	0.36283	0.4898	0.35744	0.2416	0.51362	0.52511	0.24616
Phycomyces_blakesleeanus/1-294	0.42014	0.58256	0.54933	0.52167	0.56696	0.61637	0.59417	0.5595	0.37646	0.44617	0.57985	0.54144	0.63578	0.58501	0.37208	0.51461	0.5569	0.57519
Pichia_kudriavzevii/1-294	0.61256	0.4256	0.39545	0.63073	0.42935	0.44566	0.28631	0.41315	0.53143	0.57942	0.45362	0.23339	0.45583	0.4118	0.55586	0.45365	0.42268	0.49063	0.57816
Pneumocystis_jirovecii/1-292	0.52691	0.53598	0.4714	0.57553	0.53444	0.53502	0.59885	0.51347	0.56351	0.49825	0.52997	0.53867	0.52885	0.46371	0.51927	0.37988	0.52792	0.52872	0.49878	0.51157
Podila_verticillata/1-299	0.37886	0.57308	0.49847	0.52638	0.55112	0.56725	0.61592	0.53848	0.41255	0.38821	0.54667	0.56204	0.60939	0.52426	0.36159	0.48002	0.51455	0.52369	0.35134	0.63342	0.43894
Pyricularia_oryzae/1-302	0.61049	0.2795	0.2218	0.66407	0.2689	0.19565	0.47573	0.20275	0.59012	0.55345	0.28997	0.44104	0.20211	0.20236	0.58171	0.48054	0.18227	0.32004	0.59175	0.43023	0.54204	0.56687
Rhizophagus_irregularis/1-297	0.42703	0.63218	0.56039	0.54155	0.60668	0.62435	0.64965	0.64015	0.38169	0.3954	0.62396	0.63412	0.66543	0.59927	0.35752	0.52259	0.58596	0.59492	0.44178	0.61342	0.51111	0.33337	0.61279
Rhizopus_arrhizus/1-292	0.44824	0.57648	0.57415	0.51193	0.58299	0.63319	0.62835	0.57547	0.39175	0.42706	0.6041	0.58172	0.66851	0.63576	0.36622	0.56737	0.59844	0.61488	0.17733	0.58342	0.52494	0.36577	0.62233	0.4357
Rhizopus_stolonifer/1-126	0.20114	0.36184	0.34894	0.23371	0.36511	0.46745	0.48421	0.37288	0.17629	0.27037	0.36738	0.38201	0.44593	0.38376	0.16614	0.27231	0.43608	0.36756	0.06814	0.39939	0.203	0.14385	0.47045	0.16482	0.03355
Saccharomyces_cerevisiae/1-297	0.5995	0.49531	0.41028	0.6275	0.47046	0.48493	0.25875	0.48272	0.55232	0.60277	0.4925	0.16221	0.46707	0.45064	0.54203	0.48076	0.41492	0.50353	0.54369	0.27978	0.5883	0.59637	0.46747	0.66496	0.59673	0.40781
Saitoella_complicata/1-298	0.59182	0.43421	0.4087	0.60532	0.44244	0.45165	0.4623	0.42689	0.5107	0.60583	0.4374	0.44105	0.45667	0.41361	0.47611	0.36125	0.42909	0.44607	0.51687	0.41733	0.43933	0.53921	0.43992	0.57653	0.55416	0.28757	0.45819
Schizosaccharomyces_pombe/1-294	0.63561	0.52902	0.4751	0.61889	0.54258	0.51199	0.52995	0.49118	0.56975	0.57903	0.53994	0.47335	0.54833	0.49126	0.51157	0.444	0.4894	0.52979	0.51642	0.46161	0.45441	0.57061	0.49114	0.59054	0.55701	0.39022	0.52071	0.46299
Spizellomyces_punctatus/1-301	0.39062	0.62307	0.52846	0.31538	0.61545	0.56015	0.62328	0.57834	0.46385	0.46534	0.60651	0.58883	0.62465	0.58174	0.43231	0.57571	0.57582	0.56067	0.46189	0.58043	0.56284	0.49633	0.59908	0.53509	0.47789	0.16421	0.62163	0.58215	0.6576
Sporothrix_schenckii/1-316	0.61618	0.33672	0.26766	0.65704	0.32508	0.2504	0.50496	0.30313	0.5608	0.55664	0.3385	0.49717	0.24169	0.27002	0.59414	0.50718	0.22555	0.31457	0.55759	0.50166	0.55042	0.55197	0.22914	0.60587	0.6101	0.44878	0.47398	0.50405	0.53435	0.61354
Trichoderma_harzianum/1-300	0.62382	0.23613	0.25558	0.66224	0.22127	0.20686	0.50027	0.26011	0.56641	0.50499	0.23298	0.46135	0.20034	0.27698	0.55923	0.48205	0.19908	0.31555	0.54478	0.43025	0.52865	0.54811	0.23773	0.60604	0.57835	0.39056	0.46529	0.43198	0.53843	0.56739	0.31611
Yarrowia_lipolytica/1-296	0.62474	0.44656	0.43733	0.7752	0.44249	0.46648	0.26541	0.46117	0.62879	0.60916	0.45554	0.28489	0.4531	0.42498	0.59613	0.53326	0.44903	0.50646	0.60353	0.2916	0.59927	0.62374	0.44895	0.68427	0.68167	0.4401	0.27627	0.49422	0.55172	0.66955	0.4963	0.48327

## Sheet: Ste20_Gapdh
	Allomyces_macrogynus/24-685	Alternaria_alternata/168-820	Aspergillus_fumigatus/196-815	Batrachochytrium_dendrobatidis/151-781	Bipolaris_maydis/286-960	Botrytis_cinerea/220-856	Candida_albicans/431-1230	Coccidioides_immitis/196-867	Coemansia_reversa/70-649	Conidiobolus_coronatus/120-663	Cucurbitaria_berberidis/200-852	Eremothecium_cymbalariae/493-1118	Fusarium_oxysporum/233-843	Histoplasma_capsulatum/215-904	Linderina_pennispora/150-871	Neolecta_irregularis/48-530	Neurospora_crassa/47-692	Penicillium_chrysogenum/201-820	Phycomyces_blakesleeanus/45-552	Pichia_kudriavzevii/382-1232	Pneumocystis_jirovecii/148-693	Podila_verticillata/344-903	Pyricularia_oryzae/167-869	Rhizophagus_irregularis/158-720	Rhizopus_arrhizus/132-655	Rhizopus_stolonifer/127-635	Saccharomyces_cerevisiae/287-902	Saitoella_complicata/141-699	Schizosaccharomyces_pombe/99-658	Spizellomyces_punctatus/192-795	Sporothrix_schenckii/356-1040	Trichoderma_harzianum/185-808	Yarrowia_lipolytica/341-1125
Allomyces_macrogynus/24-685
Alternaria_alternata/168-820	0.87081
Aspergillus_fumigatus/196-815	0.86259	0.52592
Batrachochytrium_dendrobatidis/151-781	0.90102	0.88251	0.84303
Bipolaris_maydis/286-960	0.85465	0.10976	0.51184	0.86021
Botrytis_cinerea/220-856	0.83771	0.50092	0.43221	0.87538	0.50013
Candida_albicans/431-1230	0.97943	0.93258	0.91693	0.94639	0.94585	0.92228
Coccidioides_immitis/196-867	0.9006	0.54856	0.29576	0.87536	0.56649	0.47786	1.00242
Coemansia_reversa/70-649	0.94794	1.03856	1.05925	1.03235	1.06195	1.03029	1.1062	1.06456
Conidiobolus_coronatus/120-663	1.0399	0.96025	0.94418	0.9922	0.96986	0.98531	1.03707	0.90923	1.09938
Cucurbitaria_berberidis/200-852	0.87609	0.14904	0.48638	0.85006	0.14634	0.47316	0.93567	0.50737	1.05381	0.93788
Eremothecium_cymbalariae/493-1118	0.99521	0.78278	0.7983	1.02469	0.78169	0.80719	0.72775	0.86218	1.03923	0.91935	0.79306
Fusarium_oxysporum/233-843	0.89446	0.59504	0.50508	0.92768	0.5948	0.3374	0.94971	0.51513	1.04416	0.9382	0.58536	0.81747
Histoplasma_capsulatum/215-904	0.92845	0.55663	0.32081	0.90212	0.56103	0.48908	1.04436	0.31991	1.11368	0.94885	0.5293	0.86978	0.54264
Linderina_pennispora/150-871	0.96274	0.86604	0.83603	0.88079	0.89039	0.95799	1.07974	0.89484	1.17931	1.05432	0.84485	1.02507	0.94382	0.92467
Neolecta_irregularis/48-530	0.66639	0.56362	0.56191	0.62558	0.57262	0.57022	0.67061	0.55664	0.85385	0.82983	0.55358	0.62733	0.59043	0.57788	0.5639
Neurospora_crassa/47-692	0.86319	0.5653	0.47402	0.87863	0.58579	0.36796	0.93106	0.50772	1.05834	0.95404	0.56631	0.82937	0.25676	0.53241	0.93213	0.56269
Penicillium_chrysogenum/201-820	0.84094	0.55249	0.23191	0.81329	0.54663	0.46981	0.92301	0.32339	1.02571	0.94557	0.53518	0.83808	0.52708	0.39665	0.85423	0.57322	0.51724
Phycomyces_blakesleeanus/45-552	0.78063	0.74534	0.71554	0.75342	0.72216	0.72465	0.79133	0.72618	0.95514	0.90087	0.72032	0.74972	0.75665	0.69573	0.76444	0.56992	0.71319	0.7465
Pichia_kudriavzevii/382-1232	1.10489	1.01451	1.02092	1.19458	0.99992	1.05744	1.06638	1.07773	1.19477	1.11375	1.01366	0.87566	1.09611	1.14283	1.11495	0.86376	1.1326	1.04803	0.93967
Pneumocystis_jirovecii/148-693	0.96261	0.85677	0.798	0.86754	0.86673	0.82117	0.99477	0.85175	1.00298	1.03157	0.87709	0.92553	0.88017	0.88712	0.92742	0.59413	0.85293	0.84818	0.8072	1.12365
Podila_verticillata/344-903	0.77963	0.72827	0.72084	0.68709	0.73391	0.71884	0.83927	0.75416	0.9293	0.95353	0.72477	0.81406	0.78004	0.75013	0.70663	0.53141	0.71836	0.76583	0.64492	0.98243	0.80477
Pyricularia_oryzae/167-869	1.05527	1.09437	1.10495	1.151	1.10605	1.09033	1.19506	1.10621	0.67907	1.20628	1.11193	1.18748	1.10261	1.19706	1.16264	0.89349	1.1405	1.10689	0.96568	1.35231	1.13068	0.99157
Rhizophagus_irregularis/158-720	0.8458	0.72804	0.71229	0.79327	0.71774	0.70899	0.85805	0.69484	0.98596	1.01665	0.69555	0.81591	0.76944	0.69009	0.79408	0.53101	0.74495	0.76093	0.73754	1.03518	0.77395	0.62242	1.05206
Rhizopus_arrhizus/132-655	0.76196	0.67299	0.6934	0.76766	0.66607	0.67924	0.82518	0.70086	0.88276	0.89946	0.67936	0.76337	0.74239	0.72338	0.6658	0.56107	0.69715	0.69757	0.49739	1.04193	0.78114	0.60972	0.87523	0.6928
Rhizopus_stolonifer/127-635	0.68409	0.66268	0.67937	0.72555	0.64192	0.62654	0.81766	0.68401	0.84562	0.8254	0.64702	0.7481	0.70765	0.70128	0.68037	0.56123	0.68288	0.67581	0.45675	0.98705	0.76162	0.58963	0.8768	0.62745	0.12526
Saccharomyces_cerevisiae/287-902	0.94582	0.76855	0.82039	0.9702	0.77008	0.83233	0.64063	0.84607	1.02562	0.90818	0.76057	0.4306	0.85139	0.83592	1.00607	0.64206	0.8318	0.84713	0.76654	0.87528	0.88241	0.80497	1.06225	0.8211	0.76098	0.75915
Saitoella_complicata/141-699	0.78125	0.65871	0.66744	0.69158	0.64324	0.66295	0.82874	0.65946	0.95257	0.9479	0.62362	0.74167	0.71249	0.70443	0.75585	0.39696	0.68219	0.69661	0.64141	0.93696	0.78413	0.59666	1.03486	0.65613	0.60341	0.57479	0.74638
Schizosaccharomyces_pombe/99-658	0.8931	0.79668	0.77212	0.8249	0.78793	0.8001	0.89158	0.78209	1.00467	1.01453	0.73113	0.88138	0.85277	0.83258	0.82745	0.63789	0.78763	0.80125	0.72503	1.07574	0.90753	0.75786	1.00614	0.78379	0.72146	0.70415	0.88391	0.67534
Spizellomyces_punctatus/192-795	0.71894	0.77422	0.69889	0.60283	0.75625	0.76873	0.92128	0.76358	0.96174	0.86141	0.76068	0.87315	0.75291	0.78244	0.75489	0.47678	0.76807	0.71017	0.63785	1.05984	0.80056	0.54282	1.06968	0.63986	0.6123	0.57369	0.83612	0.55622	0.77346
Sporothrix_schenckii/356-1040	0.96897	0.6156	0.5225	0.9104	0.63315	0.38936	1.00214	0.55223	1.09428	1.0422	0.59262	0.87627	0.30612	0.57347	0.97362	0.6044	0.27044	0.55039	0.72649	1.14756	0.91253	0.8105	1.15188	0.80189	0.72743	0.71155	0.88037	0.74348	0.85799	0.79362
Trichoderma_harzianum/185-808	0.86112	0.62247	0.49742	0.88657	0.61757	0.36961	0.91224	0.5112	1.03598	0.95363	0.61559	0.80712	0.18249	0.55173	0.92877	0.5814	0.24409	0.53155	0.72343	1.0851	0.81402	0.76429	1.08964	0.76551	0.71931	0.68983	0.8077	0.71744	0.8175	0.7386	0.33073
Yarrowia_lipolytica/341-1125	0.96277	0.77275	0.75171	0.9041	0.76286	0.75566	0.87415	0.79994	1.11364	0.99885	0.72695	0.73011	0.79967	0.80131	0.90753	0.51491	0.77595	0.77517	0.72701	1.15741	0.85409	0.68402	1.21473	0.72912	0.68806	0.62055	0.70899	0.66224	0.82279	0.73928	0.82869	0.81559

## Sheet: Tpi1_Gapdh
	Allomyces_macrogynus/1-249	Alternaria_alternata/1-248	Aspergillus_fumigatus/1-249	Batrachochytrium_dendrobatidis/1-251	Bipolaris_maydis/1-248	Botrytis_cinerea/1-247	Candida_albicans/1-248	Coccidioides_immitis/1-249	Coemansia_reversa/1-249	Conidiobolus_coronatus/1-237	Cucurbitaria_berberidis/1-248	Eremothecium_cymbalariae/1-248	Fusarium_oxysporum/1-247	Histoplasma_capsulatum/1-249	Linderina_pennispora/1-249	Neolecta_irregularis/1-264	Neurospora_crassa/1-248	Penicillium_chrysogenum/1-249	Phycomyces_blakesleeanus/1-247	Pichia_kudriavzevii/1-250	Pneumocystis_jirovecii/1-250	Podila_verticillata/1-249	Pyricularia_oryzae/1-250	Rhizophagus_irregularis/1-247	Rhizopus_arrhizus/1-247	Rhizopus_stolonifer/1-247	Saccharomyces_cerevisiae/1-248	Saitoella_complicata/1-247	Schizosaccharomyces_pombe/1-249	Spizellomyces_punctatus/1-250	Sporothrix_schenckii/1-269	Trichoderma_harzianum/1-248	Yarrowia_lipolytica/1-247
Allomyces_macrogynus/1-249
Alternaria_alternata/1-248	0.64891
Aspergillus_fumigatus/1-249	0.59838	0.37812
Batrachochytrium_dendrobatidis/1-251	0.63843	0.77836	0.62765
Bipolaris_maydis/1-248	0.63571	0.08263	0.35456	0.74423
Botrytis_cinerea/1-247	0.67647	0.22215	0.35384	0.72297	0.2044
Candida_albicans/1-248	0.67022	0.61696	0.61182	0.85321	0.60816	0.65421
Coccidioides_immitis/1-249	0.64123	0.35976	0.31219	0.69702	0.3578	0.38961	0.58867
Coemansia_reversa/1-249	0.68376	0.65516	0.68201	0.83101	0.63957	0.69495	0.7731	0.68215
Conidiobolus_coronatus/1-237	0.6586	0.64011	0.58945	0.72533	0.56869	0.62337	0.74674	0.63023	0.63739
Cucurbitaria_berberidis/1-248	0.67024	0.15106	0.37772	0.74515	0.14301	0.21638	0.64174	0.4074	0.61886	0.59697
Eremothecium_cymbalariae/1-248	0.77603	0.6713	0.69936	0.77239	0.63988	0.68512	0.49704	0.66357	0.6941	0.76969	0.6465
Fusarium_oxysporum/1-247	0.64995	0.37997	0.46131	0.68292	0.36783	0.37999	0.63771	0.49691	0.6203	0.5812	0.41143	0.68831
Histoplasma_capsulatum/1-249	0.6297	0.39279	0.27723	0.72093	0.36229	0.37949	0.59773	0.27689	0.73973	0.6502	0.37347	0.64394	0.51588
Linderina_pennispora/1-249	0.65928	0.58867	0.61973	0.78804	0.58301	0.64391	0.7335	0.64147	0.24329	0.61104	0.58381	0.65487	0.5622	0.69801
Neolecta_irregularis/1-264	0.80475	0.65335	0.65373	0.84781	0.67328	0.69439	0.79423	0.683	0.77538	0.73116	0.66239	0.83891	0.61628	0.64601	0.7573
Neurospora_crassa/1-248	0.64334	0.42795	0.49644	0.73342	0.42874	0.43654	0.62572	0.5519	0.64856	0.55876	0.42961	0.7147	0.35128	0.56542	0.59704	0.657
Penicillium_chrysogenum/1-249	0.57817	0.40188	0.1982	0.68622	0.37437	0.34841	0.63014	0.31061	0.69234	0.59511	0.42551	0.69432	0.45617	0.27866	0.64661	0.64583	0.54431
Phycomyces_blakesleeanus/1-247	0.50246	0.61318	0.58128	0.61291	0.60662	0.58581	0.75343	0.58948	0.62558	0.477	0.61872	0.64785	0.60732	0.64401	0.61623	0.69185	0.57586	0.57775
Pichia_kudriavzevii/1-250	0.69687	0.69489	0.68973	0.80632	0.69903	0.73495	0.4973	0.70653	0.66337	0.76218	0.71107	0.41354	0.68402	0.66223	0.65949	0.80718	0.6943	0.7123	0.66929
Pneumocystis_jirovecii/1-250	0.7423	0.61607	0.61615	0.82413	0.60372	0.59528	0.75741	0.61651	0.81943	0.73212	0.62882	0.71828	0.64366	0.63188	0.81756	0.76632	0.67178	0.63831	0.72222	0.7917
Podila_verticillata/1-249	0.56868	0.6624	0.60076	0.55045	0.66856	0.66883	0.80389	0.64945	0.56313	0.51708	0.66499	0.7257	0.528	0.7467	0.48872	0.67107	0.58197	0.64398	0.45263	0.74193	0.77053
Pyricularia_oryzae/1-250	0.69744	0.43603	0.50136	0.73043	0.39673	0.39708	0.66052	0.4592	0.57898	0.61422	0.42114	0.64291	0.31758	0.49603	0.60976	0.57296	0.42852	0.49148	0.5985	0.63987	0.64895	0.5529
Rhizophagus_irregularis/1-247	0.51634	0.59263	0.51925	0.56809	0.56194	0.59688	0.67972	0.53594	0.67275	0.49054	0.61073	0.70041	0.54658	0.55576	0.59205	0.65975	0.51033	0.52419	0.39135	0.72119	0.62457	0.4145	0.54405
Rhizopus_arrhizus/1-247	0.52851	0.61983	0.69636	0.68741	0.58324	0.64632	0.75764	0.70357	0.61328	0.51942	0.61617	0.60583	0.6504	0.72343	0.60908	0.79814	0.61081	0.68437	0.34521	0.72001	0.7959	0.53961	0.623	0.55215
Rhizopus_stolonifer/1-247	0.55694	0.59117	0.65236	0.70597	0.54766	0.66169	0.68046	0.67105	0.60923	0.50057	0.58004	0.59297	0.62412	0.67342	0.63033	0.79343	0.62995	0.66128	0.33248	0.75213	0.81742	0.50399	0.65319	0.51637	0.19153
Saccharomyces_cerevisiae/1-248	0.74201	0.70498	0.68626	0.82128	0.68077	0.6778	0.47593	0.66485	0.68225	0.71059	0.68589	0.20022	0.67973	0.6265	0.62488	0.81145	0.64434	0.65049	0.61105	0.3597	0.74597	0.71918	0.61621	0.69021	0.57992	0.64464
Saitoella_complicata/1-247	0.64574	0.37624	0.45412	0.70268	0.35121	0.37354	0.67451	0.48115	0.57769	0.59199	0.39133	0.72923	0.44297	0.4891	0.58215	0.58828	0.43963	0.42047	0.57835	0.66689	0.63411	0.563	0.41102	0.52998	0.64566	0.63022	0.72331
Schizosaccharomyces_pombe/1-249	0.66798	0.58398	0.59131	0.81257	0.56803	0.57582	0.67681	0.53826	0.77842	0.68526	0.58258	0.69231	0.6828	0.604	0.75196	0.67774	0.6764	0.58654	0.62586	0.69146	0.69208	0.64216	0.57634	0.6101	0.71162	0.67563	0.66416	0.59678
Spizellomyces_punctatus/1-250	0.64652	0.62849	0.65748	0.5577	0.59327	0.66475	0.85821	0.7196	0.646	0.60204	0.60454	0.7793	0.64666	0.70993	0.65797	0.80533	0.63549	0.72456	0.55055	0.76947	0.79715	0.47809	0.68689	0.60601	0.55492	0.54537	0.863	0.61336	0.72554
Sporothrix_schenckii/1-269	1.507	1.40457	1.57924	1.7546	1.45874	1.5228	1.46713	1.62076	1.44158	1.61251	1.42617	1.52272	1.39803	1.61852	1.34535	1.75386	1.52895	1.58505	1.55413	1.45519	1.70664	1.53565	1.58899	1.66552	1.58902	1.53911	1.54392	1.51224	1.5764	1.42687
Trichoderma_harzianum/1-248	0.65087	0.31634	0.44227	0.69857	0.3244	0.32161	0.64944	0.44257	0.61351	0.61406	0.32054	0.64929	0.20222	0.46504	0.58622	0.63244	0.38439	0.46708	0.62107	0.66351	0.59527	0.54566	0.31412	0.58812	0.63782	0.62933	0.66298	0.39625	0.62051	0.61312	1.44942
Yarrowia_lipolytica/1-247	0.74885	0.60148	0.54256	0.7838	0.5938	0.58995	0.50032	0.60828	0.68983	0.65802	0.60983	0.45283	0.57054	0.57	0.64595	0.71982	0.57066	0.59263	0.68725	0.48948	0.69878	0.6471	0.5653	0.674	0.72048	0.73027	0.45267	0.62674	0.67538	0.77634	1.47004	0.52951

## Sheet: Act1_Gapdh
	Allomyces_macrogynus/1-375	Alternaria_alternata/1-375	Aspergillus_fumigatus/1-388	Batrachochytrium_dendrobatidis/1-332	Bipolaris_maydis/1-375	Botrytis_cinerea/1-375	Candida_albicans/1-376	Coccidioides_immitis/1-375	Coemansia_reversa/1-375	Conidiobolus_coronatus/1-360	Cucurbitaria_berberidis/1-375	Eremothecium_cymbalariae/1-376	Fusarium_oxysporum/1-375	Histoplasma_capsulatum/1-375	Linderina_pennispora/1-368	Neolecta_irregularis/1-374	Neurospora_crassa/1-375	Penicillium_chrysogenum/1-375	Phycomyces_blakesleeanus/1-375	Pichia_kudriavzevii/1-377	Pneumocystis_jirovecii/1-383	Podila_verticillata/1-375	Pyricularia_oryzae/1-375	Rhizophagus_irregularis/1-375	Rhizopus_arrhizus/1-375	Rhizopus_stolonifer/1-375	Saccharomyces_cerevisae/1-375	Saitoella_complicata/1-398	Schizosaccharomyces_pombe/1-375	Spizellomyces_punctatus/1-375	Sporothrix_schenckii/1-422	Trichoderma_harzianum/1-375	Yarrowia_lipolytica/1-375
Allomyces_macrogynus/1-375
Alternaria_alternata/1-375	0.14258
Aspergillus_fumigatus/1-388	0.14599	0.00527
Batrachochytrium_dendrobatidis/1-332	0.09447	0.09266	0.09266
Bipolaris_maydis/1-375	0.14258	0	0.00527	0.09266
Botrytis_cinerea/1-375	0.14554	0.00523	0.01056	0.0961	0.00523
Candida_albicans/1-376	0.16786	0.11361	0.11737	0.12376	0.11361	0.11091
Coccidioides_immitis/1-375	0.14533	0.02368	0.0292	0.09892	0.02368	0.02901	0.11902
Coemansia_reversa/1-375	0.1263	0.1292	0.13603	0.09457	0.1292	0.12647	0.13885	0.1379
Conidiobolus_coronatus/1-360	0.14102	0.14611	0.14611	0.10097	0.14611	0.14959	0.16804	0.14898	0.12783
Cucurbitaria_berberidis/1-375	0.14258	0	0.00527	0.09266	0	0.00523	0.11361	0.02368	0.1292	0.14611
Eremothecium_cymbalariae/1-376	0.15813	0.09831	0.1019	0.10904	0.09831	0.09564	0.06197	0.09575	0.14221	0.14491	0.09831
Fusarium_oxysporum/1-375	0.14273	0.00787	0.01324	0.09303	0.00787	0.00787	0.11989	0.03174	0.1329	0.14931	0.00787	0.09866
Histoplasma_capsulatum/1-375	0.14224	0.01838	0.02384	0.09898	0.01838	0.02369	0.11337	0.01047	0.12979	0.14906	0.01838	0.0958	0.02639
Linderina_pennispora/1-368	0.11263	0.10436	0.10436	0.06511	0.10436	0.10753	0.12304	0.11304	0.03562	0.11794	0.10436	0.12875	0.11069	0.10716
Neolecta_irregularis/1-374	0.6479	0.6014	0.61537	0.6092	0.6014	0.60679	0.61919	0.61031	0.61194	0.61857	0.6014	0.61911	0.60154	0.60652	0.61197
Neurospora_crassa/1-375	0.14273	0.00787	0.01324	0.09303	0.00787	0.00787	0.11989	0.03174	0.1329	0.14931	0.00787	0.09866	0	0.02639	0.11069	0.60154
Penicillium_chrysogenum/1-375	0.15155	0.00785	0.0132	0.10224	0.00785	0.00785	0.11403	0.03165	0.12617	0.15353	0.00785	0.10106	0.01579	0.02632	0.10727	0.60989	0.01579
Phycomyces_blakesleeanus/1-375	0.09775	0.08711	0.09339	0.0608	0.08711	0.09013	0.12848	0.08976	0.09651	0.10475	0.08711	0.11313	0.08742	0.0898	0.08946	0.61213	0.08742	0.09554
Pichia_kudriavzevii/1-377	0.15519	0.09236	0.09588	0.1061	0.09236	0.0897	0.06174	0.09547	0.14149	0.15215	0.09236	0.02632	0.09839	0.09552	0.12262	0.61298	0.09839	0.09509	0.11034
Pneumocystis_jirovecii/1-383	0.12176	0.09274	0.09907	0.07714	0.09274	0.09599	0.13152	0.10373	0.12843	0.11974	0.09274	0.13569	0.09902	0.10378	0.10117	0.63269	0.09902	0.09915	0.08939	0.12488
Podila_verticillata/1-375	0.09485	0.08506	0.09136	0.05182	0.08506	0.08809	0.12378	0.08215	0.10333	0.1083	0.08506	0.09642	0.08536	0.08779	0.08148	0.61714	0.08536	0.09354	0.06272	0.09935	0.07578
Pyricularia_oryzae/1-375	0.14235	0.01316	0.01859	0.09956	0.01316	0.00788	0.11992	0.03713	0.1297	0.15213	0.01316	0.09869	0.00525	0.03176	0.11671	0.60766	0.00525	0.01579	0.09013	0.09842	0.10226	0.09113
Rhizophagus_irregularis/1-375	0.09553	0.09108	0.09747	0.03344	0.09108	0.09414	0.11835	0.09378	0.08412	0.1057	0.09108	0.09963	0.09141	0.08817	0.06765	0.59973	0.09141	0.09962	0.05151	0.10257	0.07933	0.03508	0.09722
Rhizopus_arrhizus/1-375	0.0916	0.07853	0.0847	0.04214	0.07853	0.0815	0.12204	0.08119	0.08541	0.09844	0.07853	0.10089	0.07881	0.08123	0.07245	0.60318	0.07881	0.08689	0.01847	0.10374	0.07838	0.04847	0.08151	0.03493
Rhizopus_stolonifer/1-375	0.09171	0.08421	0.09044	0.0422	0.08421	0.08721	0.11634	0.08687	0.08307	0.09858	0.08421	0.10102	0.08451	0.08691	0.07002	0.60182	0.08451	0.09021	0.02382	0.10388	0.07847	0.04853	0.08721	0.03498	0.00526
Saccharomyces_cerevisae/1-375	0.15222	0.08159	0.08502	0.09613	0.08159	0.07892	0.05403	0.0814	0.13639	0.14167	0.08159	0.01842	0.08188	0.08144	0.11681	0.61599	0.08188	0.08431	0.10189	0.0318	0.12443	0.09096	0.0819	0.09415	0.0898	0.08992
Saitoella_complicata/1-398	0.12872	0.077	0.08325	0.07794	0.077	0.08001	0.13932	0.09386	0.12785	0.13456	0.077	0.11454	0.07728	0.0939	0.10576	0.62599	0.07728	0.08548	0.08833	0.11136	0.09587	0.06047	0.08304	0.06343	0.07418	0.07427	0.10315
Schizosaccharomyces_pombe/1-375	0.10735	0.08253	0.08882	0.06795	0.08253	0.08525	0.14469	0.09094	0.12435	0.12536	0.08253	0.12305	0.08253	0.09098	0.09654	0.60991	0.08253	0.08861	0.08493	0.10831	0.0719	0.06881	0.08828	0.0662	0.07366	0.07376	0.10822	0.0606
Spizellomyces_punctatus/1-375	0.09443	0.09897	0.10177	0.01499	0.09897	0.10205	0.12345	0.10166	0.08643	0.0992	0.09897	0.1019	0.09933	0.10171	0.05861	0.61765	0.09933	0.10751	0.05391	0.09921	0.08186	0.04593	0.10514	0.02965	0.04285	0.0429	0.09645	0.07455	0.07732
Sporothrix_schenckii/1-422	0.14698	0.02109	0.0266	0.09996	0.02109	0.02109	0.12595	0.03975	0.13466	0.14863	0.02109	0.10482	0.01315	0.03438	0.11168	0.62531	0.01315	0.02376	0.09105	0.11338	0.10308	0.089	0.01845	0.09267	0.08234	0.0881	0.0873	0.08416	0.08617	0.10068
Trichoderma_harzianum/1-375	0.14579	0.01051	0.01591	0.09628	0.01051	0.01051	0.12284	0.03443	0.12994	0.15252	0.01051	0.10154	0.00262	0.02907	0.10774	0.6018	0.00262	0.01844	0.09028	0.10126	0.10191	0.08823	0.00788	0.0943	0.08164	0.08735	0.08472	0.08015	0.0854	0.10222	0.01579
Yarrowia_lipolytica/1-375	0.17282	0.10273	0.10925	0.13054	0.10273	0.09967	0.12895	0.11111	0.15004	0.16419	0.10273	0.11985	0.10857	0.11117	0.13354	0.63812	0.10857	0.10551	0.11124	0.11047	0.12965	0.11598	0.1086	0.11634	0.10845	0.11437	0.10848	0.1261	0.12275	0.12125	0.11245	0.11151

## Sheet: Cdc42_Gapdh
	Allomyces_macrogynus/1-193	Alternaria_alternata/1-200	Aspergillus_fumigatus/1-192	Batrachochytrium_dendrobatidis/1-190	Bipolaris_maydis/1-200	Botrytis_cinerea/1-194	Candida_albicans/1-191	Coccidioides_immitis/1-194	Coemansia_reversa/1-191	Conidiobolus_coronatus/1-191	Cucurbitaria_berberidis/1-199	Eremothecium_cymbalariae/1-191	Fusarium_oxysporum/1-195	Histoplasma_capsulatum/1-192	Linderina_pennispora/1-191	Neolecta_irregularis/1-196	Neurospora_crassa/1-200	Penicillium_chrysogenum/1-193	Phycomyces_blakesleeanus/1-191	Pichia_kudriavzevii/1-195	Pneumocystis_jirovecii/1-191	Podila_verticillata/1-191	Pyricularia_oryzae/1-194	Rhizophagus_irregularis/1-191	Rhizopus_arrhizus/1-191	Rhizopus_stolonifer/1-192	Saccharomyces_cerevisiae/1-191	Saitoella_complicata/1-191	Schizosaccharomyces_pombe/1-192	Spizellomyces_punctatus/1-191	Sporothrix_schenckii/1-215	Trichoderma_harzianum/1-194	Yarrowia_lipolytica/1-191
Allomyces_macrogynus/1-193
Alternaria_alternata/1-200	0.25746
Aspergillus_fumigatus/1-192	0.24307	0.10458
Batrachochytrium_dendrobatidis/1-190	0.22362	0.21932	0.19547
Bipolaris_maydis/1-200	0.25999	0.03116	0.11082	0.22176
Botrytis_cinerea/1-194	0.25852	0.10101	0.07786	0.21419	0.09007
Candida_albicans/1-191	0.26819	0.24451	0.22568	0.2573	0.24919	0.25296
Coccidioides_immitis/1-194	0.26201	0.093	0.0718	0.20444	0.08879	0.0902	0.24364
Coemansia_reversa/1-191	0.27733	0.23112	0.21756	0.18514	0.2305	0.2285	0.25992	0.24409
Conidiobolus_coronatus/1-191	0.21431	0.1667	0.1427	0.13056	0.16721	0.15982	0.20831	0.17075	0.20705
Cucurbitaria_berberidis/1-199	0.26938	0.05334	0.1112	0.21255	0.05268	0.10725	0.2639	0.09382	0.24004	0.15394
Eremothecium_cymbalariae/1-191	0.23988	0.21198	0.22844	0.21267	0.21468	0.25386	0.13797	0.23678	0.25502	0.1656	0.2236
Fusarium_oxysporum/1-195	0.25558	0.09926	0.07136	0.21393	0.09979	0.06094	0.25516	0.07747	0.22926	0.15877	0.1007	0.2479
Histoplasma_capsulatum/1-192	0.25267	0.10454	0.04304	0.21039	0.09385	0.06118	0.21898	0.06628	0.22672	0.16163	0.10533	0.22014	0.06042
Linderina_pennispora/1-191	0.2094	0.18286	0.20545	0.15243	0.19168	0.20866	0.24459	0.20512	0.20184	0.11912	0.18086	0.21249	0.17896	0.21421
Neolecta_irregularis/1-196	0.49331	0.5983	0.5881	0.50012	0.59784	0.62761	0.51888	0.60445	0.56693	0.55563	0.60586	0.50291	0.60331	0.61593	0.54069
Neurospora_crassa/1-200	0.49692	0.49594	0.50434	0.46376	0.49824	0.53362	0.46373	0.51466	0.53774	0.47666	0.50639	0.46749	0.50008	0.49526	0.49313	0.34025
Penicillium_chrysogenum/1-193	0.28232	0.1051	0.03251	0.2091	0.10483	0.09599	0.22589	0.08686	0.22105	0.16999	0.11186	0.24209	0.09482	0.06026	0.22126	0.62116	0.52383
Phycomyces_blakesleeanus/1-191	0.20285	0.16156	0.13039	0.14821	0.1553	0.15674	0.17377	0.1501	0.20746	0.0917	0.16788	0.14814	0.1593	0.13488	0.13323	0.53009	0.48989	0.14853
Pichia_kudriavzevii/1-195	0.32077	0.35454	0.33847	0.30881	0.34127	0.35921	0.26509	0.34713	0.35769	0.24962	0.35181	0.24179	0.35451	0.32798	0.31599	0.56219	0.53754	0.35855	0.24624
Pneumocystis_jirovecii/1-191	0.2316	0.23593	0.21099	0.18659	0.22738	0.21923	0.22442	0.20678	0.24561	0.13991	0.23364	0.20732	0.21112	0.21366	0.17576	0.52819	0.48755	0.22516	0.14136	0.30163
Podila_verticillata/1-191	0.21841	0.18149	0.18269	0.19442	0.18974	0.20173	0.23153	0.19153	0.25984	0.11214	0.1932	0.20565	0.17963	0.19613	0.13893	0.58071	0.49917	0.19662	0.12786	0.32396	0.17007
Pyricularia_oryzae/1-194	0.25005	0.09194	0.06518	0.2204	0.08134	0.06672	0.23398	0.07126	0.23682	0.15967	0.09982	0.22682	0.0377	0.0436	0.20622	0.59767	0.50016	0.08829	0.14026	0.3433	0.21166	0.16816
Rhizophagus_irregularis/1-191	0.22418	0.16042	0.14267	0.15467	0.15569	0.14826	0.19582	0.14483	0.20664	0.08936	0.16194	0.16369	0.13394	0.13065	0.14444	0.53802	0.46506	0.1559	0.0964	0.27359	0.13366	0.1146	0.13441
Rhizopus_arrhizus/1-191	0.2104	0.16772	0.14468	0.16546	0.16143	0.15805	0.17898	0.15838	0.21874	0.10409	0.18097	0.15307	0.16757	0.14911	0.14004	0.52711	0.47794	0.16961	0.02716	0.25027	0.13469	0.14121	0.14823	0.10209
Rhizopus_stolonifer/1-192	0.44977	0.48204	0.49033	0.40214	0.48	0.47696	0.45324	0.49035	0.49491	0.42026	0.48977	0.43684	0.48367	0.49558	0.39845	0.2427	0.23325	0.49283	0.43537	0.51983	0.44409	0.46147	0.46734	0.42085	0.43379
Saccharomyces_cerevisiae/1-191	0.23357	0.2392	0.21876	0.20235	0.22732	0.2532	0.13771	0.23599	0.2535	0.16099	0.23111	0.06561	0.24749	0.22003	0.21109	0.4905	0.48756	0.23428	0.1411	0.24705	0.20056	0.19573	0.22643	0.15209	0.15345	0.44006
Saitoella_complicata/1-191	0.22264	0.15028	0.15742	0.16073	0.15158	0.17553	0.20674	0.17441	0.23041	0.0849	0.14279	0.17442	0.1616	0.1577	0.11881	0.55363	0.45	0.16563	0.09688	0.30532	0.15909	0.11913	0.16253	0.08398	0.10964	0.43309	0.15889
Schizosaccharomyces_pombe/1-192	0.20723	0.18997	0.17044	0.17882	0.18566	0.17771	0.19693	0.19273	0.21572	0.09238	0.17388	0.17739	0.16716	0.16447	0.14466	0.58012	0.49686	0.1871	0.11119	0.2561	0.14569	0.14587	0.16811	0.09206	0.12317	0.46594	0.17263	0.10802
Spizellomyces_punctatus/1-191	0.23909	0.19576	0.19795	0.09669	0.19807	0.22796	0.21923	0.21027	0.20608	0.14175	0.20367	0.19129	0.20429	0.20426	0.1476	0.48081	0.4311	0.21148	0.12101	0.27571	0.22287	0.1925	0.20251	0.17528	0.12245	0.38756	0.20388	0.14741	0.19627
Sporothrix_schenckii/1-215	0.26441	0.11074	0.09483	0.23442	0.11133	0.07873	0.26005	0.10044	0.2436	0.16573	0.12392	0.24212	0.04857	0.0837	0.19941	0.61234	0.53805	0.11218	0.16642	0.38577	0.22908	0.18656	0.07128	0.14047	0.17482	0.49084	0.24149	0.16883	0.17062	0.22501
Trichoderma_harzianum/1-194	0.25576	0.09256	0.05992	0.21572	0.08192	0.04958	0.24181	0.0823	0.22056	0.14705	0.09365	0.24326	0.0321	0.04906	0.18574	0.60843	0.52535	0.07095	0.14836	0.35235	0.21026	0.18093	0.04847	0.13511	0.1629	0.48551	0.24263	0.1505	0.1577	0.20583	0.04841
Yarrowia_lipolytica/1-191	0.26478	0.16647	0.19771	0.20558	0.1829	0.2242	0.18747	0.2092	0.20288	0.15256	0.19059	0.18251	0.19935	0.19793	0.16125	0.55998	0.52065	0.20027	0.13775	0.29941	0.19103	0.17134	0.1918	0.12252	0.14212	0.46131	0.17677	0.13604	0.15727	0.19956	0.20581	0.20027

## Sheet: Rho1_Gapdh
	Allomyces_macrogynus/1-192	Alternaria_alternata/1-193	Aspergillus_fumigatus/1-200	Batrachochytrium_dendrobatidiS/1-193	Bipolaris_maydis/1-193	Botrytis_cinerea/1-192	Candida_albicans/1-198	Coccidioides_immitis/1-193	Coemansia_reversa/1-222	Conidiobolus_coronatus/1-203	Cucurbitaria_berberidis/1-200	Eremothecium_cymbalariae/1-207	Fusarium_oxysporum/1-195	Histoplasma_capsulatum/1-192	Linderina_pennispora/1-195	Neolecta_irregularis/1-192	Neurospora_crassa/1-195	Penicillium_chrysogenum/1-198	Phycomyces_blakesleeanus/1-195	Pichia_kudriavzevii/1-197	Pneumocystis_jirovecii/1-212	Podila_verticillata/1-196	Pyricularia_oryzae/1-193	Rhizophagus_irregularis/1-194	Rhizopus_arrhizus/1-193	Rhizopus_stolonifer/1-197	Saccharomyces_cerevisiae/1-209	Saitoella_complicata/1-208	Schizosaccharomyces_pombe/1-202	Spizellomyces_punctatus/1-196	Sporothrix_schenckii/1-196	Trichoderma_harzianum/1-195	Yarrowia_lipolytica/1-203
Allomyces_macrogynus/1-192
Alternaria_alternata/1-193	0.23206
Aspergillus_fumigatus/1-200	0.24921	0.07431
Batrachochytrium_dendrobatidiS/1-193	0.30418	0.23058	0.20965
Bipolaris_maydis/1-193	0.22561	0.00526	0.08013	0.23711
Botrytis_cinerea/1-192	0.23864	0.0976	0.11118	0.22087	0.09178
Candida_albicans/1-198	0.34703	0.28961	0.26749	0.33775	0.28285	0.23929
Coccidioides_immitis/1-193	0.25165	0.10278	0.0676	0.24888	0.10865	0.14732	0.28813
Coemansia_reversa/1-222	0.86644	0.89884	0.8756	0.84052	0.8898	0.88511	0.82601	0.88592
Conidiobolus_coronatus/1-203	0.63326	0.65155	0.58213	0.69962	0.65206	0.66601	0.67153	0.61723	1.14501
Cucurbitaria_berberidis/1-200	0.63057	0.61378	0.56881	0.69823	0.60564	0.63118	0.64047	0.58802	1.00086	0.78675
Eremothecium_cymbalariae/1-207	0.43631	0.35614	0.3314	0.41879	0.36322	0.30885	0.27592	0.36484	0.78957	0.69695	0.71096
Fusarium_oxysporum/1-195	0.22416	0.08388	0.10267	0.23827	0.07821	0.12202	0.26399	0.13311	0.87629	0.65953	0.61388	0.37926
Histoplasma_capsulatum/1-192	0.25145	0.09606	0.06032	0.22784	0.10185	0.14018	0.2828	0.07246	0.86663	0.61099	0.60263	0.34914	0.11997
Linderina_pennispora/1-195	0.24687	0.2085	0.19942	0.26374	0.21491	0.20759	0.25894	0.21374	0.83194	0.70198	0.58791	0.36325	0.22838	0.19282
Neolecta_irregularis/1-192	0.28638	0.19649	0.19837	0.27869	0.20288	0.2213	0.2992	0.23014	0.76968	0.66506	0.61449	0.4022	0.20237	0.21803	0.27669
Neurospora_crassa/1-195	0.30211	0.19386	0.1605	0.281	0.2002	0.22376	0.30031	0.17415	0.83853	0.66005	0.66316	0.40842	0.17339	0.18795	0.24076	0.24368
Penicillium_chrysogenum/1-198	0.27168	0.13045	0.10537	0.23556	0.12442	0.14397	0.29497	0.13643	0.83569	0.65919	0.60883	0.39153	0.11441	0.12855	0.25163	0.21994	0.21032
Phycomyces_blakesleeanus/1-195	0.6291	0.6577	0.64404	0.71645	0.66625	0.67302	0.70616	0.66072	0.97044	0.7993	0.92269	0.73872	0.63223	0.66337	0.62466	0.60899	0.66291	0.65583
Pichia_kudriavzevii/1-197	0.35252	0.32062	0.27928	0.33841	0.31389	0.27163	0.22701	0.33708	0.76031	0.66387	0.74291	0.34148	0.30103	0.30684	0.3154	0.34626	0.37235	0.31007	0.64168
Pneumocystis_jirovecii/1-212	0.38787	0.32903	0.32344	0.39363	0.32208	0.3269	0.40944	0.34161	0.86653	0.83137	0.7741	0.56409	0.33771	0.35407	0.36845	0.33826	0.38793	0.35184	0.76204	0.44904
Podila_verticillata/1-196	0.25896	0.25099	0.25569	0.3597	0.25744	0.24502	0.31498	0.22827	0.91856	0.65951	0.62883	0.41801	0.23022	0.25266	0.27749	0.32642	0.29577	0.27401	0.69265	0.40183	0.42064
Pyricularia_oryzae/1-193	0.22803	0.08424	0.09795	0.22564	0.08998	0.14112	0.27619	0.10233	0.84374	0.66022	0.58899	0.36472	0.06026	0.12225	0.21918	0.20165	0.1669	0.12382	0.65589	0.30634	0.31822	0.20864
Rhizophagus_irregularis/1-194	0.23087	0.13188	0.14713	0.234	0.12601	0.13782	0.26216	0.15629	0.85012	0.68558	0.58853	0.36217	0.11929	0.15244	0.19975	0.20523	0.19509	0.1699	0.67153	0.32761	0.33529	0.23713	0.13189
Rhizopus_arrhizus/1-193	0.19113	0.19378	0.17555	0.27477	0.18759	0.17843	0.24023	0.20054	0.87934	0.60222	0.58959	0.34247	0.16277	0.1761	0.20408	0.23526	0.23305	0.21571	0.70903	0.31573	0.39519	0.239	0.18109	0.16809
Rhizopus_stolonifer/1-197	0.23815	0.17656	0.18092	0.25572	0.18287	0.18857	0.27833	0.20196	0.86552	0.68582	0.62825	0.38716	0.17717	0.1855	0.23575	0.22663	0.27212	0.20657	0.67425	0.31803	0.36227	0.28765	0.18203	0.16996	0.17534
Saccharomyces_cerevisiae/1-209	0.35277	0.32518	0.29972	0.35566	0.33231	0.3009	0.23034	0.32294	0.7946	0.70642	0.68493	0.21808	0.32792	0.31829	0.29237	0.34627	0.33927	0.36182	0.6249	0.2776	0.48495	0.37032	0.30584	0.28632	0.29928	0.31472
Saitoella_complicata/1-208	0.24071	0.14009	0.15487	0.18582	0.13411	0.16366	0.26152	0.1913	0.77375	0.70222	0.61844	0.38373	0.13453	0.16822	0.21464	0.16874	0.2275	0.19024	0.64285	0.27323	0.31587	0.26263	0.14497	0.15706	0.17746	0.19137	0.31815
Schizosaccharomyces_pombe/1-202	0.22794	0.20151	0.19109	0.23609	0.19524	0.16814	0.2672	0.21278	0.83342	0.70257	0.66387	0.41076	0.20534	0.20643	0.16821	0.25438	0.23335	0.22499	0.6046	0.31623	0.3157	0.29798	0.19877	0.19636	0.22421	0.20078	0.35303	0.19184
Spizellomyces_punctatus/1-196	0.23707	0.17191	0.15864	0.18149	0.17825	0.17672	0.27204	0.18915	0.89715	0.67039	0.65094	0.38151	0.16244	0.17386	0.18507	0.23509	0.22275	0.20661	0.67985	0.33172	0.34667	0.28805	0.17473	0.17724	0.19087	0.19166	0.30519	0.1552	0.17652
Sporothrix_schenckii/1-196	0.23306	0.08981	0.08257	0.23274	0.08411	0.11553	0.25225	0.11857	0.88184	0.62673	0.5691	0.35671	0.04971	0.10615	0.20718	0.18845	0.16593	0.13622	0.65979	0.29575	0.31803	0.24874	0.06689	0.12662	0.13435	0.19421	0.32954	0.12213	0.19753	0.1641
Trichoderma_harzianum/1-195	0.28406	0.18827	0.20226	0.26731	0.19459	0.18868	0.26465	0.20767	0.89484	0.69035	0.66406	0.35256	0.15645	0.21096	0.27202	0.25744	0.28036	0.2135	0.63935	0.34749	0.378	0.29793	0.15794	0.21677	0.23013	0.25252	0.32192	0.22865	0.26405	0.24338	0.17325
Yarrowia_lipolytica/1-203	0.29979	0.23123	0.22985	0.27533	0.23761	0.25157	0.27324	0.25774	0.87584	0.7416	0.6768	0.38427	0.25653	0.22942	0.25488	0.29285	0.29245	0.27881	0.65835	0.31541	0.41208	0.3576	0.23995	0.24144	0.24102	0.23373	0.31913	0.22399	0.24957	0.21408	0.24735	0.28772
