# Supplementary material for: Emergence of Dip2-mediated specific DAG-based PKC signalling axis in eukaryotes
Source: eLife journal article supplement (doi:10.7554/elife.104011), 2025-01-09
Supplement: fig5-figsupp2-data1 [file Figure 5. figure supplement 2C.xlsx]

## Sheet: Dip2_33seq_MAFFT_DM
	Allomyces_macrogynus/1-1547	Alternaria_alternata/1-1610	Aspergillus_fumigatus/1-1861	Batrachochytrium_dendrobatidis/1-1316	Bipolaris_maydis/1-1744	Botrytis_cinerea/1-1873	Candida_albicans/1-1602	Coccidioides_immitis/1-1717	Coemansia_reversa/1-1328	Conidiobolus_coronatus/1-1650	Cucurbitaria_berberidis/1-1930	Eremothecium_cymbalariae/1-1632	Fusarium_oxysporum/1-1794	Histoplasma_capsulatum/1-1889	Linderina_pennispora/1-2096	Neolecta_irregularis/1-1545	Neurospora_crassa/1-1860	Penicillium_chrysogenum/1-1892	Phycomyces_blakesleeanus/1-1363	Pichia_kudriavzevii/1-1548	Pneumocystis_jirovecii/1-1492	Podila_verticillata/1-1824	Pyricularia_oryzae/1-1833	Rhizophagus_irregularis/1-1877	Rhizopus_arrhizus/1-1550	Rhizopus_stolonifer/1-1556	Saccharomyces_cerevisiae/1-1648	Saitoella_complicata/1-1572	Schizosaccharomyces_pombe/1-1517	Spizellomyces_punctatus/1-1968	Sporothrix_schenckii/1-1964	Trichoderma_harzianum/1-1874	Yarrowia_lipolytica/1-1476
Allomyces_macrogynus/1-1547
Alternaria_alternata/1-1610	1.81223
Aspergillus_fumigatus/1-1861	1.73054	0.41894
Batrachochytrium_dendrobatidis/1-1316	1.81325	1.55005	1.57673
Bipolaris_maydis/1-1744	1.71188	0.05348	0.47145	1.56429
Botrytis_cinerea/1-1873	1.77112	0.38283	0.3986	1.57538	0.41626
Candida_albicans/1-1602	1.89373	1.08271	1.11049	1.73653	1.0849	1.09665
Coccidioides_immitis/1-1717	1.70472	0.39569	0.34926	1.54453	0.52063	0.39306	1.06959
Coemansia_reversa/1-1328	1.79644	1.45104	1.40248	1.68974	1.41737	1.40079	1.67113	1.35832
Conidiobolus_coronatus/1-1650	1.97637	1.65914	1.57323	1.71866	1.61281	1.61926	1.85396	1.62123	1.53143
Cucurbitaria_berberidis/1-1930	1.79875	0.08559	0.5124	1.57404	0.15578	0.453	1.12553	0.49611	1.43524	1.66931
Eremothecium_cymbalariae/1-1632	2.35335	1.56405	1.52766	1.97837	1.53692	1.53407	1.48407	1.46698	1.98678	2.01858	1.58484
Fusarium_oxysporum/1-1794	1.71928	0.39333	0.43063	1.58316	0.44103	0.30566	1.11326	0.44952	1.38458	1.56354	0.48804	1.52488
Histoplasma_capsulatum/1-1889	1.7805	0.45486	0.38426	1.57424	0.52888	0.45293	1.12515	0.3436	1.39401	1.63015	0.57015	1.50354	0.50118
Linderina_pennispora/1-2096	1.78098	1.52282	1.46641	1.58498	1.4615	1.5264	1.75099	1.44051	0.39525	1.66227	1.53957	2.05764	1.51195	1.52203
Neolecta_irregularis/1-1545	1.68198	0.58649	0.56036	1.54786	0.56977	0.57195	1.10864	0.56164	1.43845	1.6214	0.61785	1.60277	0.58723	0.58919	1.51658
Neurospora_crassa/1-1860	1.70658	0.4131	0.47624	1.57992	0.47344	0.33922	1.07794	0.48951	1.40447	1.59489	0.51306	1.48646	0.30588	0.53966	1.53235	0.56288
Penicillium_chrysogenum/1-1892	1.75338	0.44078	0.2534	1.59319	0.47543	0.44422	1.11723	0.3666	1.42127	1.61235	0.51558	1.50959	0.47412	0.42271	1.51017	0.57652	0.49349
Phycomyces_blakesleeanus/1-1363	1.73505	1.15278	1.11623	1.50841	1.15464	1.12493	1.40799	1.13202	1.40189	1.52163	1.15448	1.73192	1.12334	1.10822	1.43058	1.08048	1.13219	1.11468
Pichia_kudriavzevii/1-1548	2.08344	1.23716	1.22825	1.85659	1.22475	1.28663	1.1658	1.22475	1.79501	1.902	1.26071	1.55253	1.26324	1.27341	1.8653	1.30696	1.27055	1.24963	1.52382
Pneumocystis_jirovecii/1-1492	1.85301	0.82151	0.80647	1.69012	0.79856	0.78504	1.21703	0.78016	1.48941	1.70452	0.84046	1.61038	0.78657	0.8026	1.59398	0.79513	0.80858	0.81143	1.25759	1.34243
Podila_verticillata/1-1824	1.76497	1.26196	1.34497	1.48729	1.32817	1.3455	1.55007	1.27259	1.47348	1.59888	1.39932	1.85796	1.35729	1.37549	1.56138	1.22117	1.36469	1.31182	1.14215	1.67097	1.36384
Pyricularia_oryzae/1-1833	1.69331	0.42013	0.44466	1.54757	0.43757	0.31611	1.08688	0.44508	1.39856	1.60968	0.49654	1.5064	0.28251	0.4839	1.54126	0.58082	0.29986	0.47007	1.11004	1.27807	0.82561	1.32009
Rhizophagus_irregularis/1-1877	1.84872	1.09168	1.13226	1.44043	1.06137	1.16472	1.33722	1.04707	1.38952	1.59403	1.15266	1.82659	1.10726	1.16586	1.55191	1.03614	1.09685	1.1324	1.02436	1.56439	1.13058	1.11055	1.12782
Rhizopus_arrhizus/1-1550	1.98612	1.4215	1.36757	1.62832	1.33938	1.37627	1.58651	1.29486	1.38076	1.75356	1.42967	1.9158	1.37212	1.39814	1.63608	1.30456	1.34358	1.36499	0.72956	1.57253	1.41443	1.28876	1.34682	1.27888
Rhizopus_stolonifer/1-1556	1.89651	1.50827	1.46556	1.71354	1.46358	1.51308	1.63618	1.43802	1.52562	1.78832	1.52565	1.93705	1.47075	1.49699	1.67258	1.42639	1.48275	1.50173	0.90497	1.71349	1.49467	1.42403	1.53239	1.36683	1.11344
Saccharomyces_cerevisiae/1-1648	2.45258	1.57988	1.57546	2.03135	1.5598	1.55652	1.48569	1.52211	2.04791	2.10405	1.58652	0.66893	1.56354	1.52967	2.10709	1.61978	1.55255	1.57042	1.80087	1.55253	1.67335	1.886	1.57535	1.83671	1.93412	1.9801
Saitoella_complicata/1-1572	1.75261	0.58282	0.55162	1.52416	0.55196	0.55693	1.08179	0.54016	1.39255	1.68293	0.60615	1.56222	0.53564	0.59239	1.51061	0.51626	0.53685	0.56191	1.0891	1.29584	0.77168	1.19264	0.55863	1.0179	1.3472	1.45271	1.65107
Schizosaccharomyces_pombe/1-1517	1.68076	0.85562	0.79505	1.66123	0.79435	0.8175	1.1209	0.75175	1.44556	1.70984	0.86757	1.67747	0.80402	0.8164	1.60008	0.7843	0.77892	0.79402	1.21872	1.3345	0.88127	1.32547	0.81724	1.14335	1.42509	1.58403	1.72418	0.72093
Spizellomyces_punctatus/1-1968	1.71589	1.48971	1.41951	1.16822	1.40551	1.46082	1.72594	1.35217	1.49571	1.63585	1.48204	1.89588	1.4228	1.49614	1.61279	1.42215	1.43946	1.44291	1.30432	1.84077	1.55217	1.41436	1.45193	1.41993	1.54357	1.64284	2.04347	1.4543	1.53292
Sporothrix_schenckii/1-1964	1.69741	0.41786	0.46402	1.55308	0.47086	0.37476	1.08314	0.45696	1.40185	1.58186	0.52248	1.554	0.32538	0.54902	1.50392	0.58054	0.34853	0.48868	1.10317	1.28103	0.80554	1.34268	0.30875	1.13169	1.40076	1.52805	1.55515	0.57532	0.80074	1.45979
Trichoderma_harzianum/1-1874	1.76087	0.42214	0.44268	1.57128	0.45017	0.32671	1.11674	0.46445	1.39586	1.62102	0.52171	1.50092	0.24356	0.52115	1.53726	0.58488	0.3073	0.48649	1.12732	1.27724	0.79272	1.3795	0.30229	1.15749	1.3901	1.52817	1.57926	0.55094	0.82672	1.5061	0.35604
Yarrowia_lipolytica/1-1476	1.79362	0.75215	0.74735	1.53409	0.74747	0.74688	0.9629	0.75525	1.55018	1.65983	0.77756	1.45191	0.75984	0.7521	1.5931	0.77809	0.7781	0.75751	1.2494	1.10833	0.9793	1.36689	0.76029	1.14597	1.40037	1.50491	1.44218	0.77404	0.90692	1.48736	0.75512	0.77242

## Sheet: Rpl5
	Allomyces_macrogynus/1-294	Alternaria_alternata/1-300	Aspergillus_fumigatus/1-300	Batrachochytrium_dendrobatidis/1-299	Bipolaris_maydis/1-301	Botrytis_cinerea/1-295	Candida_albicans/1-298	Coccidioides_immitis/1-300	Coemansia_reversa/1-293	Conidiobolus_coronatus/1-296	Cucurbitaria_berberidis/1-300	Eremothecium_cymbalariae/1-297	Fusarium_oxysporum/1-302	Histoplasma_capsulatum/1-299	Linderina_pennispora/1-293	Neolecta_irregularis/1-295	Neurospora_crassa/1-301	Penicillium_chrysogenum/1-300	Phycomyces_blakesleeanus/1-294	Pichia_kudriavzevii/1-294	Pneumocystis_jirovecii/1-292	Podila_verticillata/1-299	Pyricularia_oryzae/1-302	Rhizophagus_irregularis/1-297	Rhizopus_arrhizus/1-292	Rhizopus_stolonifer/1-126	Saccharomyces_cerevisiae/1-297	Saitoella_complicata/1-298	Schizosaccharomyces_pombe/1-294	Spizellomyces_punctatus/1-301	Sporothrix_schenckii/1-316	Trichoderma_harzianum/1-300	Yarrowia_lipolytica/1-296
Allomyces_macrogynus/1-294
Alternaria_alternata/1-300	0.61331
Aspergillus_fumigatus/1-300	0.58082	0.28518
Batrachochytrium_dendrobatidis/1-299	0.48752	0.6803	0.59417
Bipolaris_maydis/1-301	0.60842	0.08203	0.28351	0.66859
Botrytis_cinerea/1-295	0.62461	0.20725	0.23784	0.64728	0.21956
Candida_albicans/1-298	0.65814	0.4821	0.43603	0.70284	0.48709	0.49776
Coccidioides_immitis/1-300	0.62882	0.30196	0.19345	0.679	0.28612	0.25262	0.45811
Coemansia_reversa/1-293	0.38797	0.5963	0.54091	0.54619	0.58503	0.60615	0.59544	0.59984
Conidiobolus_coronatus/1-296	0.4204	0.56499	0.46575	0.4895	0.56378	0.53212	0.59704	0.53731	0.4085
Cucurbitaria_berberidis/1-300	0.58774	0.08243	0.3035	0.68309	0.10471	0.2168	0.48621	0.30922	0.57772	0.56423
Eremothecium_cymbalariae/1-297	0.61921	0.46521	0.38305	0.63156	0.45195	0.45357	0.26021	0.41955	0.5745	0.5852	0.47296
Fusarium_oxysporum/1-302	0.61717	0.25597	0.24227	0.71235	0.25034	0.21113	0.51373	0.26256	0.62704	0.58574	0.28483	0.45603
Histoplasma_capsulatum/1-299	0.63872	0.28361	0.17702	0.66601	0.26206	0.25294	0.44059	0.1444	0.58355	0.56205	0.29158	0.42197	0.22615
Linderina_pennispora/1-293	0.34876	0.57439	0.50124	0.52406	0.56173	0.56542	0.57766	0.57264	0.19493	0.31683	0.55572	0.55995	0.59498	0.54754
Neolecta_irregularis/1-295	0.55739	0.50012	0.45944	0.5591	0.48923	0.47442	0.47053	0.51167	0.49927	0.54047	0.4885	0.48557	0.50564	0.45589	0.48987
Neurospora_crassa/1-301	0.57068	0.27288	0.18577	0.653	0.2578	0.20044	0.46581	0.24746	0.57297	0.51388	0.27578	0.40717	0.18541	0.2295	0.54095	0.45095
Penicillium_chrysogenum/1-300	0.58137	0.36134	0.16668	0.59879	0.33623	0.33703	0.51829	0.28308	0.55739	0.47153	0.36283	0.4898	0.35744	0.2416	0.51362	0.52511	0.24616
Phycomyces_blakesleeanus/1-294	0.42014	0.58256	0.54933	0.52167	0.56696	0.61637	0.59417	0.5595	0.37646	0.44617	0.57985	0.54144	0.63578	0.58501	0.37208	0.51461	0.5569	0.57519
Pichia_kudriavzevii/1-294	0.61256	0.4256	0.39545	0.63073	0.42935	0.44566	0.28631	0.41315	0.53143	0.57942	0.45362	0.23339	0.45583	0.4118	0.55586	0.45365	0.42268	0.49063	0.57816
Pneumocystis_jirovecii/1-292	0.52691	0.53598	0.4714	0.57553	0.53444	0.53502	0.59885	0.51347	0.56351	0.49825	0.52997	0.53867	0.52885	0.46371	0.51927	0.37988	0.52792	0.52872	0.49878	0.51157
Podila_verticillata/1-299	0.37886	0.57308	0.49847	0.52638	0.55112	0.56725	0.61592	0.53848	0.41255	0.38821	0.54667	0.56204	0.60939	0.52426	0.36159	0.48002	0.51455	0.52369	0.35134	0.63342	0.43894
Pyricularia_oryzae/1-302	0.61049	0.2795	0.2218	0.66407	0.2689	0.19565	0.47573	0.20275	0.59012	0.55345	0.28997	0.44104	0.20211	0.20236	0.58171	0.48054	0.18227	0.32004	0.59175	0.43023	0.54204	0.56687
Rhizophagus_irregularis/1-297	0.42703	0.63218	0.56039	0.54155	0.60668	0.62435	0.64965	0.64015	0.38169	0.3954	0.62396	0.63412	0.66543	0.59927	0.35752	0.52259	0.58596	0.59492	0.44178	0.61342	0.51111	0.33337	0.61279
Rhizopus_arrhizus/1-292	0.44824	0.57648	0.57415	0.51193	0.58299	0.63319	0.62835	0.57547	0.39175	0.42706	0.6041	0.58172	0.66851	0.63576	0.36622	0.56737	0.59844	0.61488	0.17733	0.58342	0.52494	0.36577	0.62233	0.4357
Rhizopus_stolonifer/1-126	0.20114	0.36184	0.34894	0.23371	0.36511	0.46745	0.48421	0.37288	0.17629	0.27037	0.36738	0.38201	0.44593	0.38376	0.16614	0.27231	0.43608	0.36756	0.06814	0.39939	0.203	0.14385	0.47045	0.16482	0.03355
Saccharomyces_cerevisiae/1-297	0.5995	0.49531	0.41028	0.6275	0.47046	0.48493	0.25875	0.48272	0.55232	0.60277	0.4925	0.16221	0.46707	0.45064	0.54203	0.48076	0.41492	0.50353	0.54369	0.27978	0.5883	0.59637	0.46747	0.66496	0.59673	0.40781
Saitoella_complicata/1-298	0.59182	0.43421	0.4087	0.60532	0.44244	0.45165	0.4623	0.42689	0.5107	0.60583	0.4374	0.44105	0.45667	0.41361	0.47611	0.36125	0.42909	0.44607	0.51687	0.41733	0.43933	0.53921	0.43992	0.57653	0.55416	0.28757	0.45819
Schizosaccharomyces_pombe/1-294	0.63561	0.52902	0.4751	0.61889	0.54258	0.51199	0.52995	0.49118	0.56975	0.57903	0.53994	0.47335	0.54833	0.49126	0.51157	0.444	0.4894	0.52979	0.51642	0.46161	0.45441	0.57061	0.49114	0.59054	0.55701	0.39022	0.52071	0.46299
Spizellomyces_punctatus/1-301	0.39062	0.62307	0.52846	0.31538	0.61545	0.56015	0.62328	0.57834	0.46385	0.46534	0.60651	0.58883	0.62465	0.58174	0.43231	0.57571	0.57582	0.56067	0.46189	0.58043	0.56284	0.49633	0.59908	0.53509	0.47789	0.16421	0.62163	0.58215	0.6576
Sporothrix_schenckii/1-316	0.61618	0.33672	0.26766	0.65704	0.32508	0.2504	0.50496	0.30313	0.5608	0.55664	0.3385	0.49717	0.24169	0.27002	0.59414	0.50718	0.22555	0.31457	0.55759	0.50166	0.55042	0.55197	0.22914	0.60587	0.6101	0.44878	0.47398	0.50405	0.53435	0.61354
Trichoderma_harzianum/1-300	0.62382	0.23613	0.25558	0.66224	0.22127	0.20686	0.50027	0.26011	0.56641	0.50499	0.23298	0.46135	0.20034	0.27698	0.55923	0.48205	0.19908	0.31555	0.54478	0.43025	0.52865	0.54811	0.23773	0.60604	0.57835	0.39056	0.46529	0.43198	0.53843	0.56739	0.31611
Yarrowia_lipolytica/1-296	0.62474	0.44656	0.43733	0.7752	0.44249	0.46648	0.26541	0.46117	0.62879	0.60916	0.45554	0.28489	0.4531	0.42498	0.59613	0.53326	0.44903	0.50646	0.60353	0.2916	0.59927	0.62374	0.44895	0.68427	0.68167	0.4401	0.27627	0.49422	0.55172	0.66955	0.4963	0.48327

## Sheet: Cytc
	Allomyces_macrogynus/1-301	Alternaria_alternata/1-336	Aspergillus_fumigatus/1-319	Batrachochytrium_dendrobatidis/1-267	Bipolaris_maydis/1-336	Botrytis_cinerea/1-323	Candida_albicans/1-288	Coccidioides_immitis/1-319	Coemansia_reversa/1-319	Conidiobolus_coronatus/1-289	Cucurbitaria_berberidis/1-337	Eremothecium_cymbalariae/1-297	Fusarium_oxysporum/1-322	Histoplasma_capsulatum/1-326	Linderina_pennispora/1-277	Neolecta_irregularis/1-310	Neurospora_crassa/1-321	Penicillium_chrysogenum/1-327	Phycomyces_blakesleeanus/1-239	Pichia_kudriavzevii/1-302	Pneumocystis_jirovecii/1-295	Podila_verticillata/1-308	Pyricularia_oryzae/1-324	Rhizophagus_irregularis/1-310	Rhizopus_arrhizus/1-303	Rhizopus_stolonifer/1-287	Saccharomyces_cerevisiae/1-309	Saitoella_complicata/1-307	Schizosaccharomyces_pombe/1-307	Spizellomyces_punctatus/1-350	Sporothrix_schenckii/1-314	Trichoderma_harzianum/1-318	Yarrowia_lipolytica/1-280
Allomyces_macrogynus/1-301
Alternaria_alternata/1-336	0.74485
Aspergillus_fumigatus/1-319	0.68665	0.34871
Batrachochytrium_dendrobatidis/1-267	0.58337	0.82631	0.81392
Bipolaris_maydis/1-336	0.72515	0.07163	0.3646	0.82026
Botrytis_cinerea/1-323	0.67833	0.31969	0.35071	0.75297	0.33394
Candida_albicans/1-288	0.61748	0.64799	0.57655	0.6995	0.62934	0.57302
Coccidioides_immitis/1-319	0.74308	0.35281	0.18531	0.78703	0.37308	0.35899	0.60913
Coemansia_reversa/1-319	0.61438	0.82008	0.75488	0.68796	0.83334	0.74342	0.71072	0.76473
Conidiobolus_coronatus/1-289	0.47793	0.68342	0.62591	0.61523	0.68892	0.63672	0.57443	0.63526	0.5957
Cucurbitaria_berberidis/1-337	0.742	0.08782	0.36519	0.84884	0.10639	0.34603	0.6556	0.37011	0.82607	0.67951
Eremothecium_cymbalariae/1-297	0.61564	0.69812	0.65357	0.7125	0.70389	0.62022	0.24684	0.66045	0.66374	0.58016	0.7077
Fusarium_oxysporum/1-322	0.74308	0.38179	0.40625	0.80577	0.38646	0.35386	0.62619	0.42662	0.78391	0.64339	0.39868	0.6631
Histoplasma_capsulatum/1-326	0.72342	0.36256	0.23561	0.76136	0.39655	0.36431	0.6069	0.15913	0.72683	0.65242	0.37116	0.65259	0.41313
Linderina_pennispora/1-277	0.49283	0.73616	0.63743	0.63676	0.74788	0.64062	0.60445	0.65715	0.16535	0.57253	0.73022	0.61684	0.69923	0.6414
Neolecta_irregularis/1-310	0.7183	0.70214	0.59903	0.85548	0.72247	0.5985	0.63669	0.63382	0.79271	0.5595	0.6917	0.69133	0.62613	0.63498	0.65547
Neurospora_crassa/1-321	0.68518	0.28171	0.35735	0.7945	0.29745	0.27216	0.61739	0.3407	0.79139	0.62222	0.30391	0.65884	0.24617	0.3403	0.69077	0.61129
Penicillium_chrysogenum/1-327	0.71556	0.35594	0.1757	0.79671	0.3845	0.36684	0.62469	0.2603	0.75616	0.64706	0.37549	0.67292	0.42316	0.29967	0.61463	0.63058	0.34523
Phycomyces_blakesleeanus/1-239	0.35455	0.57138	0.45898	0.58194	0.56799	0.49967	0.42582	0.49252	0.47243	0.31397	0.58816	0.41378	0.5575	0.46955	0.4551	0.48911	0.54758	0.48792
Pichia_kudriavzevii/1-302	0.62146	0.65532	0.58122	0.7304	0.64945	0.60538	0.25072	0.59505	0.71062	0.60677	0.64969	0.3033	0.62392	0.5881	0.642	0.68101	0.62249	0.60023	0.44268
Pneumocystis_jirovecii/1-295	0.61237	0.63537	0.58245	0.75177	0.65387	0.63172	0.54386	0.61046	0.63923	0.56479	0.65334	0.61911	0.62951	0.59748	0.55439	0.58829	0.63829	0.60583	0.39164	0.59541
Podila_verticillata/1-308	0.51799	0.65013	0.57339	0.67615	0.64508	0.59296	0.59573	0.58289	0.57061	0.41938	0.653	0.61676	0.69139	0.59243	0.52942	0.68171	0.64097	0.59987	0.28126	0.57236	0.60725
Pyricularia_oryzae/1-324	0.67003	0.34376	0.3901	0.79604	0.36504	0.33095	0.60618	0.38698	0.74859	0.61735	0.36333	0.64314	0.27871	0.35927	0.63985	0.60135	0.18753	0.39427	0.55021	0.63395	0.65957	0.6909
Rhizophagus_irregularis/1-310	0.55208	0.69801	0.6352	0.63476	0.71477	0.65648	0.57643	0.65829	0.4886	0.53995	0.72955	0.56786	0.72212	0.6392	0.48889	0.64977	0.68684	0.68248	0.31823	0.59875	0.5814	0.49464	0.6656
Rhizopus_arrhizus/1-303	0.51448	0.67817	0.60905	0.6381	0.68994	0.64243	0.59559	0.58575	0.5283	0.45047	0.69574	0.5323	0.67704	0.60728	0.46261	0.63197	0.63565	0.64225	0.15145	0.58516	0.56412	0.44535	0.6848	0.48379
Rhizopus_stolonifer/1-287	0.47105	0.6298	0.54565	0.61368	0.63501	0.57889	0.46824	0.56322	0.50051	0.34185	0.64141	0.45363	0.60981	0.54305	0.48395	0.5768	0.59674	0.57331	0.1351	0.4949	0.48017	0.36233	0.61362	0.40576	0.09184
Saccharomyces_cerevisiae/1-309	0.6067	0.70122	0.58755	0.70004	0.71108	0.64102	0.28255	0.59523	0.6756	0.57936	0.69842	0.1894	0.66271	0.61131	0.61627	0.68295	0.63884	0.60546	0.42621	0.2912	0.53687	0.56704	0.62739	0.5677	0.57697	0.48567
Saitoella_complicata/1-307	0.60361	0.57807	0.56066	0.69284	0.61381	0.53467	0.50332	0.59319	0.62796	0.48837	0.60957	0.51377	0.55427	0.63219	0.58461	0.61931	0.60532	0.61781	0.32885	0.52278	0.52313	0.51076	0.61485	0.53632	0.47303	0.41337	0.53486
Schizosaccharomyces_pombe/1-307	0.77098	0.7424	0.72481	0.83426	0.72036	0.71787	0.7047	0.77359	0.83588	0.71743	0.7361	0.8297	0.76918	0.7573	0.70021	0.71822	0.74082	0.76199	0.55543	0.77277	0.62177	0.81334	0.70425	0.79511	0.74703	0.67965	0.85383	0.65649
Spizellomyces_punctatus/1-350	0.56113	0.86853	0.85453	0.30285	0.8492	0.83677	0.72238	0.85261	0.73997	0.57609	0.9137	0.73646	0.83879	0.81141	0.62399	0.85866	0.81476	0.88634	0.453	0.73342	0.71617	0.65176	0.84514	0.65729	0.55851	0.54698	0.78036	0.70995	0.88645
Sporothrix_schenckii/1-314	0.69779	0.36922	0.37417	0.80768	0.38709	0.34933	0.58659	0.38573	0.78069	0.63208	0.41403	0.64648	0.29861	0.37516	0.6305	0.64472	0.22198	0.36729	0.51479	0.59125	0.62221	0.67526	0.20413	0.63806	0.62855	0.59184	0.65505	0.5892	0.75262	0.81785
Trichoderma_harzianum/1-318	0.6975	0.37508	0.43198	0.79858	0.3794	0.36369	0.64099	0.43968	0.75792	0.68069	0.38489	0.67011	0.1657	0.43306	0.70919	0.68749	0.25332	0.40584	0.55678	0.63643	0.66841	0.64659	0.27904	0.68059	0.65204	0.62211	0.67576	0.54235	0.7585	0.86676	0.29998
Yarrowia_lipolytica/1-280	0.56639	0.60287	0.52585	0.66951	0.59348	0.5689	0.37025	0.56347	0.63192	0.53382	0.61562	0.37143	0.59513	0.57299	0.56562	0.56439	0.56125	0.51466	0.39826	0.38788	0.48266	0.54856	0.60442	0.57179	0.49301	0.44986	0.38084	0.48458	0.63122	0.68661	0.54305	0.57636

## Sheet: Actin
	Allomyces_macrogynus/1-375	Alternaria_alternata/1-375	Aspergillus_fumigatus/1-388	Batrachochytrium_dendrobatidis/1-332	Bipolaris_maydis/1-375	Botrytis_cinerea/1-375	Candida_albicans/1-376	Coccidioides_immitis/1-375	Coemansia_reversa/1-375	Conidiobolus_coronatus/1-360	Cucurbitaria_berberidis/1-375	Eremothecium_cymbalariae/1-376	Fusarium_oxysporum/1-375	Histoplasma_capsulatum/1-375	Linderina_pennispora/1-368	Neolecta_irregularis/1-374	Neurospora_crassa/1-375	Penicillium_chrysogenum/1-375	Phycomyces_blakesleeanus/1-375	Pichia_kudriavzevii/1-377	Pneumocystis_jirovecii/1-383	Podila_verticillata/1-375	Pyricularia_oryzae/1-375	Rhizophagus_irregularis/1-375	Rhizopus_arrhizus/1-375	Rhizopus_stolonifer/1-375	Saccharomyces_cerevisae/1-375	Saitoella_complicata/1-398	Schizosaccharomyces_pombe/1-375	Spizellomyces_punctatus/1-375	Sporothrix_schenckii/1-422	Trichoderma_harzianum/1-375	Yarrowia_lipolytica/1-375
Allomyces_macrogynus/1-375
Alternaria_alternata/1-375	0.14258
Aspergillus_fumigatus/1-388	0.14599	0.00527
Batrachochytrium_dendrobatidis/1-332	0.09447	0.09266	0.09266
Bipolaris_maydis/1-375	0.14258	0	0.00527	0.09266
Botrytis_cinerea/1-375	0.14554	0.00523	0.01056	0.0961	0.00523
Candida_albicans/1-376	0.16786	0.11361	0.11737	0.12376	0.11361	0.11091
Coccidioides_immitis/1-375	0.14533	0.02368	0.0292	0.09892	0.02368	0.02901	0.11902
Coemansia_reversa/1-375	0.1263	0.1292	0.13603	0.09457	0.1292	0.12647	0.13885	0.1379
Conidiobolus_coronatus/1-360	0.14102	0.14611	0.14611	0.10097	0.14611	0.14959	0.16804	0.14898	0.12783
Cucurbitaria_berberidis/1-375	0.14258	0	0.00527	0.09266	0	0.00523	0.11361	0.02368	0.1292	0.14611
Eremothecium_cymbalariae/1-376	0.15813	0.09831	0.1019	0.10904	0.09831	0.09564	0.06197	0.09575	0.14221	0.14491	0.09831
Fusarium_oxysporum/1-375	0.14273	0.00787	0.01324	0.09303	0.00787	0.00787	0.11989	0.03174	0.1329	0.14931	0.00787	0.09866
Histoplasma_capsulatum/1-375	0.14224	0.01838	0.02384	0.09898	0.01838	0.02369	0.11337	0.01047	0.12979	0.14906	0.01838	0.0958	0.02639
Linderina_pennispora/1-368	0.11263	0.10436	0.10436	0.06511	0.10436	0.10753	0.12304	0.11304	0.03562	0.11794	0.10436	0.12875	0.11069	0.10716
Neolecta_irregularis/1-374	0.6479	0.6014	0.61537	0.6092	0.6014	0.60679	0.61919	0.61031	0.61194	0.61857	0.6014	0.61911	0.60154	0.60652	0.61197
Neurospora_crassa/1-375	0.14273	0.00787	0.01324	0.09303	0.00787	0.00787	0.11989	0.03174	0.1329	0.14931	0.00787	0.09866	0	0.02639	0.11069	0.60154
Penicillium_chrysogenum/1-375	0.15155	0.00785	0.0132	0.10224	0.00785	0.00785	0.11403	0.03165	0.12617	0.15353	0.00785	0.10106	0.01579	0.02632	0.10727	0.60989	0.01579
Phycomyces_blakesleeanus/1-375	0.09775	0.08711	0.09339	0.0608	0.08711	0.09013	0.12848	0.08976	0.09651	0.10475	0.08711	0.11313	0.08742	0.0898	0.08946	0.61213	0.08742	0.09554
Pichia_kudriavzevii/1-377	0.15519	0.09236	0.09588	0.1061	0.09236	0.0897	0.06174	0.09547	0.14149	0.15215	0.09236	0.02632	0.09839	0.09552	0.12262	0.61298	0.09839	0.09509	0.11034
Pneumocystis_jirovecii/1-383	0.12176	0.09274	0.09907	0.07714	0.09274	0.09599	0.13152	0.10373	0.12843	0.11974	0.09274	0.13569	0.09902	0.10378	0.10117	0.63269	0.09902	0.09915	0.08939	0.12488
Podila_verticillata/1-375	0.09485	0.08506	0.09136	0.05182	0.08506	0.08809	0.12378	0.08215	0.10333	0.1083	0.08506	0.09642	0.08536	0.08779	0.08148	0.61714	0.08536	0.09354	0.06272	0.09935	0.07578
Pyricularia_oryzae/1-375	0.14235	0.01316	0.01859	0.09956	0.01316	0.00788	0.11992	0.03713	0.1297	0.15213	0.01316	0.09869	0.00525	0.03176	0.11671	0.60766	0.00525	0.01579	0.09013	0.09842	0.10226	0.09113
Rhizophagus_irregularis/1-375	0.09553	0.09108	0.09747	0.03344	0.09108	0.09414	0.11835	0.09378	0.08412	0.1057	0.09108	0.09963	0.09141	0.08817	0.06765	0.59973	0.09141	0.09962	0.05151	0.10257	0.07933	0.03508	0.09722
Rhizopus_arrhizus/1-375	0.0916	0.07853	0.0847	0.04214	0.07853	0.0815	0.12204	0.08119	0.08541	0.09844	0.07853	0.10089	0.07881	0.08123	0.07245	0.60318	0.07881	0.08689	0.01847	0.10374	0.07838	0.04847	0.08151	0.03493
Rhizopus_stolonifer/1-375	0.09171	0.08421	0.09044	0.0422	0.08421	0.08721	0.11634	0.08687	0.08307	0.09858	0.08421	0.10102	0.08451	0.08691	0.07002	0.60182	0.08451	0.09021	0.02382	0.10388	0.07847	0.04853	0.08721	0.03498	0.00526
Saccharomyces_cerevisae/1-375	0.15222	0.08159	0.08502	0.09613	0.08159	0.07892	0.05403	0.0814	0.13639	0.14167	0.08159	0.01842	0.08188	0.08144	0.11681	0.61599	0.08188	0.08431	0.10189	0.0318	0.12443	0.09096	0.0819	0.09415	0.0898	0.08992
Saitoella_complicata/1-398	0.12872	0.077	0.08325	0.07794	0.077	0.08001	0.13932	0.09386	0.12785	0.13456	0.077	0.11454	0.07728	0.0939	0.10576	0.62599	0.07728	0.08548	0.08833	0.11136	0.09587	0.06047	0.08304	0.06343	0.07418	0.07427	0.10315
Schizosaccharomyces_pombe/1-375	0.10735	0.08253	0.08882	0.06795	0.08253	0.08525	0.14469	0.09094	0.12435	0.12536	0.08253	0.12305	0.08253	0.09098	0.09654	0.60991	0.08253	0.08861	0.08493	0.10831	0.0719	0.06881	0.08828	0.0662	0.07366	0.07376	0.10822	0.0606
Spizellomyces_punctatus/1-375	0.09443	0.09897	0.10177	0.01499	0.09897	0.10205	0.12345	0.10166	0.08643	0.0992	0.09897	0.1019	0.09933	0.10171	0.05861	0.61765	0.09933	0.10751	0.05391	0.09921	0.08186	0.04593	0.10514	0.02965	0.04285	0.0429	0.09645	0.07455	0.07732
Sporothrix_schenckii/1-422	0.14698	0.02109	0.0266	0.09996	0.02109	0.02109	0.12595	0.03975	0.13466	0.14863	0.02109	0.10482	0.01315	0.03438	0.11168	0.62531	0.01315	0.02376	0.09105	0.11338	0.10308	0.089	0.01845	0.09267	0.08234	0.0881	0.0873	0.08416	0.08617	0.10068
Trichoderma_harzianum/1-375	0.14579	0.01051	0.01591	0.09628	0.01051	0.01051	0.12284	0.03443	0.12994	0.15252	0.01051	0.10154	0.00262	0.02907	0.10774	0.6018	0.00262	0.01844	0.09028	0.10126	0.10191	0.08823	0.00788	0.0943	0.08164	0.08735	0.08472	0.08015	0.0854	0.10222	0.01579
Yarrowia_lipolytica/1-375	0.17282	0.10273	0.10925	0.13054	0.10273	0.09967	0.12895	0.11111	0.15004	0.16419	0.10273	0.11985	0.10857	0.11117	0.13354	0.63812	0.10857	0.10551	0.11124	0.11047	0.12965	0.11598	0.1086	0.11634	0.10845	0.11437	0.10848	0.1261	0.12275	0.12125	0.11245	0.11151
