# Supplementary material for: Emergence of Dip2-mediated specific DAG-based PKC signalling axis in eukaryotes
Source: eLife journal article supplement (doi:10.7554/elife.104011), 2025-01-09
Supplement: fig5-figsupp2-data1 [file Figure 5. figure supplement 2D.xlsx]

## Sheet: Sheet2
r1	r2	n1	n2		R1		R2		z score
1.2396	1.2396	33	33		0.845342		0.845342	PKC						R=Pearson correl coeff
1.2396	0.644446	33	32		0.845342		0.567919	ERG4	2.28541	0.018413	*			r=Fischer Transformation coeff
1.2396	0.757843	33	33		0.845342		0.639805	FAA1	1.86584	0.053773	ns
1.2396	0.255994	33	33		0.845342		0.250545	LCB1	3.8095	0.000106	***
1.2396	0.947926	33	33		0.845342		0.738843	PGK1	1.12966	0.236465	ns
1.2396	0.0843784	33	33		0.845342		0.0841787	ACT	4.47416	5e-06	****
1.2396	1.00777	33	33		0.845342		0.76484	HSP60	0.897867	0.314062	ns
1.2396	0.587994	33	33		0.845342		0.528452	CYTC	2.52366	0.009896	**
1.2396	0.197993	33	33		0.845342		0.195446	TPI1	4.03413	4.5e-05	****
1.2396	0.788035	33	33		0.845342		0.657295	GAPDH	1.74891	0.072733	ns
1.2396	0.128374	33	33		0.845342		0.127673	CDC42	4.30377	1.3e-05	****
1.2396	0.341815	33	33		0.845342		0.329097	RHO1	3.47711	0.000404	***
1.2396	0.554233	33	33		0.845342		0.503686	STE20	2.65442	0.006189	**
1.2396	0.654861	33	33		0.845342		0.574933	RPL5	2.26469	0.018413	*
1.2396	0.411125	33	33		0.845342		0.389427	TGL3	3.20868	0.001075	**
