# Supplementary figures and images for: Emergence of Dip2-mediated specific DAG-based PKC signalling axis in eukaryotes
Source: eLife journal article supplement (doi:10.7554/elife.104011), 2025-01-09

Figure 1-source data 1

## Control

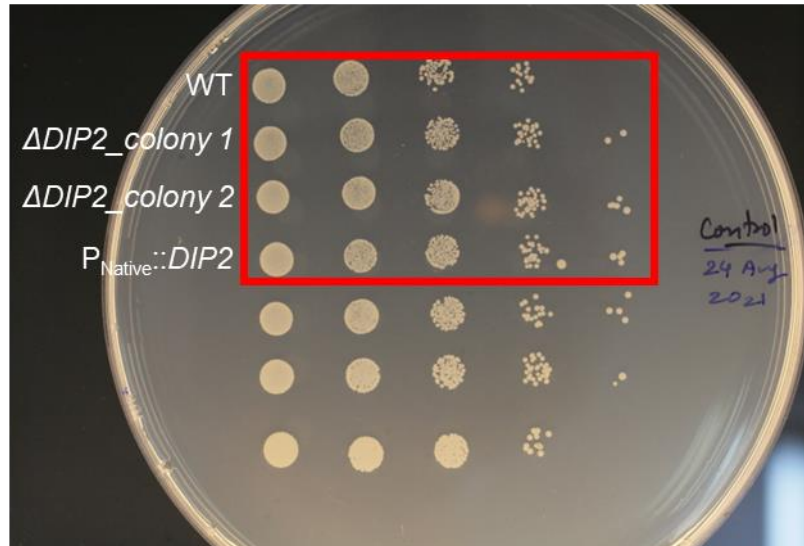

## CW stress (CR)

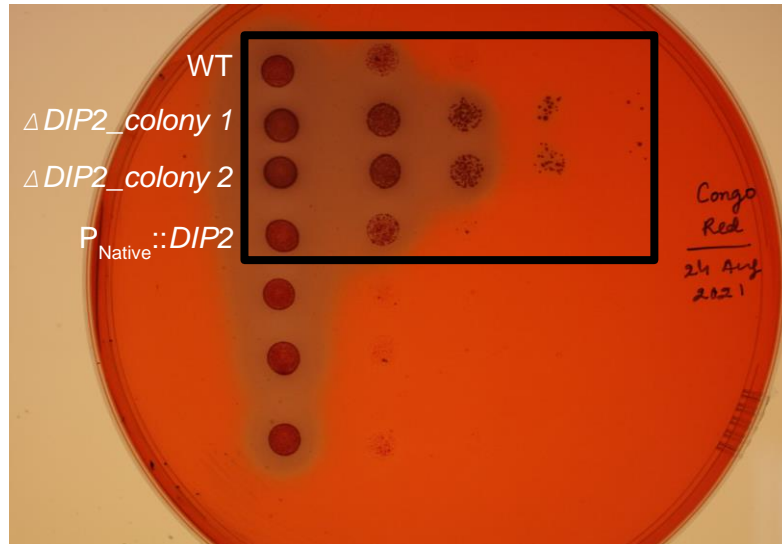

## CW stress (CR)

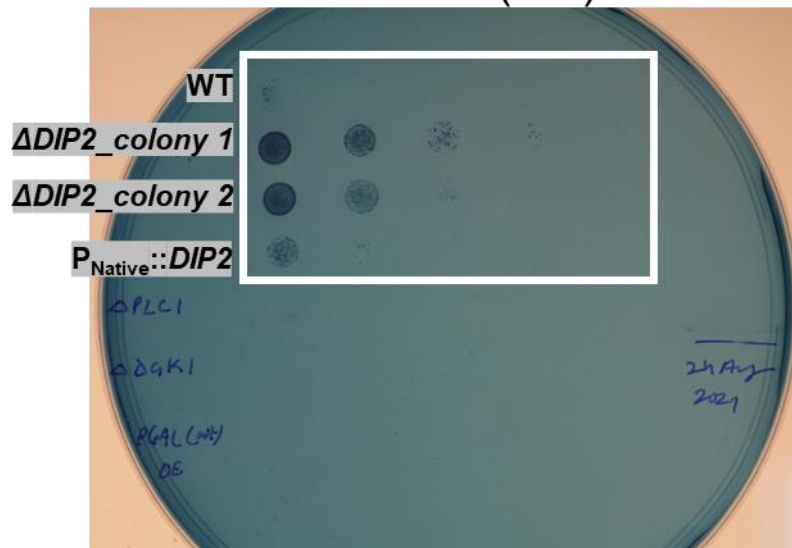

Supplement: fig1-data1 [file elife-104011-fig1-data1-v1.zip]

Figure 1-source data 10

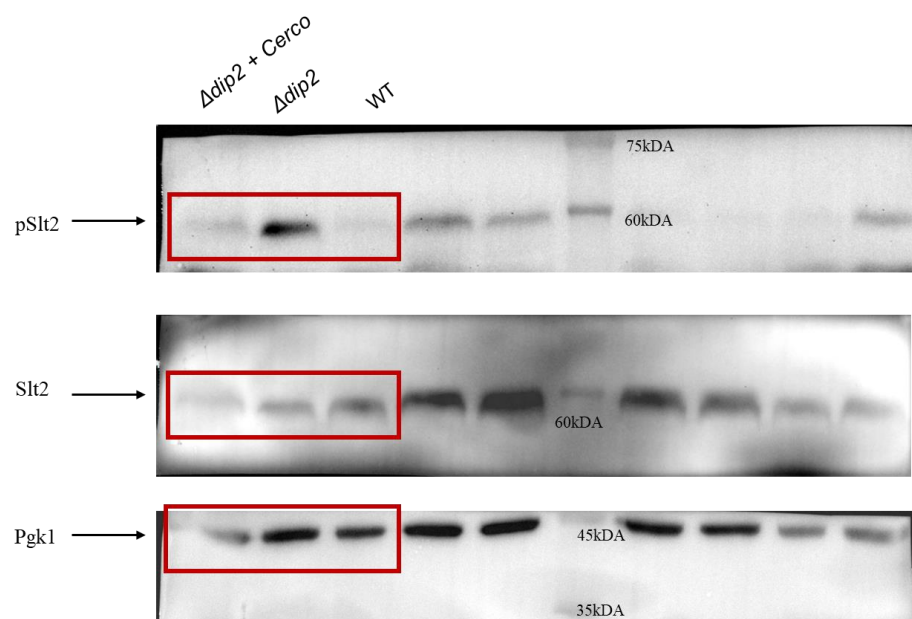

Supplement: fig1-data10 [file elife-104011-fig1-data10-v1.zip]

Figure 1-source data 4

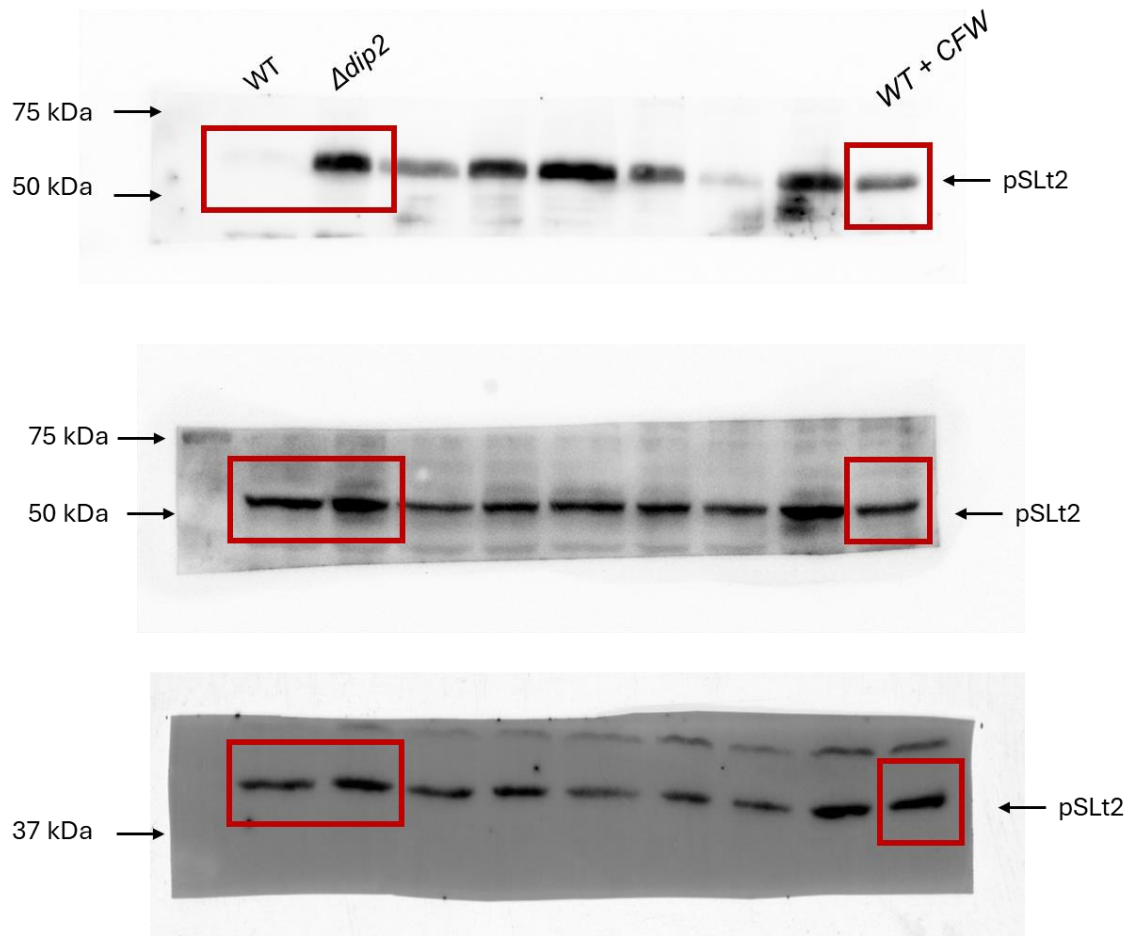

Supplement: fig1-data4 [file elife-104011-fig1-data4-v1.zip]

Figure 1-source data 6

Control

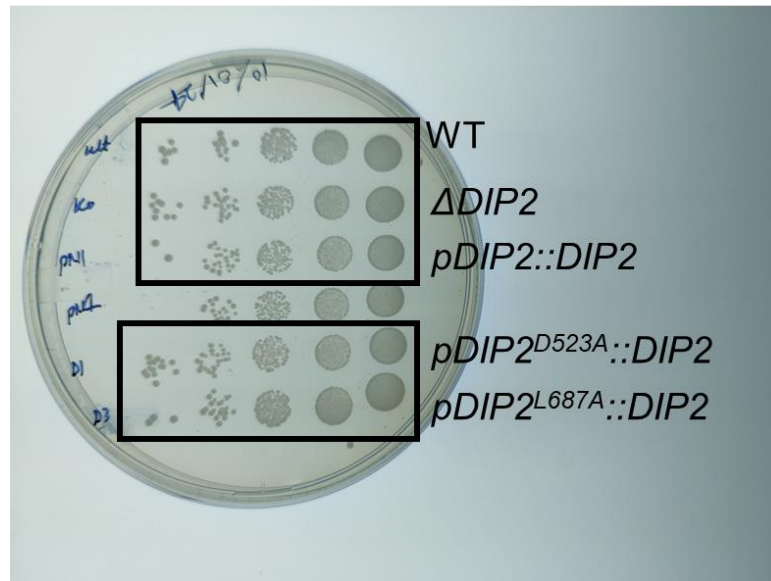

CW stress (CR)

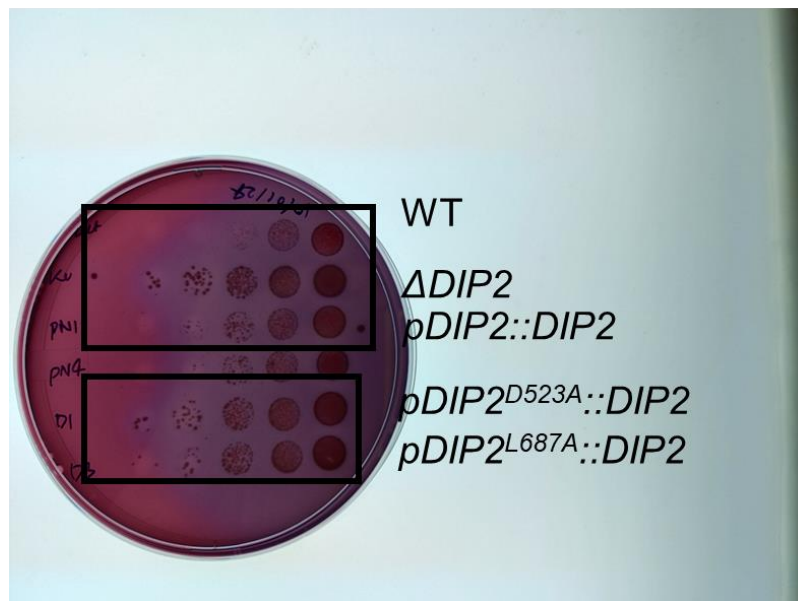

Supplement: fig1-data6 [file elife-104011-fig1-data6-v1.zip]

Figure 1-source data 8

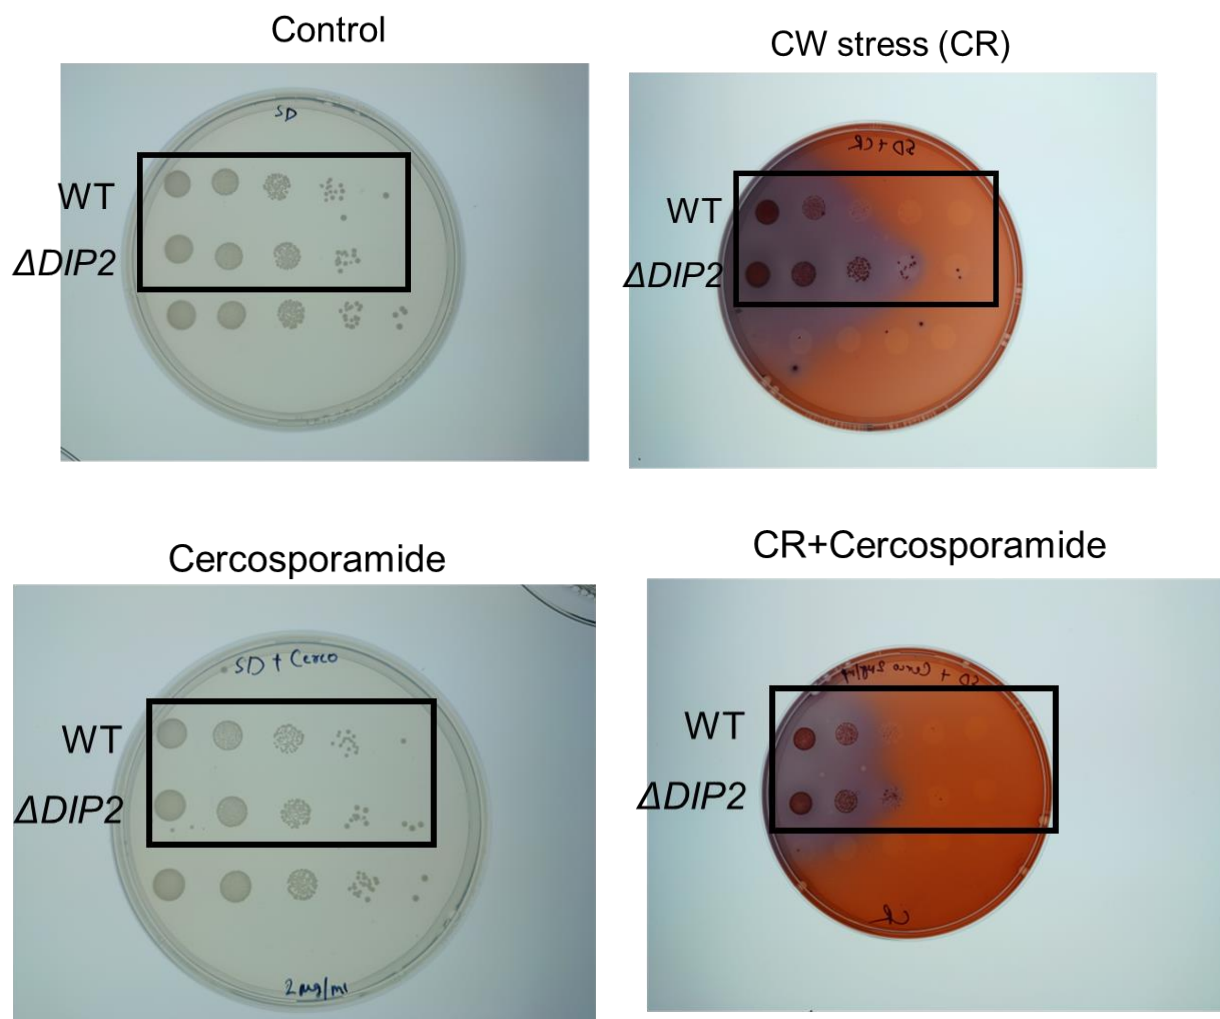

Supplement: fig1-data8 [file elife-104011-fig1-data8-v1.zip]

Figure 1. figure supplement 1

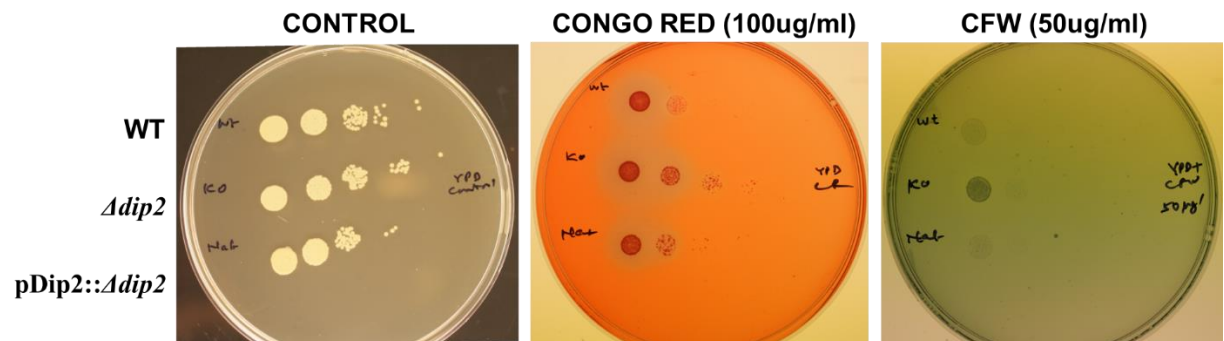

Supplement: fig1-figsupp1-data1 [file elife-104011-fig1-figsupp1-data1-v1.zip]

**Figure 1. figure supplement 2**

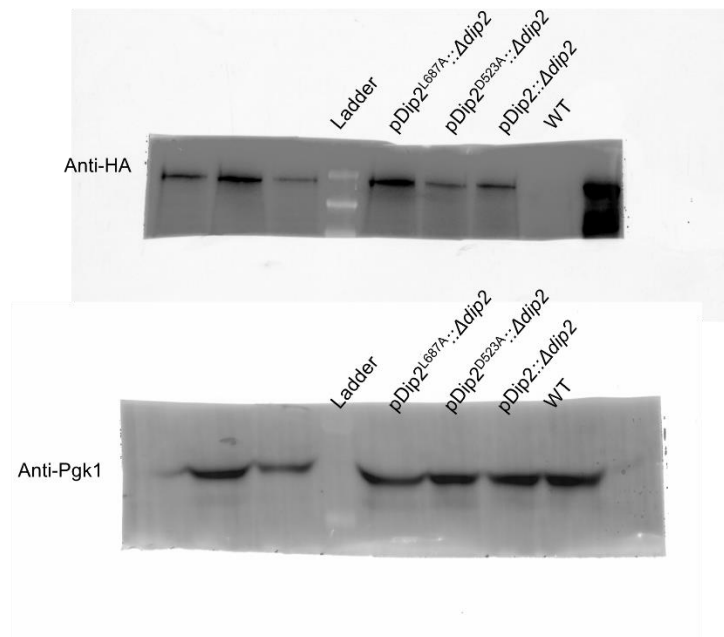

Supplement: fig1-figsupp2-data1 [file elife-104011-fig1-figsupp2-data1-v1.zip]

Fig 1 Fig Supplement 2B

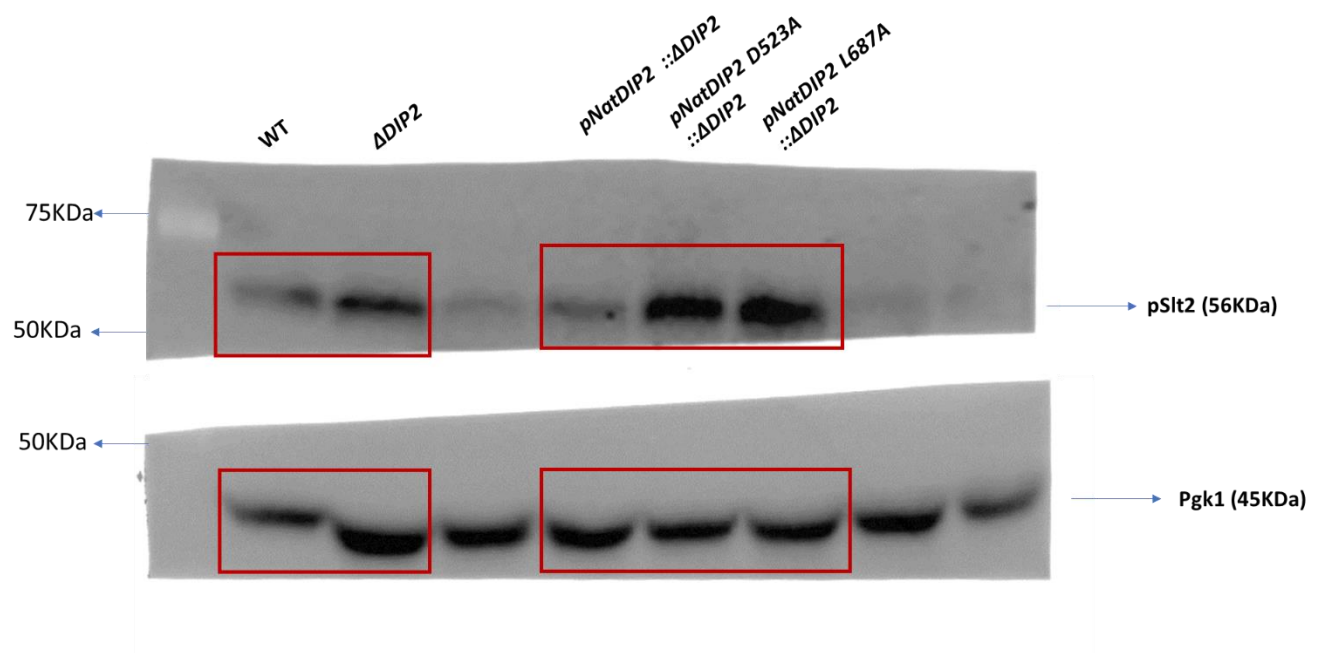

Whole blot was cut into 2 parts and probed for pSlt2 (M.W 56KDa) and Pgk1 (M.W. 45KDa)

Supplement: fig1-figsupp2-data3 [file elife-104011-fig1-figsupp2-data3-v1.zip]

Figure 2-source data 2

Figure 2C

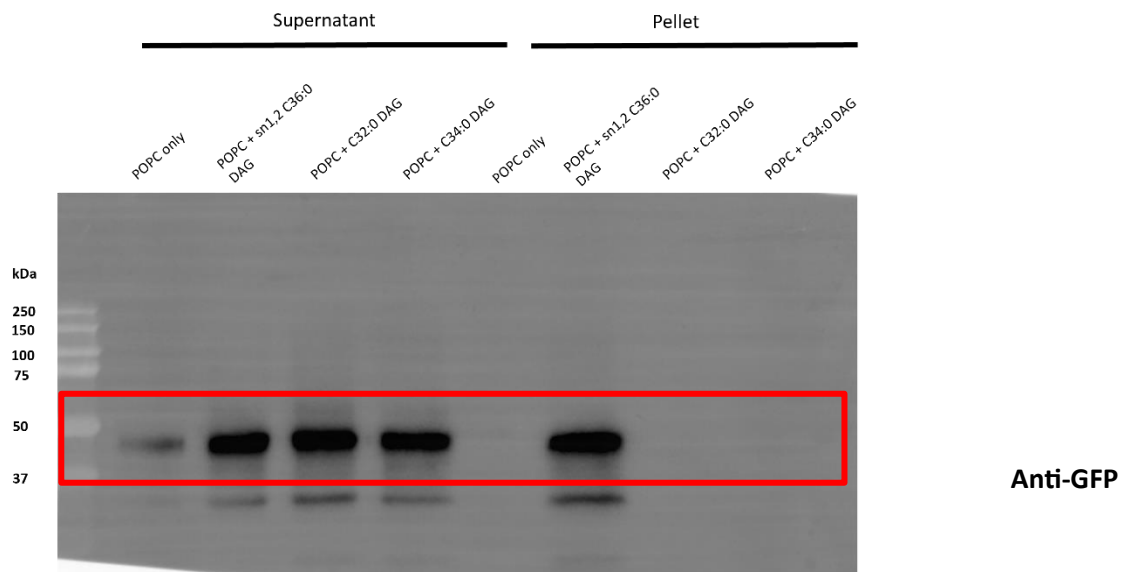

Figure 2D

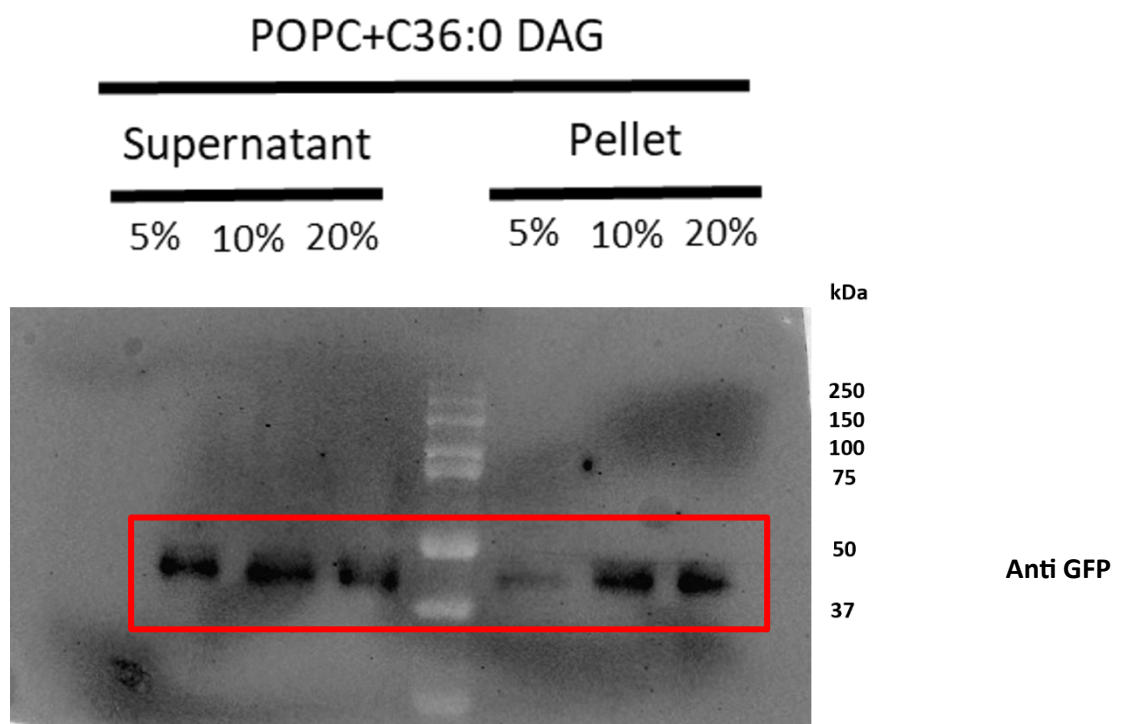

**Figure 2E**

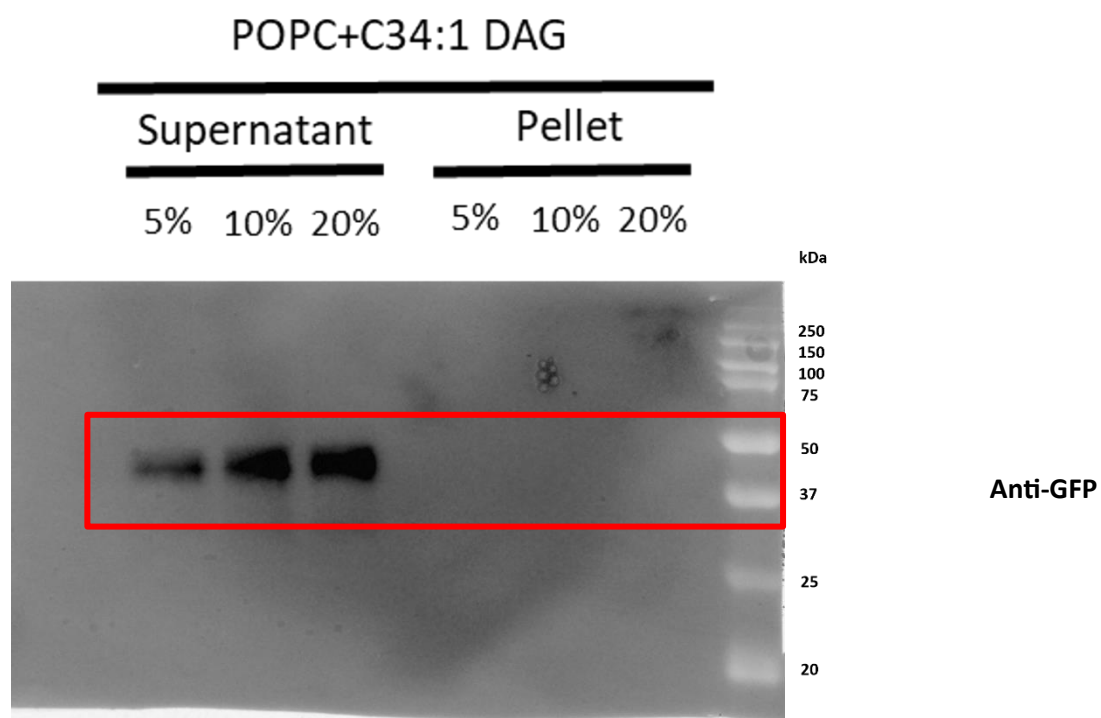

Supplement: fig2-data2 [file elife-104011-fig2-data2-v1.zip]

**Figure 2. figure supplement 1 A**

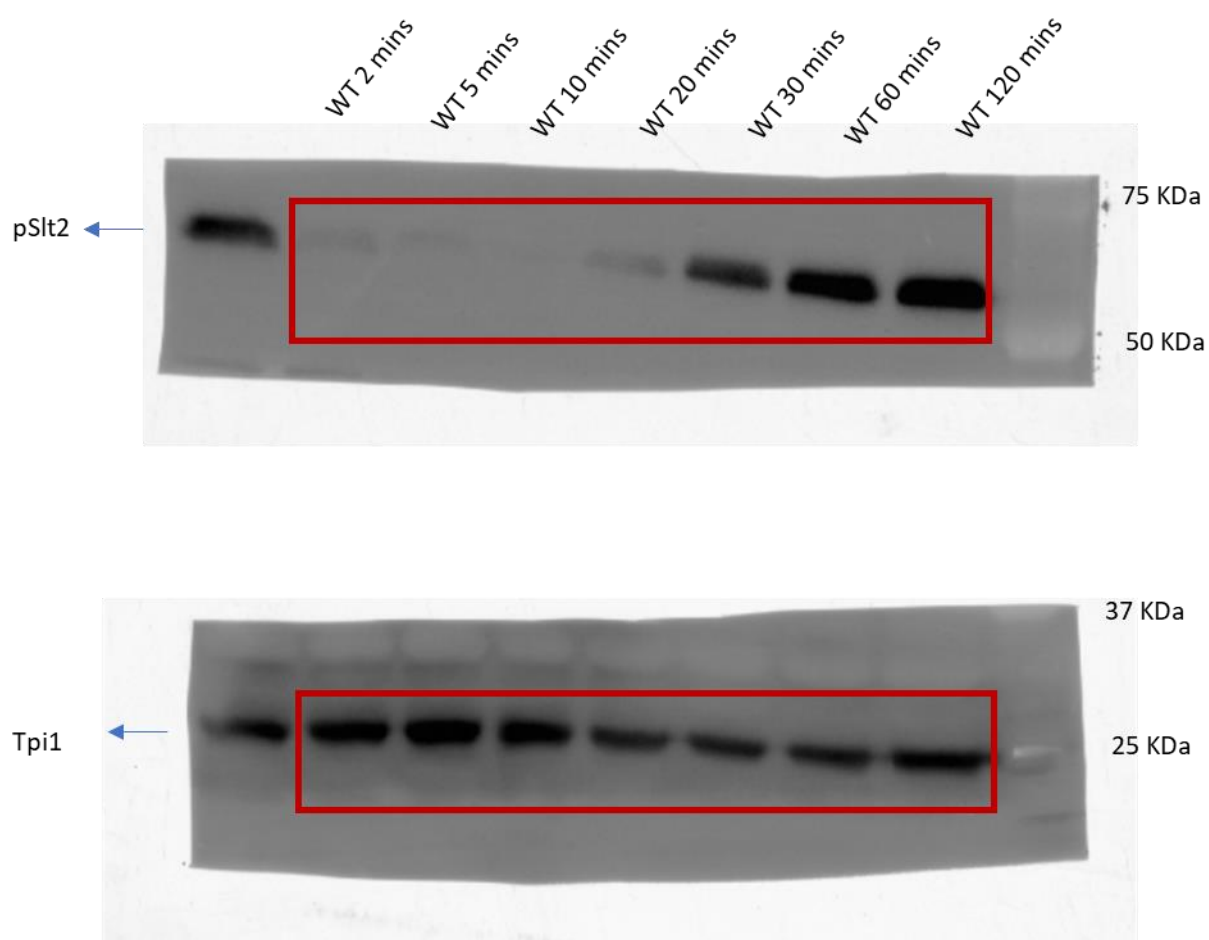

Supplement: fig2-figsupp1-data1 [file elife-104011-fig2-figsupp1-data1-v1.zip]

**Figure 2. figure supplement 3A**

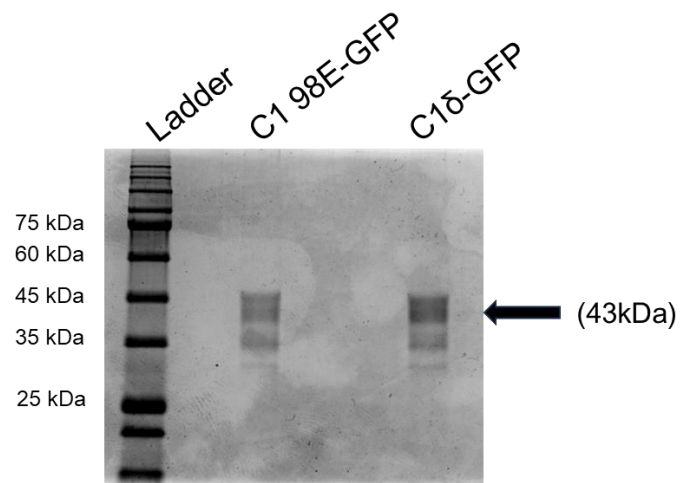

**Figure 2. figure supplement 3B**

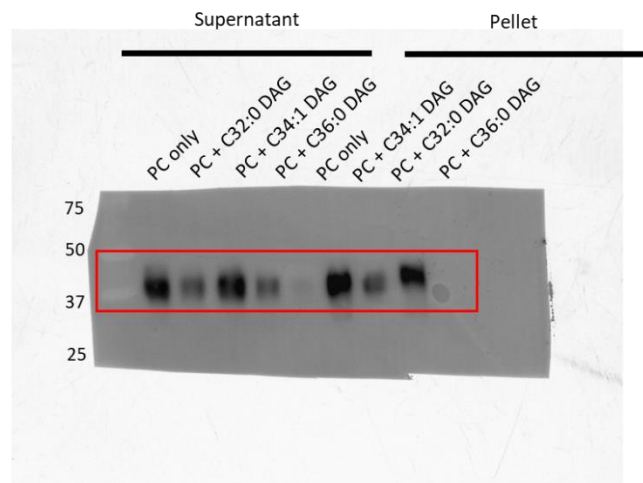

Figure 2. figure supplement 3C

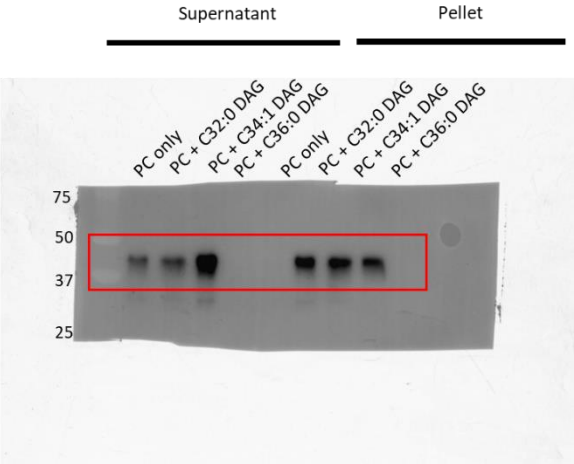

Supplement: fig2-figsupp3-data1 [file elife-104011-fig2-figsupp3-data1-v1.zip]

Figure 3- source data 6

Spot assay for *LRO1 DGA1* DKO

Control

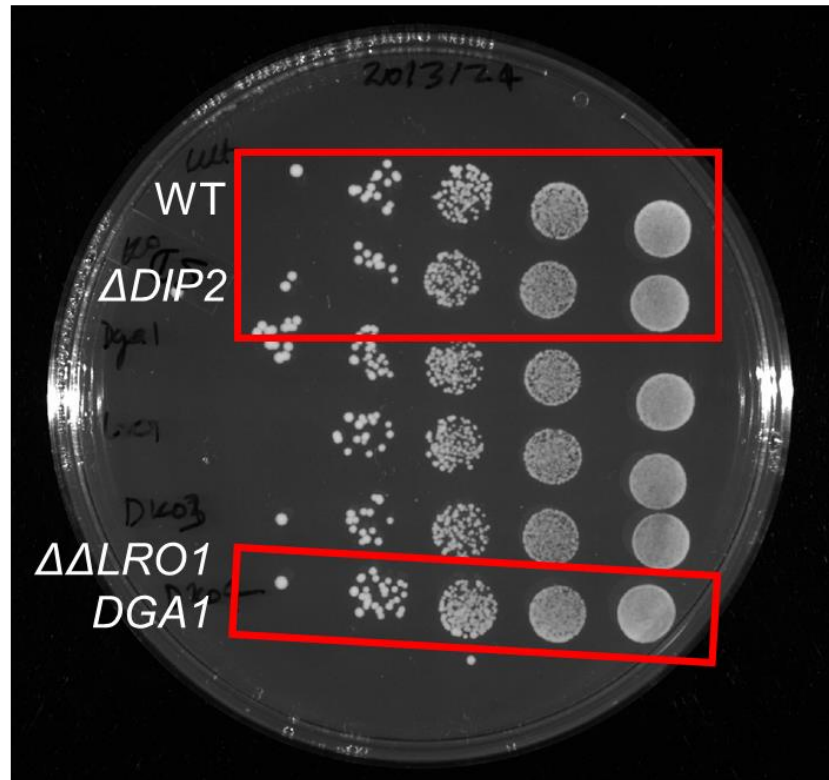

CW stress (CFW)

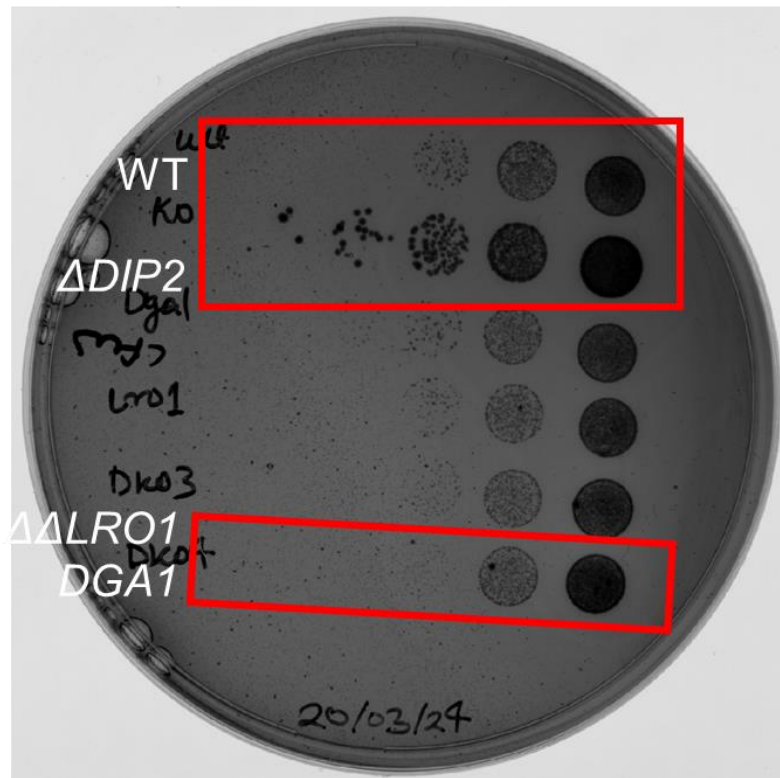

Supplement: fig3-data6 [file elife-104011-fig3-data6-v1.zip]

Figure 3. figure supplement 1A

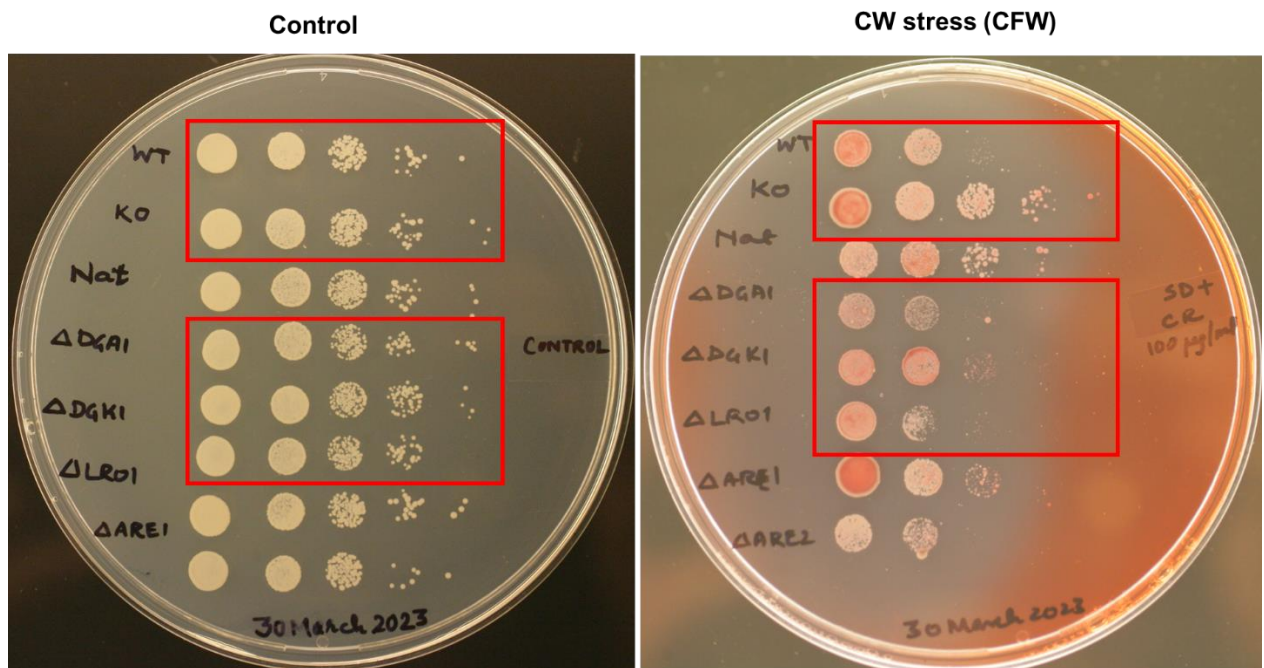

Supplement: fig3-figsupp1-data1 [file elife-104011-fig3-figsupp1-data1-v1.zip]

Figure 3. figure supplement 1B

Control

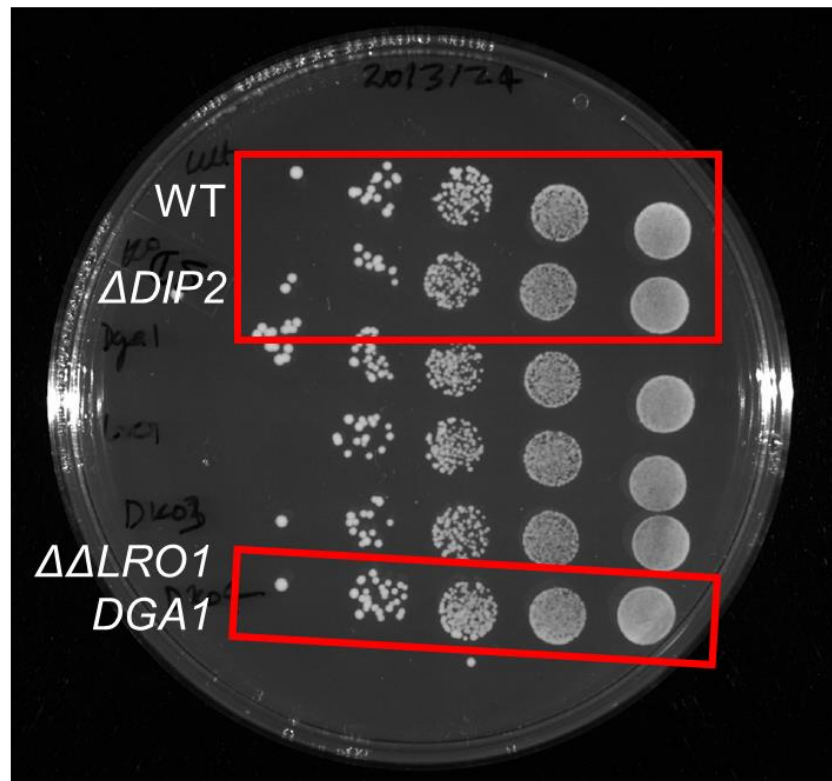

CW stress (CFW)

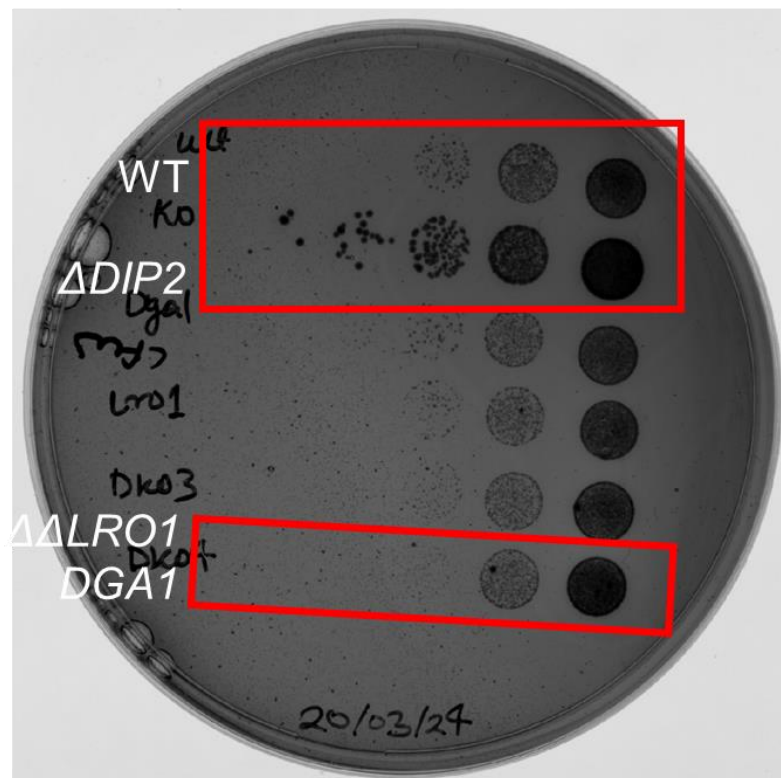

# CW stress (CR)

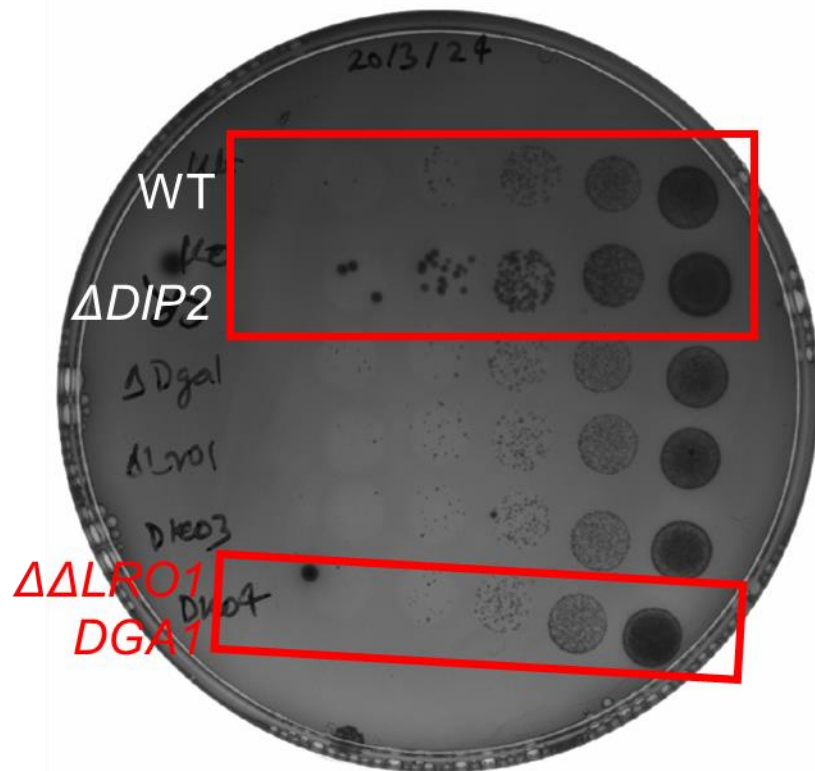

Supplement: fig3-figsupp1-data3 [file elife-104011-fig3-figsupp1-data3-v1.zip]
